# Supplementary material for: Conformational design concepts for anions in ionic liquids
Source: Royal Society of Chemistry journal article supplement (doi:10.1039/d0sc01379j), 2020-01-01

FPB282 YT tube capillary

**Av-400C**

Current Data Parameters  
NAME Nov15-2019  
EXPNO 10  
PROCNO 1

F2 - Acquisition Parameters  
Date\_ 20191115  
Time 12.05  
INSTRUM spect  
PROBHD 5 mm PABBO BB/  
PULPROG zg30  
TD 32768  
SOLVENT DMSO\_weak  
NS 16  
DS 2  
SWH 8012.820 Hz  
FIDRES 0.244532 Hz  
AQ 2.0447233 sec  
RG 3.54  
DW 62.400 usec  
DE 6.50 usec  
TE 294.1 K  
D1 1.00000000 sec  
TD0 1

==== CHANNEL f1 =====  
SFO1 400.2024012 MHz  
NUC1 1H  
P1 11.25 usec  
PLW1 19.95299911 W

F2 - Processing parameters  
SI 16384  
SF 400.2000000 MHz  
WDW EM  
SSB 0  
LB 0.30 Hz  
GB 0  
PC 1.00

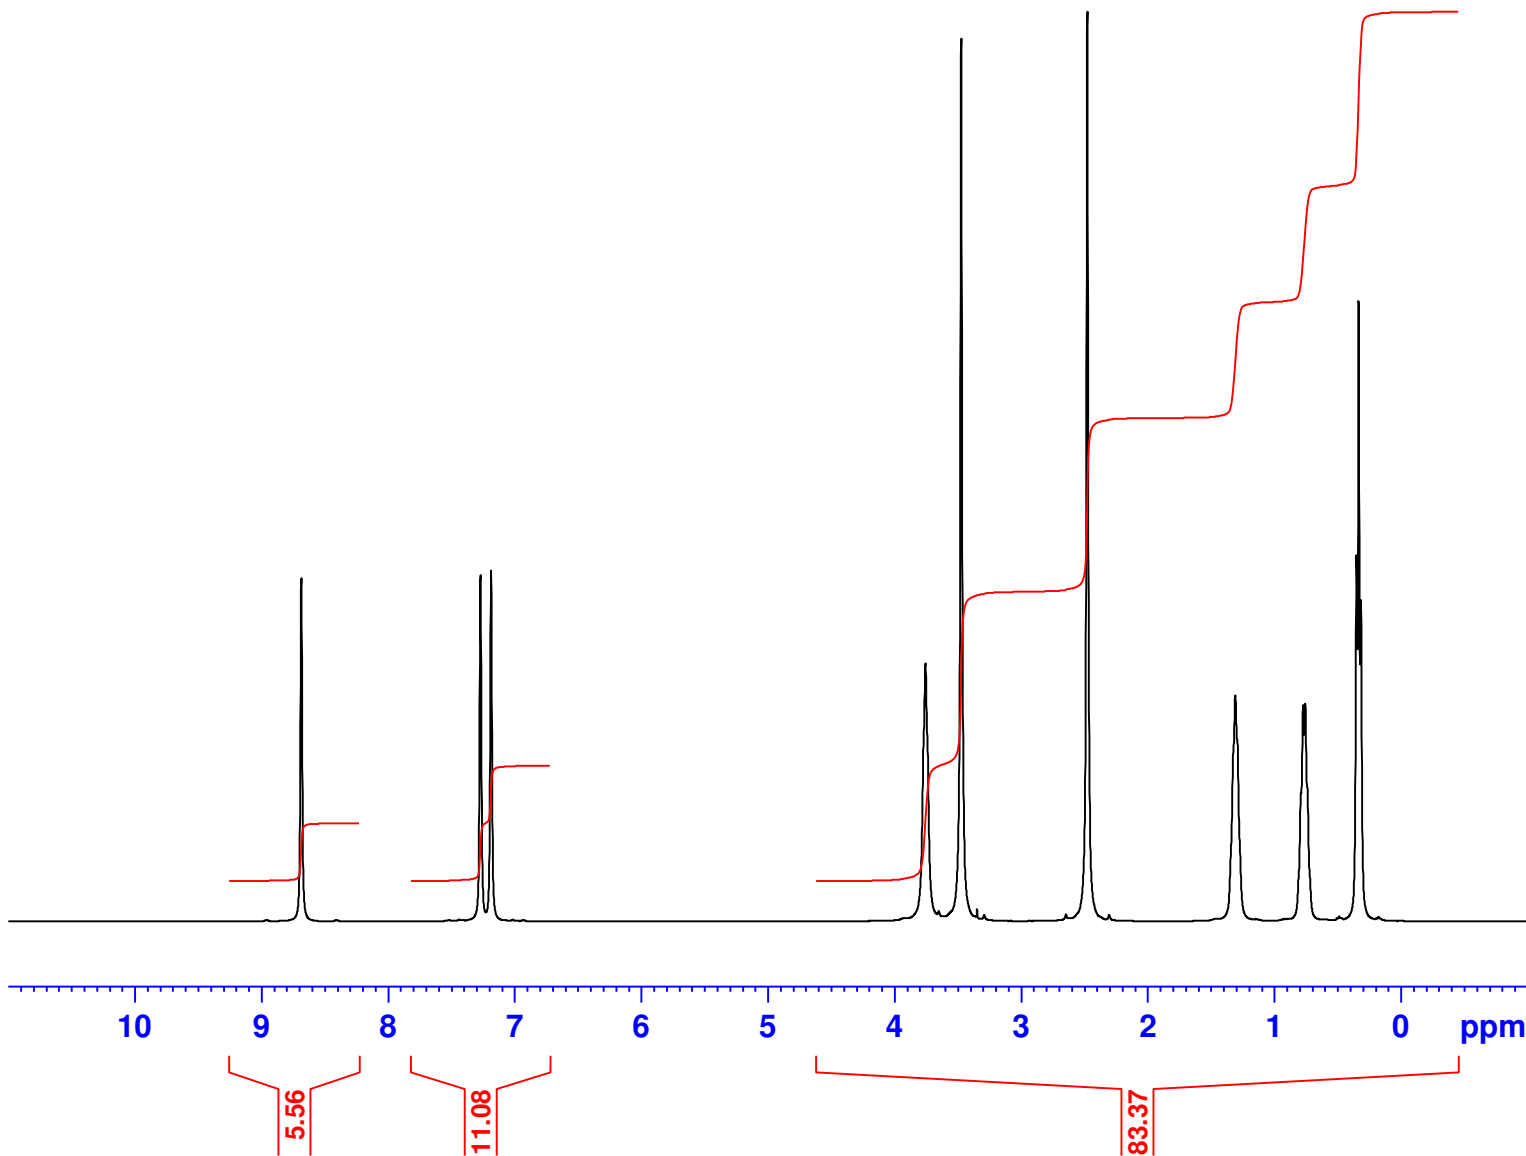

Supplement: d0sc01379j2.zip [file d0sc01379j2.zip]
