# Supplementary material for: Conformational design concepts for anions in ionic liquids
Source: Royal Society of Chemistry journal article supplement (doi:10.1039/d0sc01379j), 2020-01-01

Nov15-2019.10.fid  
FPB282 Youngs Tap tube of BMIM MsNTFA, 1H  
1D  
DMSO\_weak

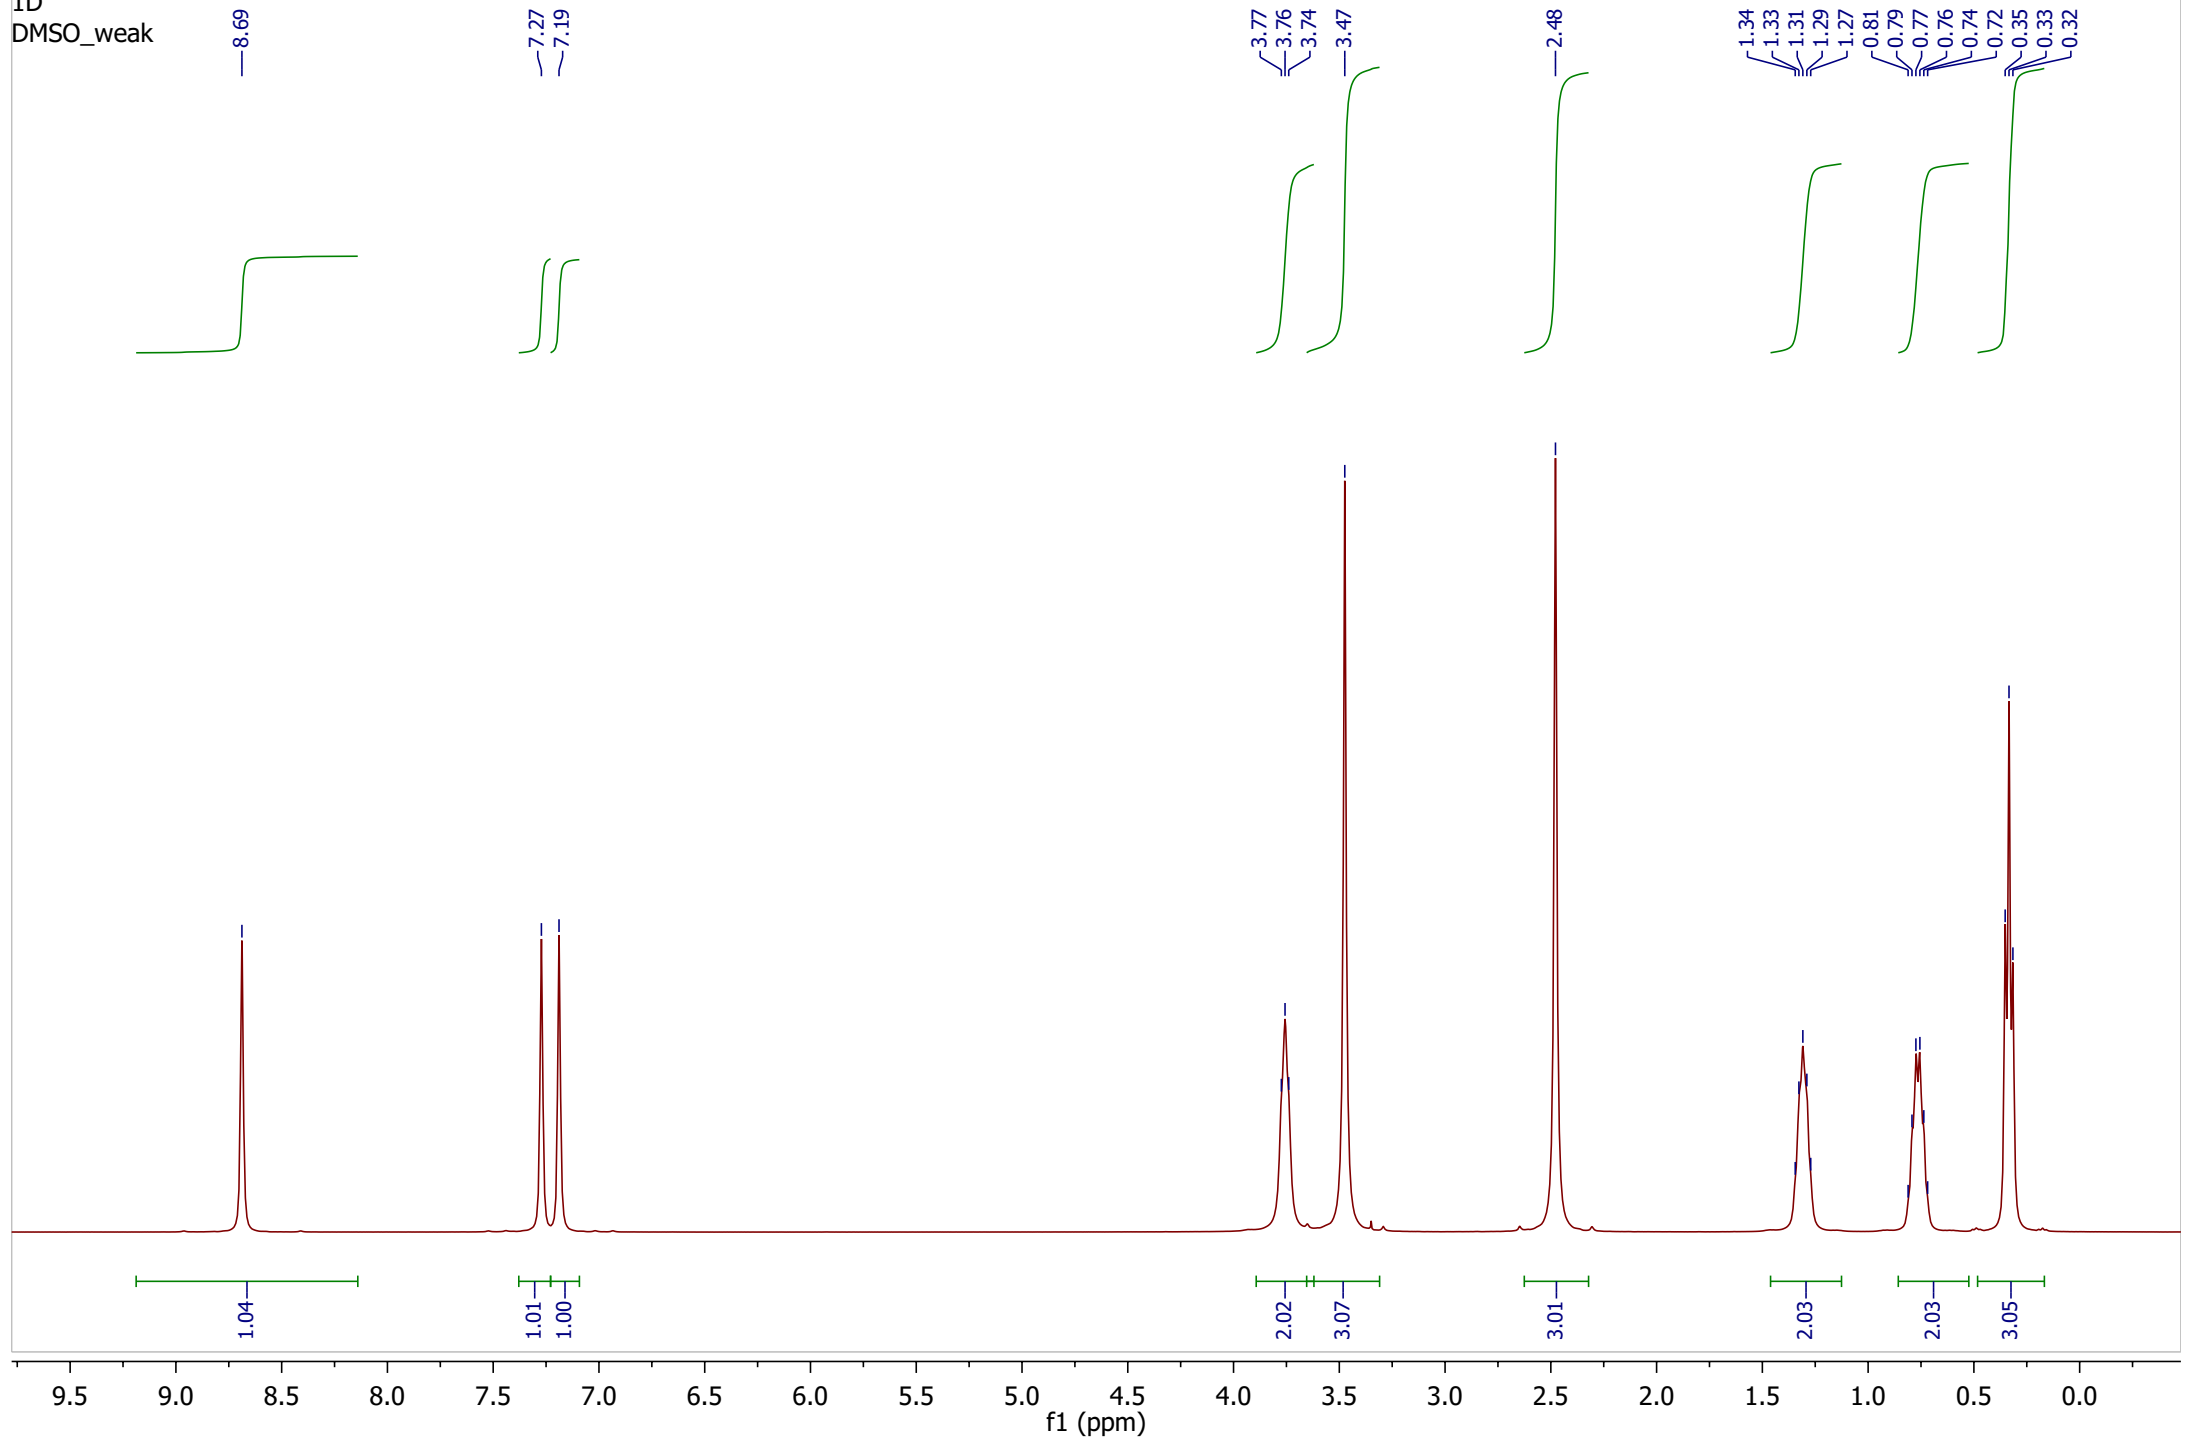

Nov15-2019.12.fid  
FPB282 Youngs Tap tube of BMIM MsNTFA, 13C  
1D  
DMSO\_weak

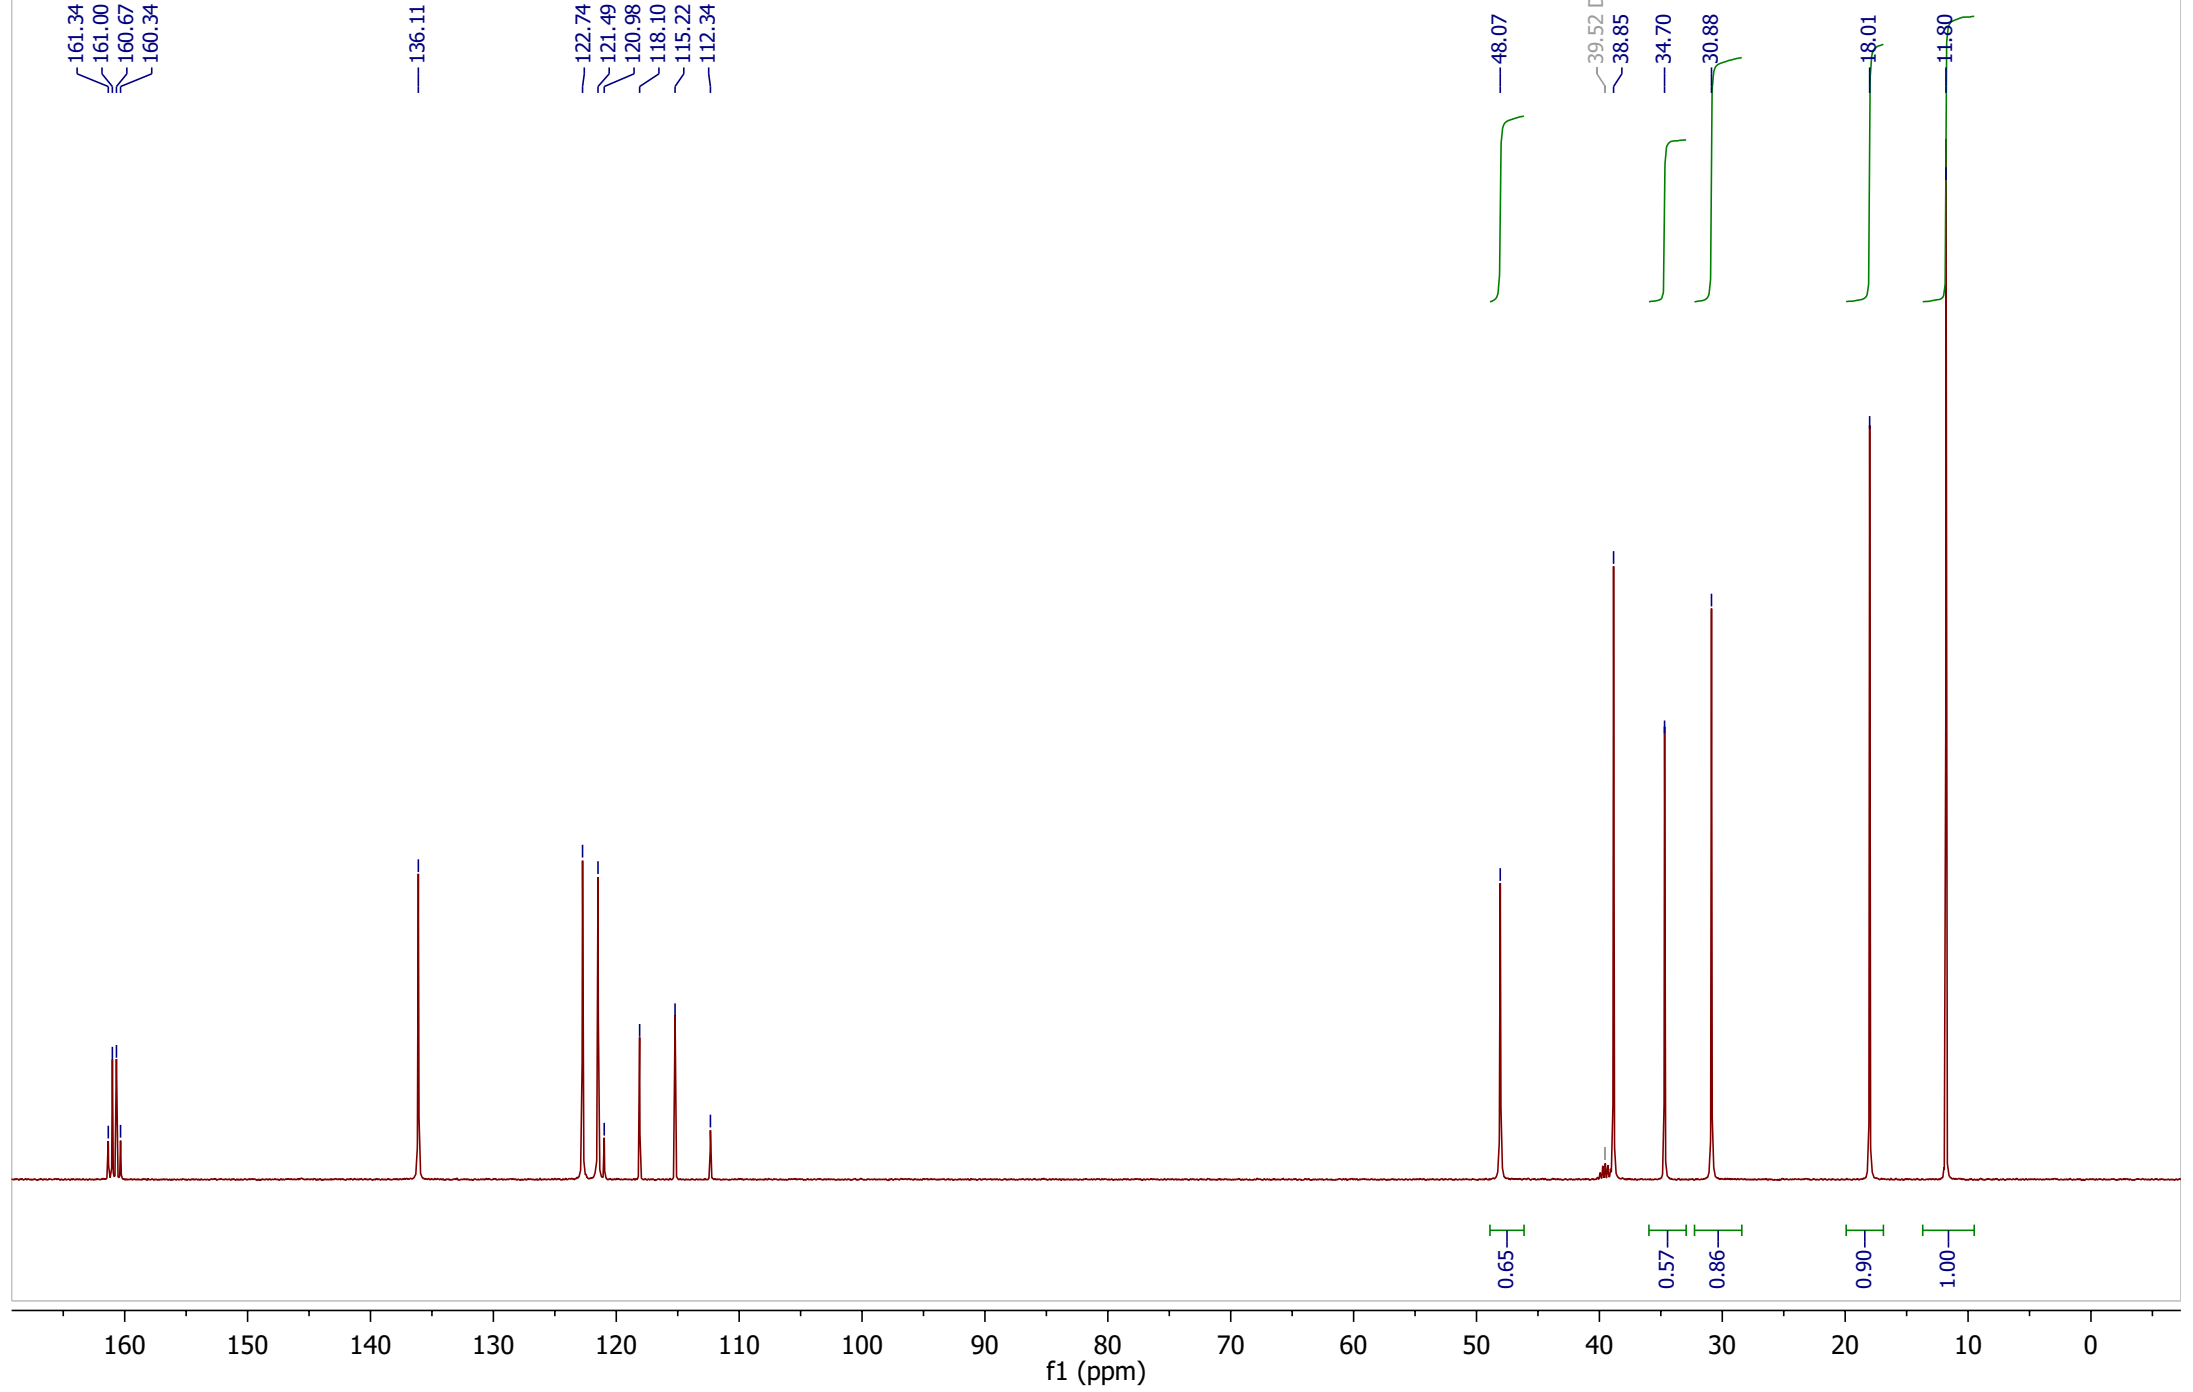

Nov15-2019.11.fid  
FPB282 Youngs Tap tube of BMIM MsNTFA, 19F  
1D  
DMSO\_weak

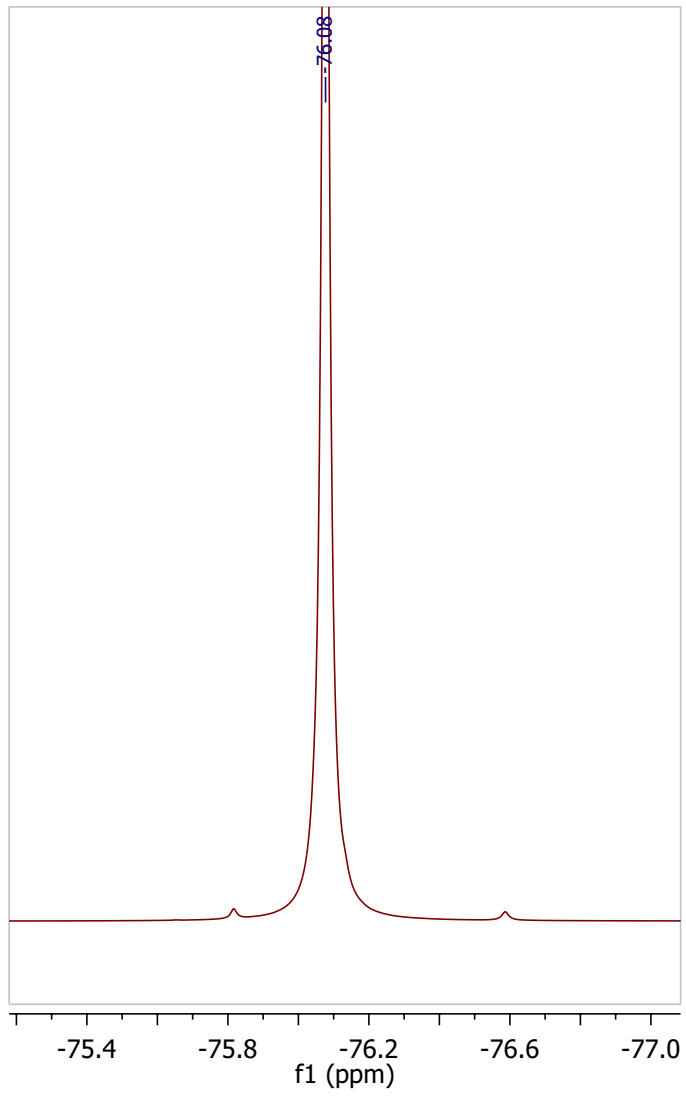

76.08

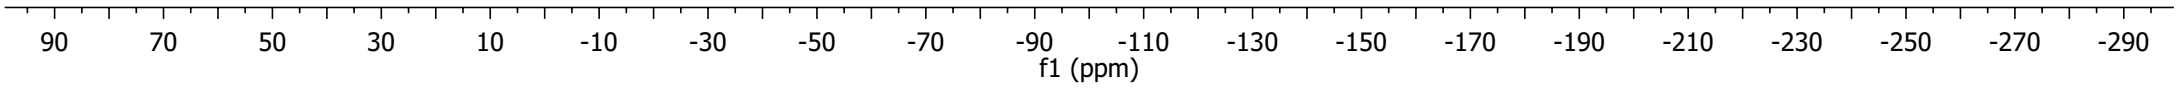

Supplement: d0sc01379j2.zip [file d0sc01379j2.zip]
