# Supplementary material for: Conformational design concepts for anions in ionic liquids
Source: Royal Society of Chemistry journal article supplement (doi:10.1039/d0sc01379j), 2020-01-01
Supplement: d0sc01379j2.zip [file d0sc01379j2.zip]

**Av-400C**

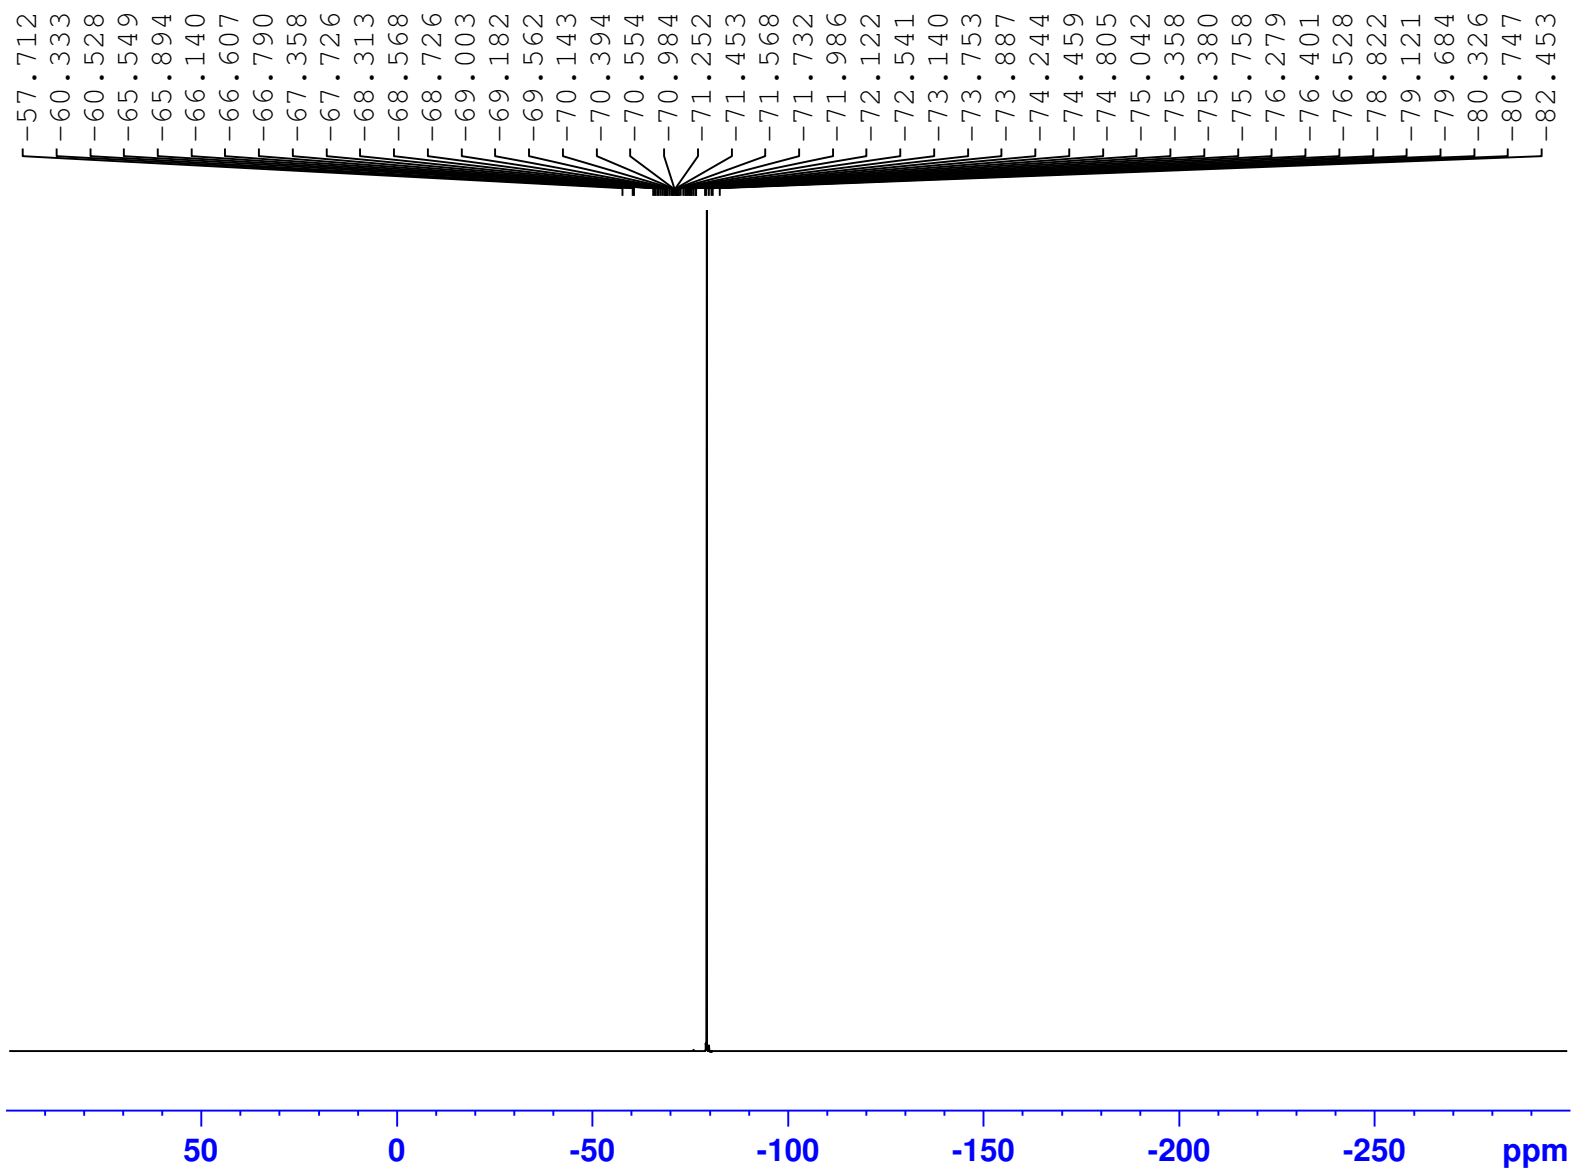

-57.712  
 -60.333  
 -60.528  
 -65.549  
 -65.894  
 -66.140  
 -66.607  
 -66.790  
 -67.358  
 -67.726  
 -68.313  
 -68.568  
 -68.726  
 -69.003  
 -69.182  
 -69.562  
 -70.143  
 -70.394  
 -70.554  
 -70.984  
 -71.252  
 -71.453  
 -71.568  
 -71.732  
 -71.986  
 -72.122  
 -72.541  
 -73.140  
 -73.753  
 -73.887  
 -74.244  
 -74.459  
 -74.805  
 -75.042  
 -75.358  
 -75.380  
 -75.758  
 -76.279  
 -76.401  
 -76.528  
 -78.822  
 -79.121  
 -79.684  
 -80.326  
 -80.747  
 -82.453

Current Data Parameters  
 NAME Oct29-2019  
 EXPNO 41  
 PROCNO 1

F2 - Acquisition Parameters  
 Date\_ 20191029  
 Time 17.48  
 INSTRUM spect  
 PROBHD 5 mm PABBO BB/  
 PULPROG zgflqn  
 TD 131072  
 SOLVENT DMSO\_weak  
 NS 16  
 DS 4  
 SWH 150000.000 Hz  
 FIDRES 1.144409 Hz  
 AQ 0.4369067 sec  
 RG 199.33  
 DW 3.333 usec  
 DE 6.50 usec  
 TE 294.2 K  
 D1 1.00000000 sec  
 TD0 1

==== CHANNEL f1 =====  
 SFO1 376.5265756 MHz  
 NUC1 19F  
 P1 12.00 usec  
 PLW1 25.11899948 W

F2 - Processing parameters  
 SI 131072  
 SF 376.5642320 MHz  
 WDW EM  
 SSB 0  
 LB 3.00 Hz  
 GB 0  
 PC 1.00
