# Supplementary material for: Conformational design concepts for anions in ionic liquids
Source: Royal Society of Chemistry journal article supplement (doi:10.1039/d0sc01379j), 2020-01-01

Oct29-2019.40.fid  
FPB278 Youngs Tap tube of BMIM TfNAC, 1H  
1D  
DMSO\_weak

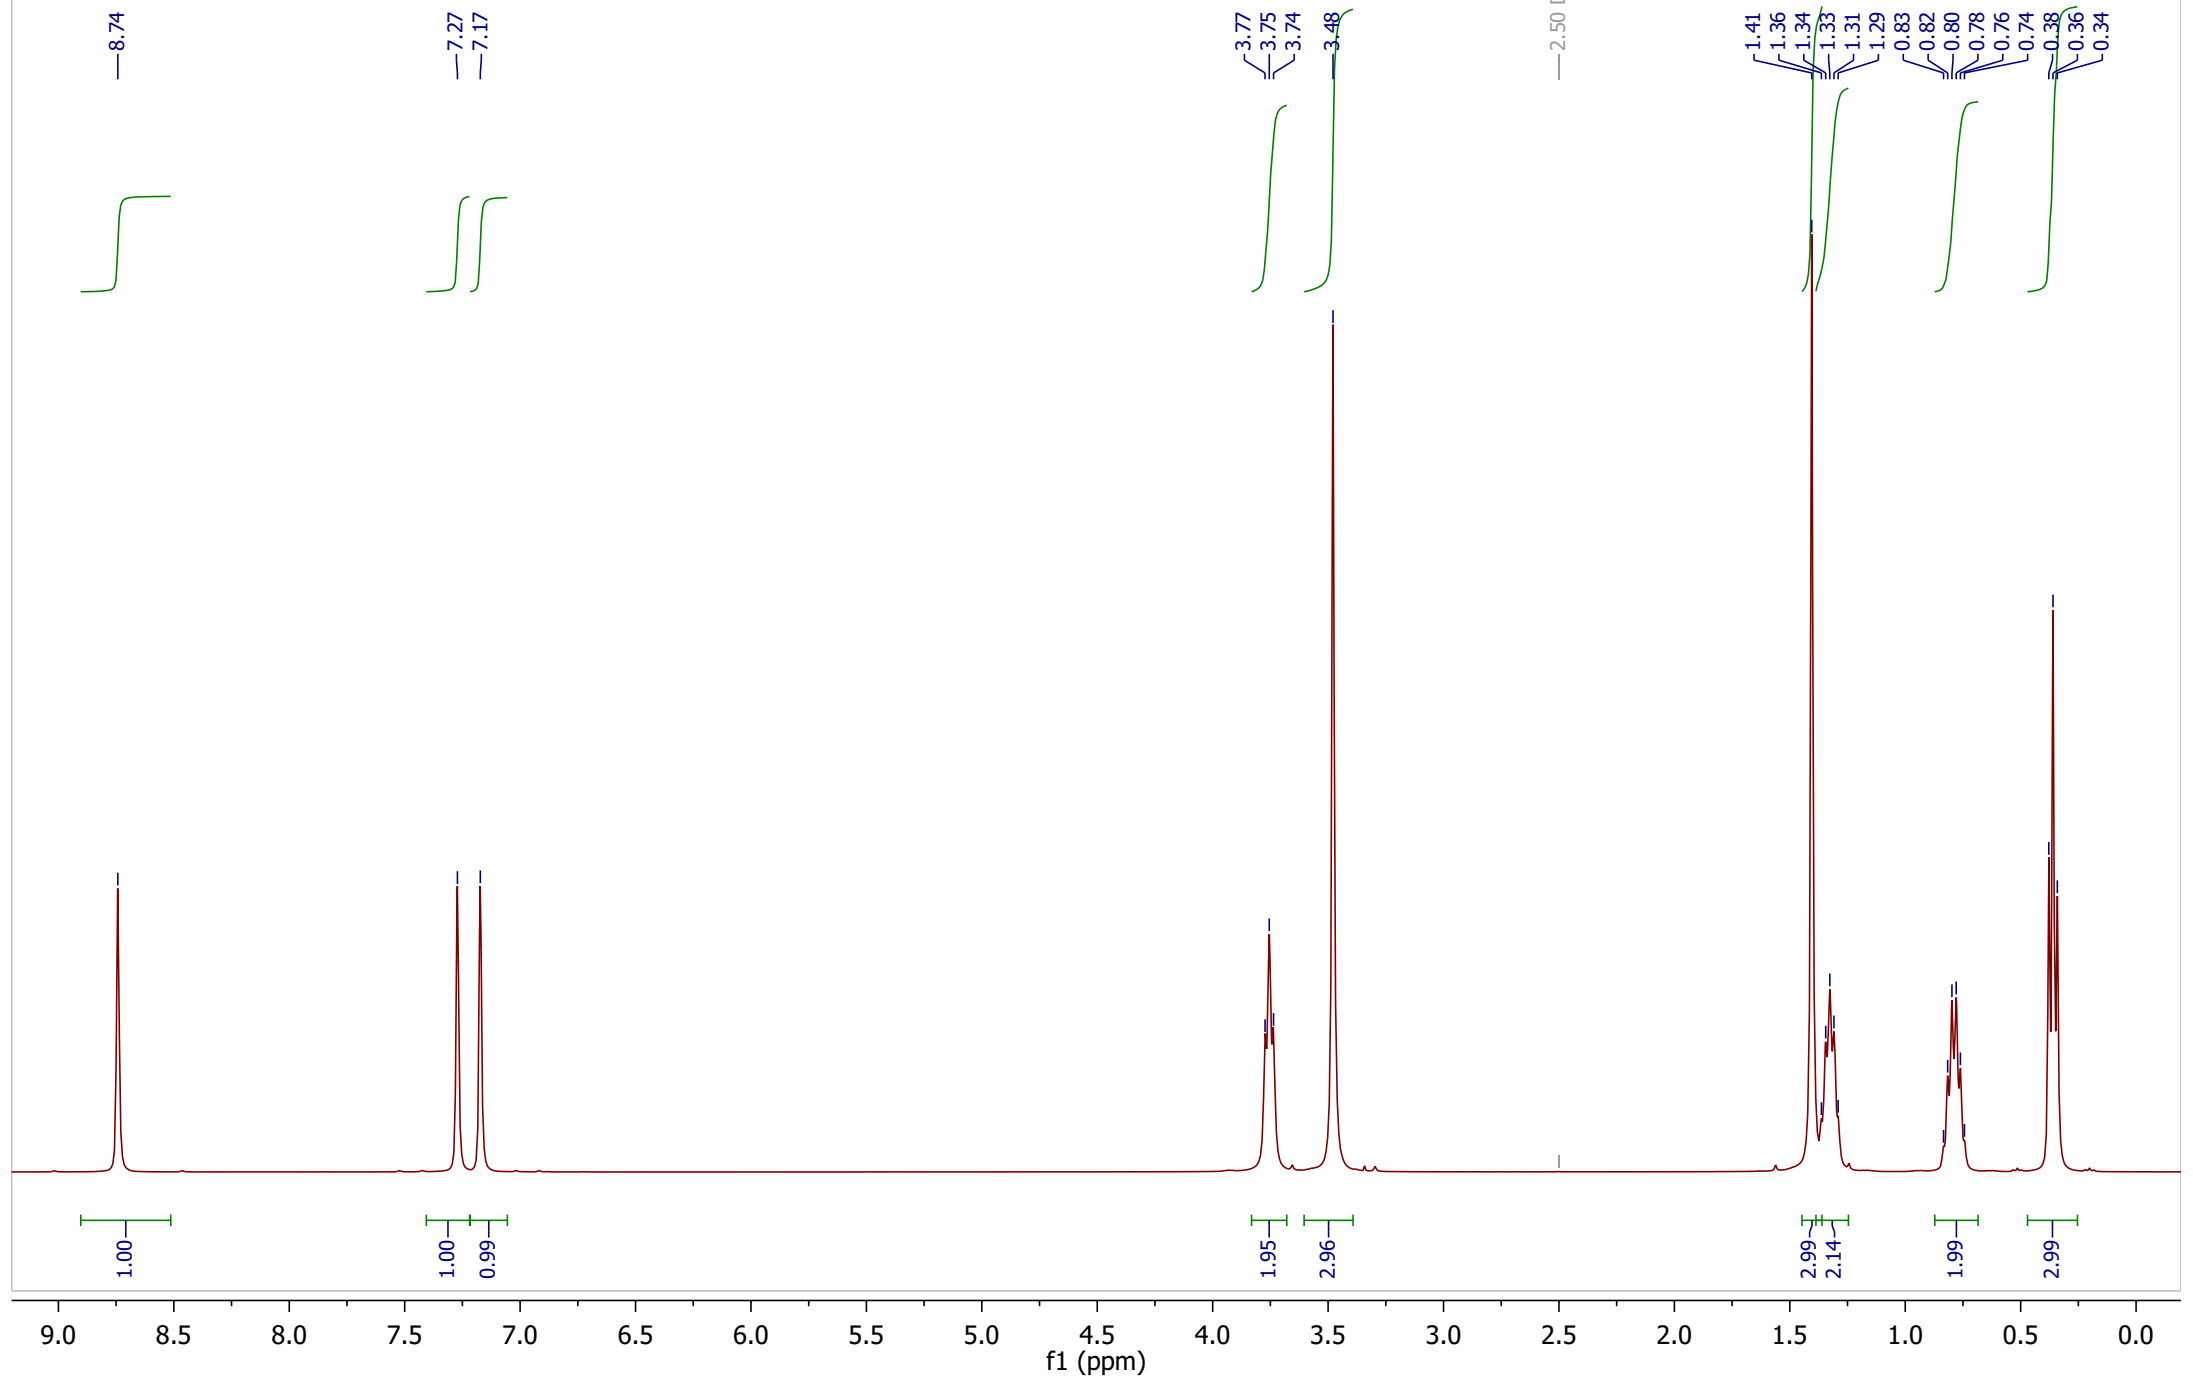

Oct29-2019.41.fid  
FPB278 Youngs Tap tube of BMIM TfNAC, 19F  
1D  
DMSO\_weak

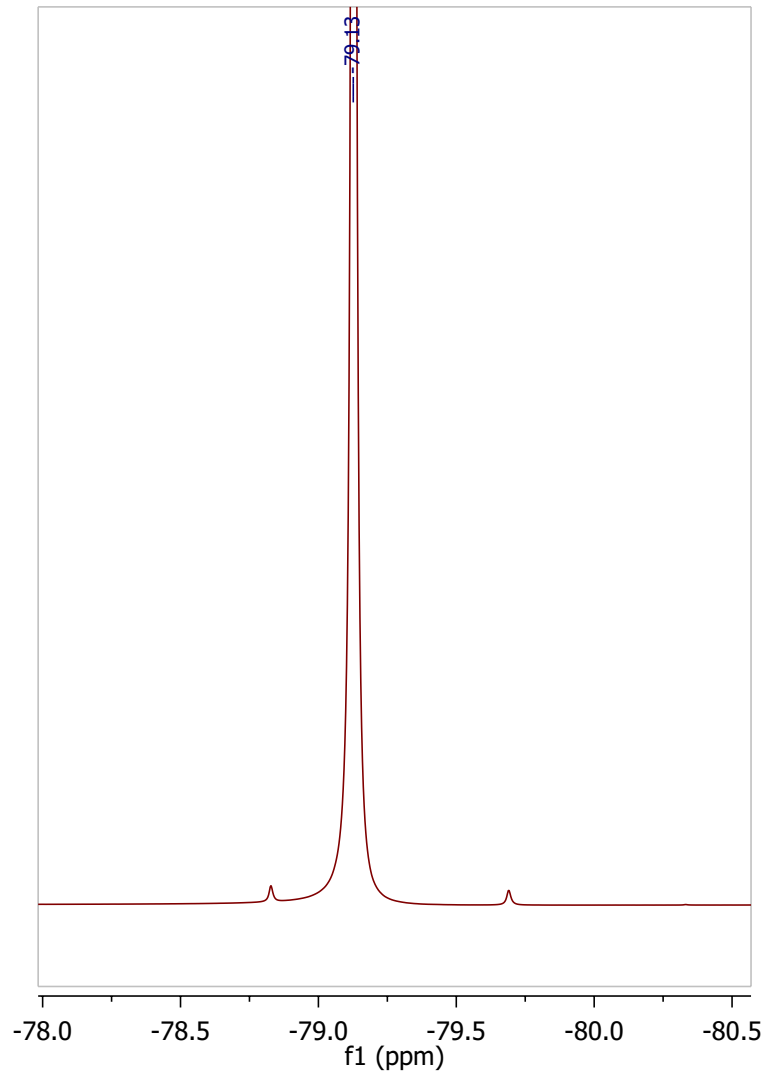

79.13

79.13

f1 (ppm)

f1 (ppm)

90 70 50 30 10 -10 -30 -50 -70 -90 -110 -130 -150 -170 -190 -210 -230 -250 -270 -290

Oct29-2019.42.fid  
FPB278 Youngs Tap tube of BMIM TfNac, 13C  
1D  
DMSO\_weak

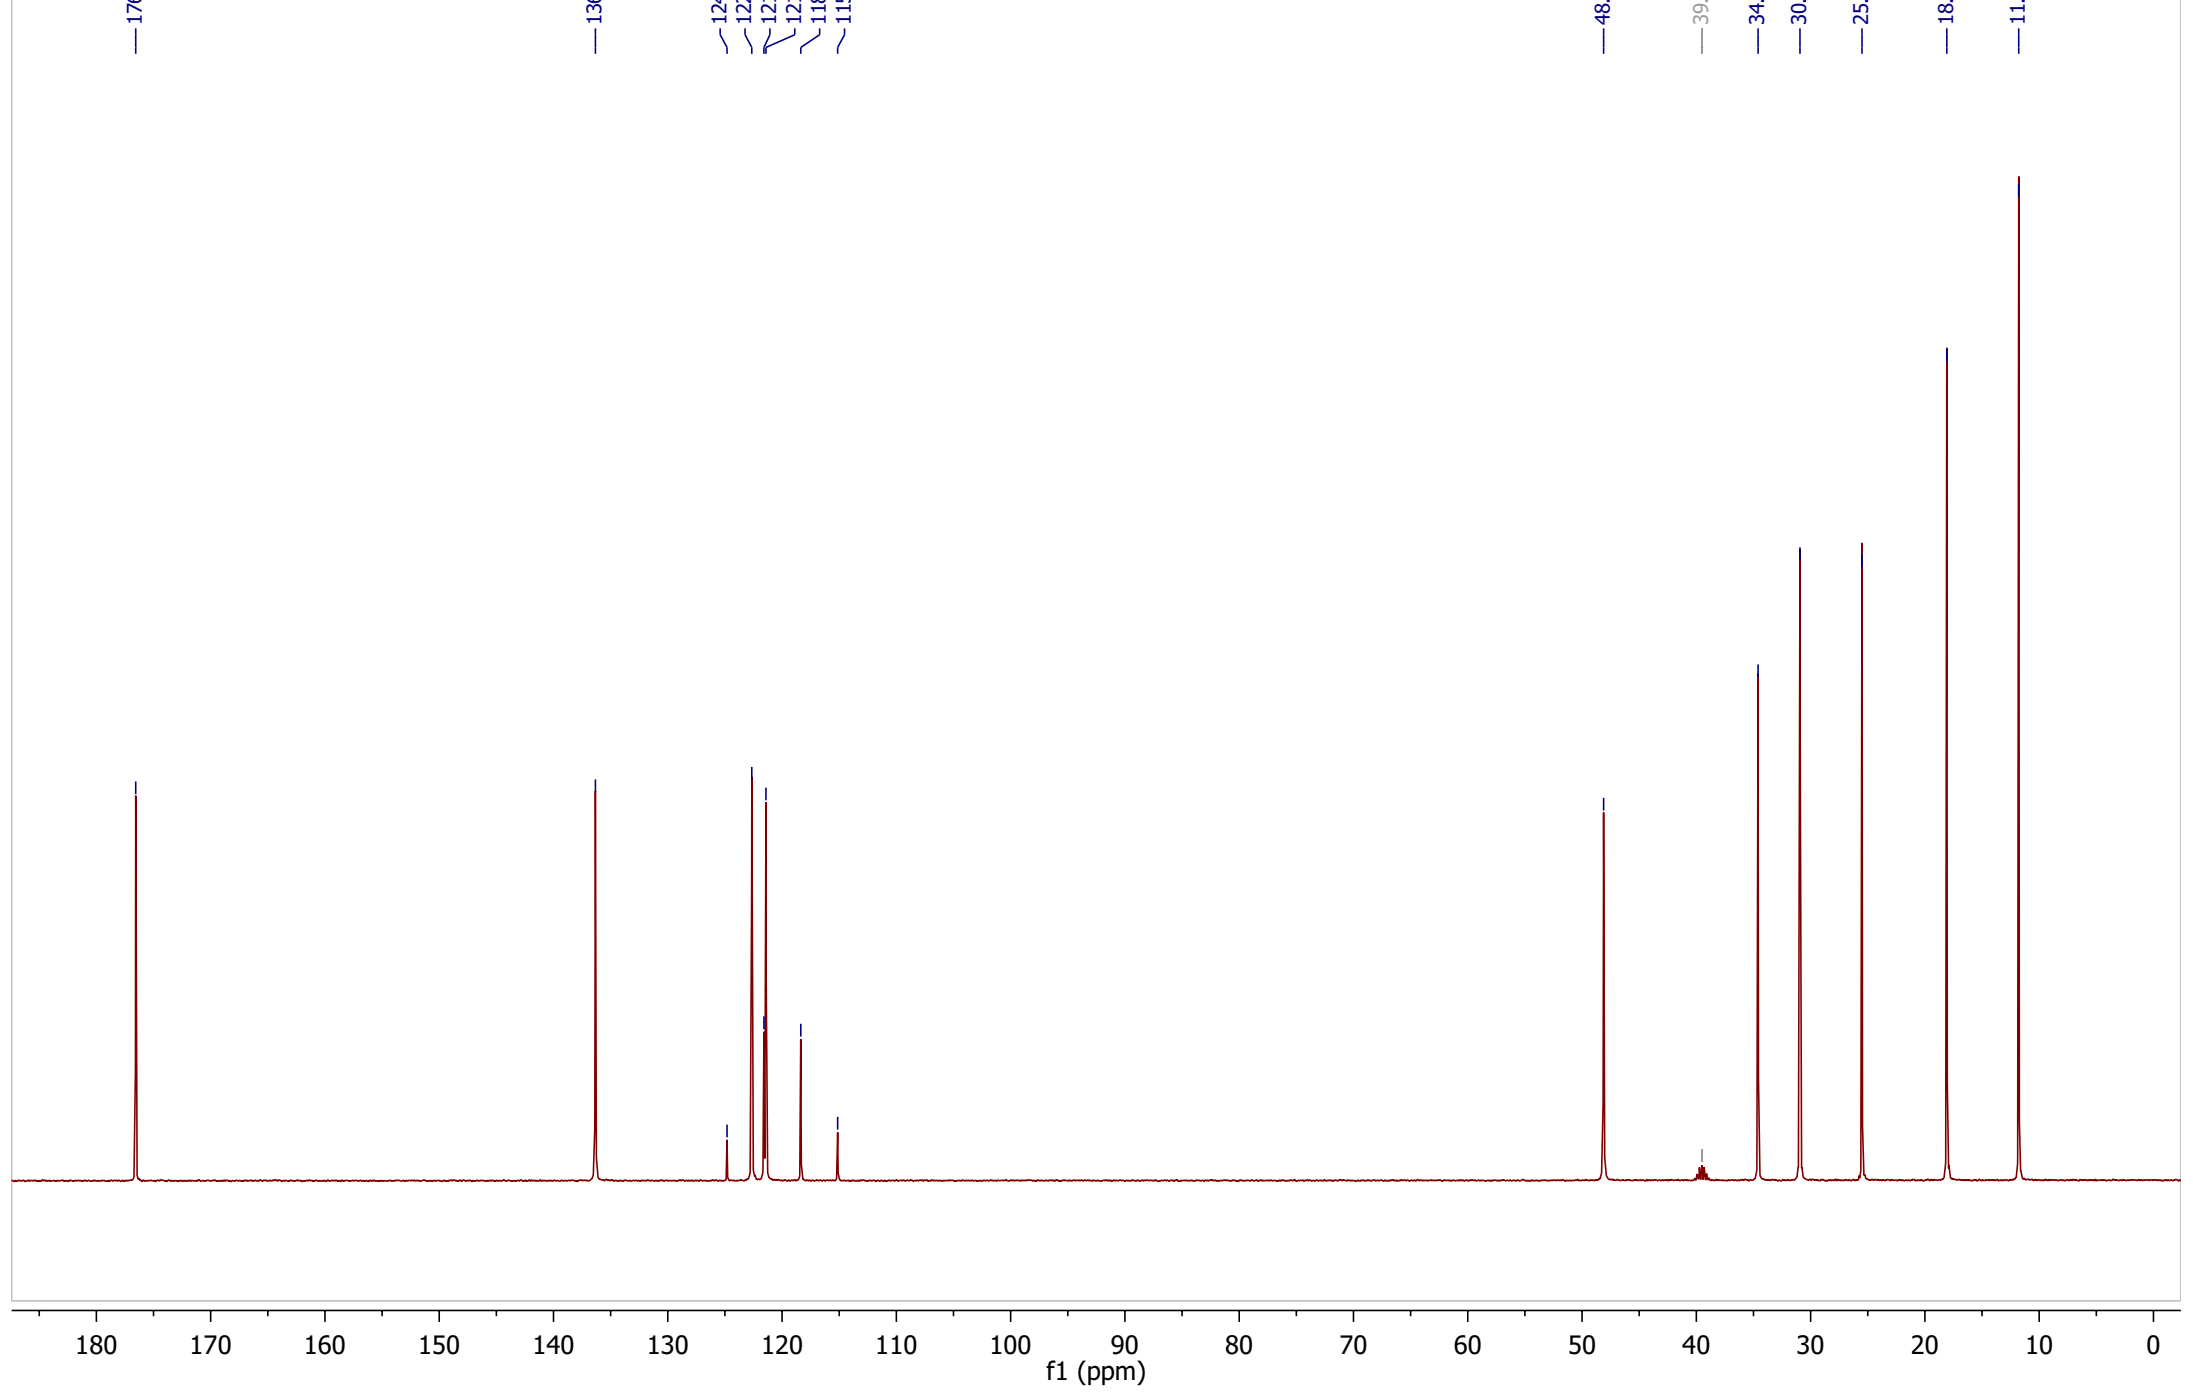

Supplement: d0sc01379j2.zip [file d0sc01379j2.zip]
