# Supplementary material for: Conformational design concepts for anions in ionic liquids
Source: Royal Society of Chemistry journal article supplement (doi:10.1039/d0sc01379j), 2020-01-01
Supplement: d0sc01379j2.zip [file d0sc01379j2.zip]

**Av-400C**

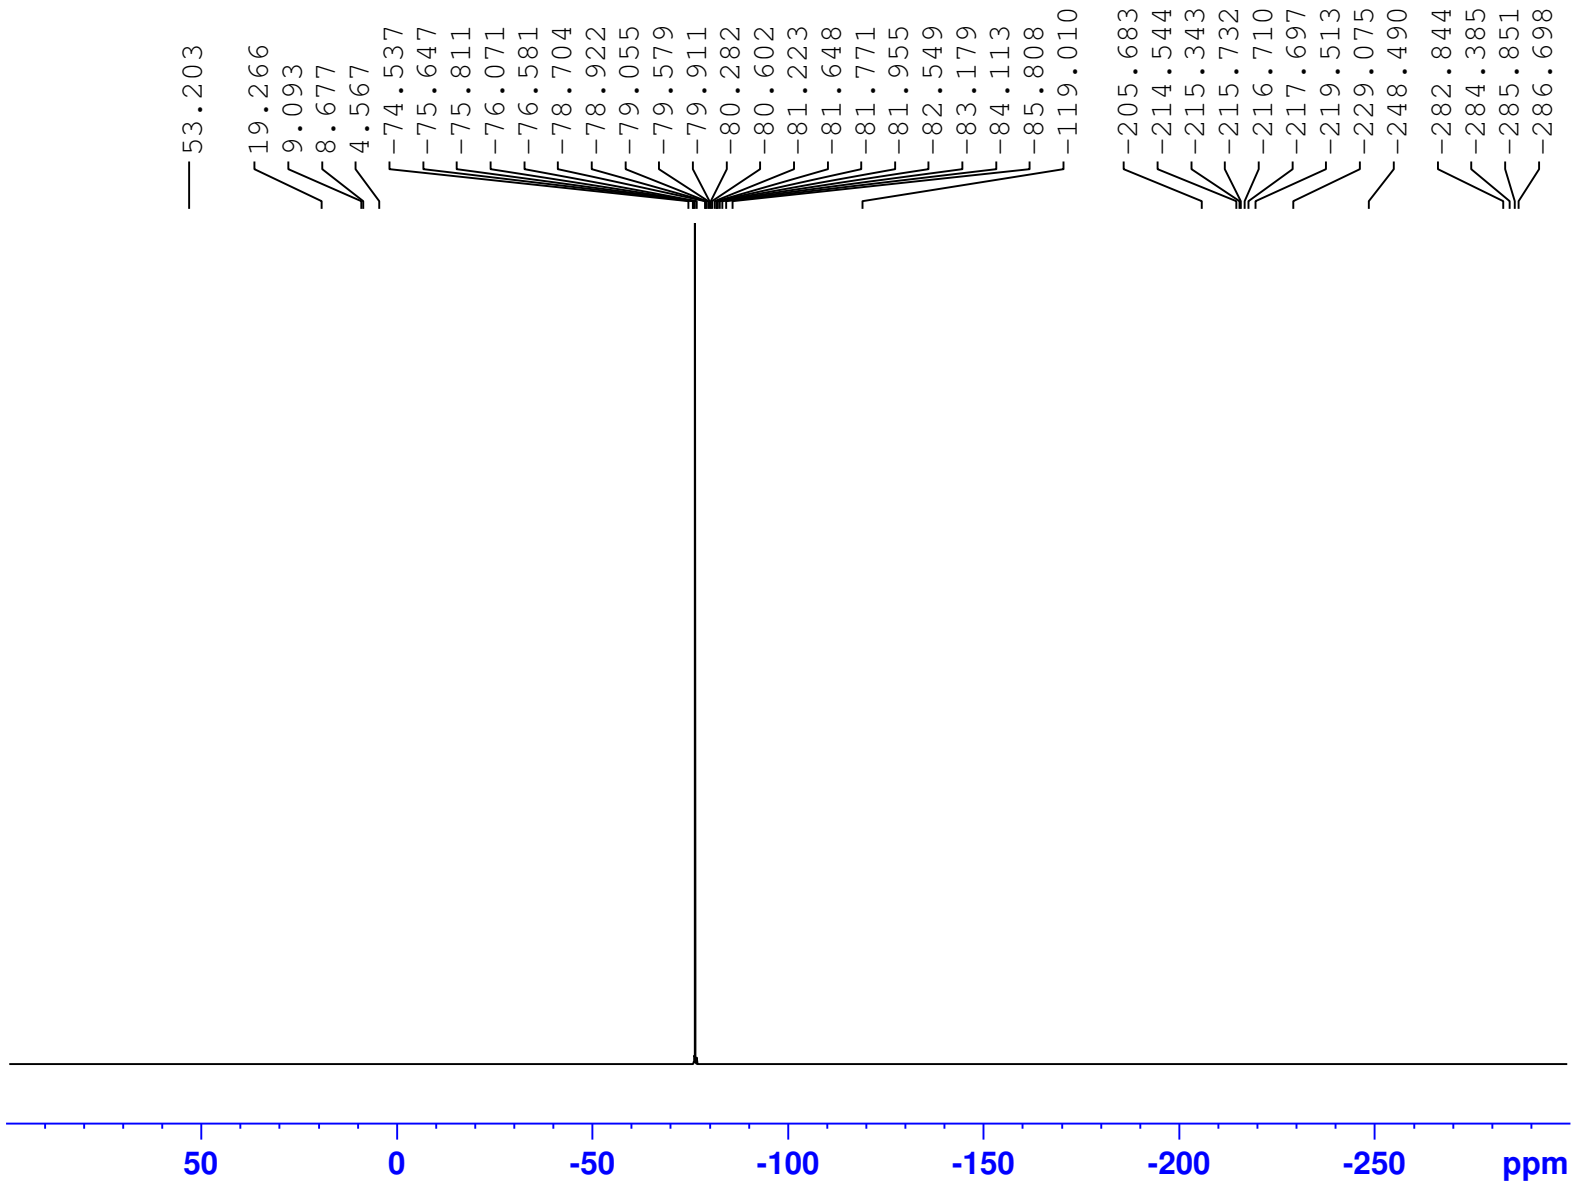

Current Data Parameters  
 NAME Nov15-2019  
 EXPNO 11  
 PROCNO 1

F2 - Acquisition Parameters  
 Date\_ 20191115  
 Time 12.06  
 INSTRUM spect  
 PROBHD 5 mm PABBO BB/  
 PULPROG zgflqn  
 TD 131072  
 SOLVENT DMSO\_weak  
 NS 16  
 DS 4  
 SWH 150000.000 Hz  
 FIDRES 1.144409 Hz  
 AQ 0.4369067 sec  
 RG 199.33  
 DW 3.333 usec  
 DE 6.50 usec  
 TE 294.1 K  
 D1 1.00000000 sec  
 TD0 1

==== CHANNEL f1 =====  
 SFO1 376.5265756 MHz  
 NUC1 19F  
 P1 12.00 usec  
 PLW1 25.11899948 W

F2 - Processing parameters  
 SI 131072  
 SF 376.5642320 MHz  
 WDW EM  
 SSB 0  
 LB 3.00 Hz  
 GB 0  
 PC 1.00
