# Supplementary material for: Conformational design concepts for anions in ionic liquids
Source: Royal Society of Chemistry journal article supplement (doi:10.1039/d0sc01379j), 2020-01-01
Supplement: d0sc01379j2.zip [file d0sc01379j2.zip]

# Av-400C

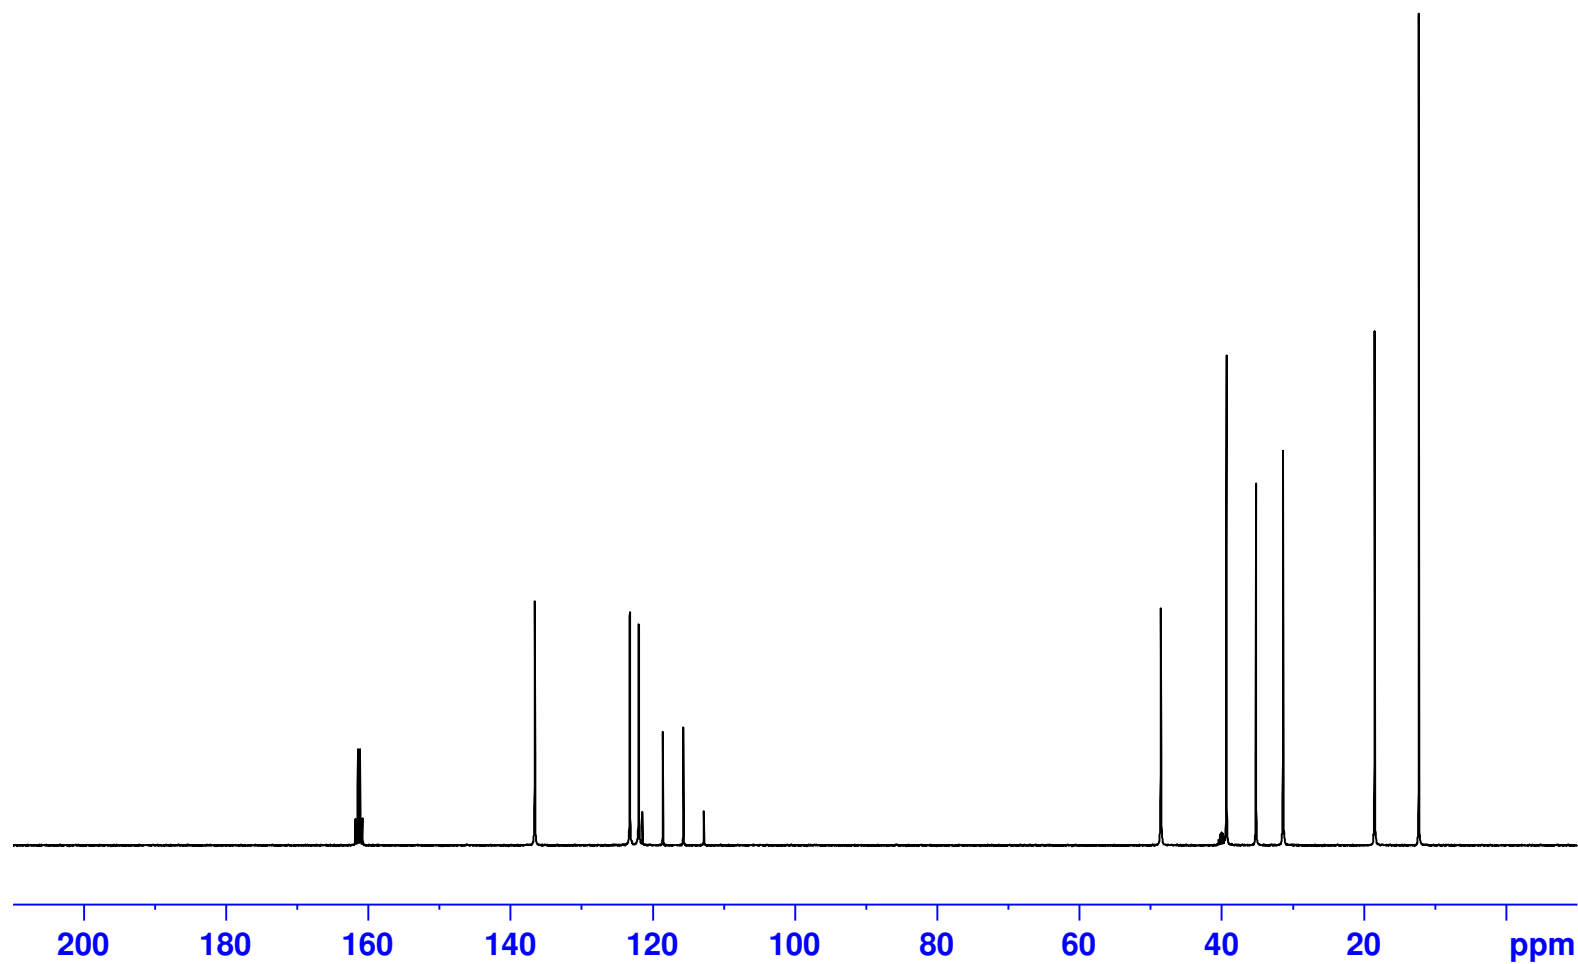

Current Data Parameters  
 NAME Nov15-2019  
 EXPNO 12  
 PROCNO 1

F2 - Acquisition Parameters  
 Date\_ 20191116  
 Time 1.32  
 INSTRUM spect  
 PROBHD 5 mm PABBO BB/  
 PULPROG zgpg30  
 TD 32768  
 SOLVENT DMSO\_weak  
 NS 1200  
 DS 4  
 SWH 28409.092 Hz  
 FIDRES 0.866977 Hz  
 AQ 0.5767168 sec  
 RG 199.33  
 DW 17.600 usec  
 DE 6.50 usec  
 TE 295.6 K  
 D1 1.00000000 sec  
 D11 0.03000000 sec  
 TD0 1

==== CHANNEL f1 =====  
 SFO1 100.6414394 MHz  
 NUC1 13C  
 P1 9.05 usec  
 PLW1 60.25600052 W

==== CHANNEL f2 =====  
 SFO2 400.2020010 MHz  
 NUC2 1H  
 CPDPRG[2] waltz16  
 PCPD2 90.00 usec  
 PLW2 19.95299911 W  
 PLW12 0.33147001 W  
 PLW13 0.26848999 W

F2 - Processing parameters  
 SI 16384  
 SF 100.6303700 MHz  
 WDW EM  
 SSB 0  
 LB 2.00 Hz  
 GB 0  
 PC 1.40
