# Supplementary material for: Conformational design concepts for anions in ionic liquids
Source: PubMed Central journal article supplement — Chem Sci. 2020 May 26;11(25):6405–22. doi: 10.1039/d0sc01379j (PMC8959527; doi:10.1039/d0sc01379j), 2020-05-26
Supplement: SC-011-D0SC01379J-s001.pdf [file SC-011-D0SC01379J-s001.pdf]

Electronic Supporting Information to:

Conformational Design Concepts for Anions in Ionic Liquids

Frederik Philippi,<sup>a</sup> David Pugh,<sup>a,b</sup> Daniel Rauber,<sup>c</sup> Tom Welton,<sup>a</sup> and  
Patricia A. Hunt <sup>\*a</sup>

- a. Department of Chemistry, Molecular Sciences Research Hub, Imperial College London, White City Campus, London W12 0BZ, United Kingdom.
- b. Department of Chemistry, Britannia House, 7 Trinity Street, London SE1 1DB, United Kingdom.
- c. Department of Chemistry, Saarland University, 66123, Saarbrücken, Germany

# Contents

|     |                                                                                                           |    |
|-----|-----------------------------------------------------------------------------------------------------------|----|
| 1.  | Additional syntheses and crystal growth .....                                                             | 1  |
| 1.1 | N-(methylsulfonyl)acetamide [H][N(Ms)(Ac)].....                                                           | 1  |
| 1.2 | Tetramethylammonium bis(trifluoromethylsulfonyl)methanide [NMe <sub>4</sub> ][CH(Tf) <sub>2</sub> ] ..... | 1  |
| 1.3 | N-((trifluoromethyl)sulfonyl)acetamide [H][N(Tf)(Ac)].....                                                | 1  |
| 1.4 | Potassium acetyl(trifluoromethylsulfonyl) amide [K][N(Tf)(Ac)] .....                                      | 1  |
| 1.5 | 2,2,2-trifluoro-N-(methylsulfonyl)acetamide [H][N(Ms)(TFA)].....                                          | 1  |
| 2.  | Crystallography .....                                                                                     | 2  |
| 3.  | Rheology .....                                                                                            | 4  |
| 4.  | Benchmark .....                                                                                           | 5  |
| 4.1 | Energy .....                                                                                              | 5  |
| 4.2 | Geometry .....                                                                                            | 8  |
| 5.  | Additional molecular orbitals.....                                                                        | 11 |
| 6.  | Key structures .....                                                                                      | 11 |
| 7.  | NBO charges.....                                                                                          | 12 |
| 8.  | Stationary points.....                                                                                    | 12 |
| 9.  | Potential energy surfaces.....                                                                            | 14 |
| 10. | NMR spectra of neat ILs.....                                                                              | 27 |
| 11. | NMR spectra of precursors .....                                                                           | 30 |
| 12. | References .....                                                                                          | 36 |

# 1. Additional syntheses and crystal growth

## 1.1 N-(methylsulfonyl)acetamide [H][N(Ms)(Ac)]

[H][N(Ms)(Ac)] was synthesized via a modification of the literature route.<sup>1</sup> Methanesulfonamide (4.48 g, 47.0 mmol) was dissolved in MeCN (70 mL) under an inert atmosphere. Acetic anhydride (6.7 mL, 70.5 mmol) was added dropwise, followed by concentrated H<sub>2</sub>SO<sub>4</sub> (136 mg, 1.4 mmol) and the reaction was stirred at 60 °C for 16 hours. After this time the reaction was cooled and volatiles removed *in vacuo*. Water (15 mL) was added then the reaction was extracted with Et<sub>2</sub>O (3 x 50 mL). The organic fractions were combined, dried (MgSO<sub>4</sub>), filtered and concentrated to dryness. The title compound was isolated as a white solid (5.73 g, 89% yield). Crystals were obtained by recrystallization from hot Et<sub>2</sub>O.

## 1.2 Tetramethylammonium bis(trifluoromethylsulfonyl)methanide [NMe<sub>4</sub>][CH(Tf)<sub>2</sub>]

415 mg Methylene ditriflone (1.48 mmol / 1.01 eq) were dissolved in 3 mL water + 3 mL MeOH and cooled to 0°C. To the resulting suspension were added 616 µL tetramethylammonium hydroxide solution 25% (133 mg / 1.46 mmol / 1.00 eq) in methanol. The reaction mixture was stirred until homogeneous, and then dried in high vacuum to yield 522 mg of the title compound (1.47 mmol / qualitative yield). Crystals were obtained by slow evaporation of a solution in methylene chloride. Commercially available methylene ditriflone (ABCR, Karlsruhe, Germany) should be resublimed prior to its use.

## 1.3 N-((trifluoromethyl)sulfonyl)acetamide [H][N(Tf)(Ac)]

Crystals of [H][N(Tf)(Ac)] were obtained interdiffusion of Hexane (antisolvent) into a solution of the free acid in diethyl ether (solvent) at 4°C.

## 1.4 Potassium acetyl(trifluoromethylsulfonyl) amide [K][N(Tf)(Ac)]

[K][N(Tf)(Ac)] was prepared analogous to [Na][N(Tf)(Ac)] in the main paper, using potassium hydrogen carbonate as base. Crystals were obtained from interdiffusion of diethyl ether (antisolvent) into a solution of the potassium salt in acetonitrile (solvent) at 4°C.

## 1.5 2,2,2-trifluoro-N-(methylsulfonyl)acetamide [H][N(Ms)(TFA)]

Crystals of [H][N(Ms)(TFA)] were obtained by slow evaporation from acetonitrile.

## 2. Crystallography

Datasets were collected using an Oxford Diffraction Xcalibur 3E (Mo  $K_{\alpha}$  radiation, 0.71073 Å) at 173.0(1) K. Data processing was carried out using CrysAlisPro,<sup>2</sup> solutions were solved and refined using SHELX-97 and SHELXTL,<sup>3</sup> as well as Olex-2,<sup>4</sup> and WinGX.<sup>5</sup> Hydrogen atoms bonded to carbon were placed in geometrically assigned positions with C–H distances of 0.98 Å (CH<sub>3</sub>) and refined using a riding model, with  $U_{\text{iso}}(\text{H}) = 1.5 U_{\text{eq}}(\text{C})$  (CH<sub>3</sub>). Hydrogen atoms bonded to nitrogen were added as idealised protons. CCDC reference numbers 1981615 ([H][N(Tf)(Ac)]), 1981616 ([K][N(Tf)(Ac)]), 1981617 ([H][N(Ms)(TFA)]), 1981618 ([H][N(Ms)(Ac)]) and 1981619 ([NMe<sub>4</sub>][CH(Tf)<sub>2</sub>]) contain crystallographic data in CIF format, which is also summarized below, Table 1.

HNMSTFA was modelled as a two component twin in a ca. 47:53 ratio, with the two major lattices related by the approximate twin law [-1.00 0.00 0.00 0.00 -1.00 0.00 0.30 0.01 1.00]. One of the CF<sub>3</sub> fluorines in KNTfAc was disordered over a symmetry operation, which necessitated the use of PART -1 instructions to successfully model.

Table 1: crystallographic data for all structures. All datasets were collected at 173.0(1) K.

| Compound                                                                                   | [H][N(Tf)(Ac)]                                                 | [K][N(Tf)(Ac)]                                                                                           | [H][N(TFA)(Ms)]                                                | [H][N(Ms)(Ac)]                                        | [NMe <sub>4</sub> ][CH(Tf) <sub>2</sub> ]                                    |
|--------------------------------------------------------------------------------------------|----------------------------------------------------------------|----------------------------------------------------------------------------------------------------------|----------------------------------------------------------------|-------------------------------------------------------|------------------------------------------------------------------------------|
| Formula                                                                                    | C <sub>3</sub> H <sub>4</sub> F <sub>3</sub> NO <sub>3</sub> S | C <sub>6</sub> H <sub>8</sub> F <sub>6</sub> K <sub>2</sub> N <sub>2</sub> O <sub>7</sub> S <sub>2</sub> | C <sub>3</sub> H <sub>4</sub> F <sub>3</sub> NO <sub>3</sub> S | C <sub>3</sub> H <sub>7</sub> NO <sub>3</sub> S       | C <sub>7</sub> H <sub>13</sub> F <sub>6</sub> NO <sub>4</sub> S <sub>2</sub> |
| <i>M</i> /g mol <sup>-1</sup>                                                              | 191.13                                                         | 476.46                                                                                                   | 191.13                                                         | 137.16                                                | 353.30                                                                       |
| Crystal system                                                                             | monoclinic                                                     | orthorhombic                                                                                             | monoclinic                                                     | orthorhombic                                          | monoclinic                                                                   |
| Space group (No.)                                                                          | <i>P</i> 2 <sub>1</sub> / <i>c</i> (14)                        | <i>Cmma</i> (67)                                                                                         | <i>P</i> 2 <sub>1</sub> / <i>c</i> (14)                        | <i>P</i> 2 <sub>1</sub> 2 <sub>1</sub> 2 <sub>1</sub> | <i>P</i> 2 <sub>1</sub> / <i>c</i> (14)                                      |
| <i>a</i> /Å                                                                                | 8.0868(5)                                                      | 8.4456(7)                                                                                                | 8.9112(10)                                                     | 8.0559(2)                                             | 27.9524(7)                                                                   |
| <i>b</i> /Å                                                                                | 9.2975(5)                                                      | 21.7761(16)                                                                                              | 5.0072(5)                                                      | 8.4221(3)                                             | 10.6367(4)                                                                   |
| <i>c</i> /Å                                                                                | 9.6955(6)                                                      | 9.0436(5)                                                                                                | 15.368(2)                                                      | 9.1633(4)                                             | 19.2552(5)                                                                   |
| $\alpha$ /°                                                                                | 90                                                             | 90                                                                                                       | 90                                                             | 90                                                    | 90                                                                           |
| $\beta$ /°                                                                                 | 95.255(5)                                                      | 90                                                                                                       | 95.041(11)                                                     | 90                                                    | 90.426(2)                                                                    |
| $\gamma$ /°                                                                                | 90                                                             | 90                                                                                                       | 90                                                             | 90                                                    | 90                                                                           |
| <i>U</i> /Å <sup>3</sup>                                                                   | 725.91(7)                                                      | 1662.5(2)                                                                                                | 683.07(14)                                                     | 621.71(4)                                             | 5724.8(3)                                                                    |
| <i>Z</i>                                                                                   | 4                                                              | 4                                                                                                        | 4                                                              | 4                                                     | 16                                                                           |
| $\mu$ (Mo- $K\alpha$ ) /mm <sup>-1</sup>                                                   | 0.463                                                          | 0.918                                                                                                    | 1.859                                                          | 0.443                                                 | 0.450                                                                        |
| <i>F</i> (000)                                                                             | 384                                                            | 952                                                                                                      | 384                                                            | 288                                                   | 2880                                                                         |
| Total reflections                                                                          | 3103                                                           | 4540                                                                                                     | 2083                                                           | 4494                                                  | 20502                                                                        |
| Unique reflections                                                                         | 1819                                                           | 1012                                                                                                     | 2083                                                           | 1620                                                  | 11490                                                                        |
| <i>R</i> <sub>int</sub>                                                                    | 0.023                                                          | 0.019                                                                                                    | 0.035                                                          | 0.024                                                 | 0.027                                                                        |
| GooF on <i>F</i> <sup>2</sup>                                                              | 1.072                                                          | 1.085                                                                                                    | 0.980                                                          | 1.102                                                 | 1.047                                                                        |
| <i>R</i> <sub>1</sub> <sup>b</sup> [ <i>I</i> <sub>o</sub> > 2σ( <i>I</i> <sub>o</sub> )]  | 0.042                                                          | 0.028                                                                                                    | 0.036                                                          | 0.030                                                 | 0.072                                                                        |
| <i>R</i> <sub>1</sub> (all data)                                                           | 0.058                                                          | 0.034                                                                                                    | 0.049                                                          | 0.032                                                 | 0.103                                                                        |
| <i>wR</i> <sub>2</sub> <sup>b</sup> [ <i>I</i> <sub>o</sub> > 2σ( <i>I</i> <sub>o</sub> )] | 0.088                                                          | 0.071                                                                                                    | 0.077                                                          | 0.071                                                 | 0.164                                                                        |
| <i>wR</i> <sub>2</sub> (all data)                                                          | 0.097                                                          | 0.075                                                                                                    | 0.080                                                          | 0.072                                                 | 0.185                                                                        |

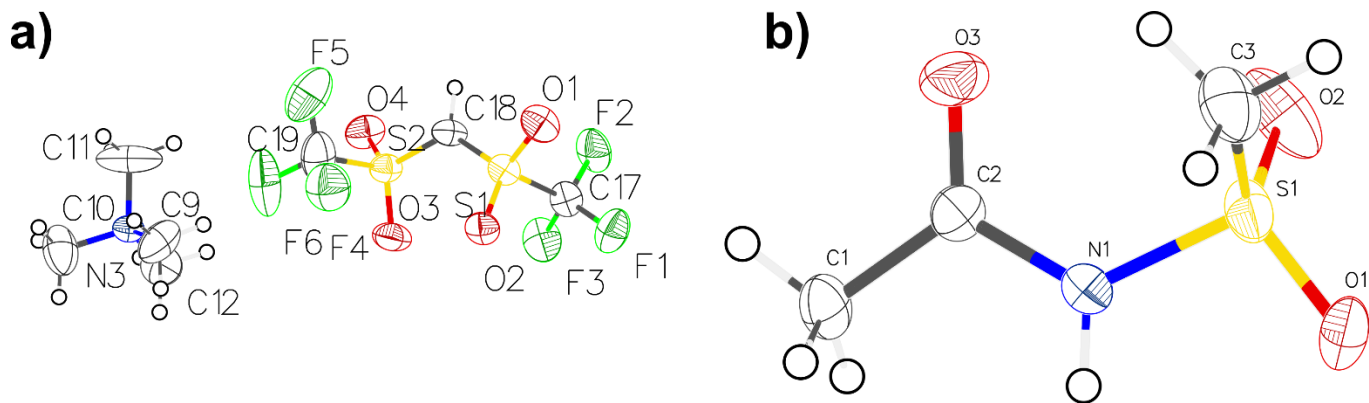

Figure 1: ORTEP plots of the additional crystal structures of a)  $[NMe_4][CH(Tf)_2]$  and b)  $[H][N(Ms)(Ac)]$ . Thermal ellipsoids at 50% probability.

The dihedral angles were read from the crystal structures for comparison with the dihedral angles obtained from the calculation, Table 2.

Table 2: Dihedral angles obtained from experimental and theoretical geometries.

| Crystal structure geometry |                      |                      | Computational geometry |                      |                      |
|----------------------------|----------------------|----------------------|------------------------|----------------------|----------------------|
|                            | $\varphi^1 / ^\circ$ | $\varphi^2 / ^\circ$ | model                  | $\varphi^1 / ^\circ$ | $\varphi^2 / ^\circ$ |
| $[H][N(Tf)(Ac)]$           | 84                   | 169                  | $[N(Tf)(Ac)]^-$        | 58                   | 169                  |
| $[H][N(Tf)(Ac)]$           | 84                   | 169                  | $[H][N(Tf)(Ac)]$       | 78                   | 171                  |
| $[K][N(Tf)(Ac)]$           | 180                  | 180                  | $[N(Tf)(Ac)]^-$        | 180                  | 180                  |
| $[H][N(TFA)(Ms)]$          | 181                  | 61                   | $[N(TFA)(Ms)]^-$       | 179                  | 50                   |
| $[H][N(TFA)(Ms)]$          | 181                  | 61                   | $[H][N(TFA)(Ms)]$      | 171                  | 61                   |
| $[H][N(Ms)(Ac)]$           | 58                   | 179                  | $[N(Ms)(Ac)]^-$        | 51                   | 174                  |
| $[H][N(Ms)(Ac)]$           | 58                   | 179                  | $[H][N(Ms)(Ac)]$       | 64                   | 164                  |
| $[NMe_4][CH(Tf)_2]$        | 95                   | 89                   | $[CH(Tf)_2]^-$         | 87                   | 87                   |
| $[NMe_4][CH(Tf)_2]$        | 94                   | 88                   | $[CH(Tf)_2]^-$         | 87                   | 87                   |
| $[NMe_4][CH(Tf)_2]$        | 92                   | 89                   | $[CH(Tf)_2]^-$         | 87                   | 87                   |

Comparing all structures, a root-mean-square deviation (RMSD) of  $8^\circ$  is found. If only structures with matching model geometries are compared (i.e. not comparing crystal structures of the acid with computational geometries of anions and vice versa), then a root-mean-square deviation of  $6^\circ$  is found. The root-mean-square deviation decreases further to  $4^\circ$  if the crystal structures of the free acids are omitted.

### 3. Rheology

Experimental viscosities of the two ionic liquids [C<sub>4</sub>C<sub>1</sub>Im][N(Tf)(Ac)] and [C<sub>4</sub>C<sub>1</sub>Im][N(Ms)(TFA)], given in Table 3, were fitted with to the commonly used Vogel-Fulcher-Tammann (VFT) equation (1).<sup>1-5</sup>

$$\eta = \eta_0 \exp\left(\frac{B}{T - T_0}\right) \quad (1)$$

With the fit parameters reported in Table 4, a RMSD of 0.090 mPa s between experimental viscosities and viscosities predicted by the VFT equation is obtained.

Table 3: Experimental viscosities of the ionic liquids in this work.

| T / °C | Viscosity / mPa s                             |                                                |
|--------|-----------------------------------------------|------------------------------------------------|
|        | [C <sub>4</sub> C <sub>1</sub> Im][N(Tf)(Ac)] | [C <sub>4</sub> C <sub>1</sub> Im][N(Ms)(TFA)] |
| 25     | 149.39                                        | 292.47                                         |
| 30     | 111.98                                        | 204.89                                         |
| 35     | 85.36                                         | 147.98                                         |
| 40     | 67.09                                         | 110.38                                         |
| 45     | 53.29                                         | 84.02                                          |
| 50     | 43.10                                         | 65.45                                          |
| 55     | 35.45                                         | 52.04                                          |
| 60     | 29.50                                         | 42.06                                          |
| 65     | 24.84                                         | 34.40                                          |
| 70     | 21.13                                         | 28.61                                          |
| 75     | 18.20                                         | 24.16                                          |
| 80     | 15.83                                         | 20.62                                          |
| 85     | 13.84                                         | 17.79                                          |
| 90     | 12.23                                         | 15.44                                          |
| 95     | 10.87                                         | 13.57                                          |
| 100    | 9.74                                          | 11.98                                          |
| 105    | 8.73                                          | 10.65                                          |

Table 4: Fit parameters of the viscosity data to the VFT equation (1)

|                                                | $\eta_0$ / mPa s | $\Delta\eta_0$ / mPa s | B / K  | $\Delta B$ / K | $T_0$ / K | $\Delta T_0$ | R <sup>2</sup> |
|------------------------------------------------|------------------|------------------------|--------|----------------|-----------|--------------|----------------|
| [C <sub>4</sub> C <sub>1</sub> Im][N(Tf)(Ac)]  | 0.15516          | 0.00567                | 778.09 | 9.55           | 184.895   | 0.795        | 0.99999        |
| [C <sub>4</sub> C <sub>1</sub> Im][N(Ms)(TFA)] | 0.17016          | 0.00336                | 740.91 | 4.50           | 198.693   | 0.344        | 1.00000        |

## 4. Benchmark

### 4.1 Energy

Benchmark of different levels of theory for the energies of the five stationary points of the  $[N(Tf)_2]^-$  anion, Table 5.

Table 5: Benchmark of different levels of theory for the energies of the five stationary points of the  $[N(Tf)_2]^-$  anion.

|                           | Stationary Points |                    | Barriers              |                    | RMSD<br>Barriers /<br>kJ/mol | RMSD<br>cis-trans /<br>kJ/mol |
|---------------------------|-------------------|--------------------|-----------------------|--------------------|------------------------------|-------------------------------|
|                           | Name              | Energy /<br>kJ/mol | Name                  | Energy /<br>kJ/mol |                              |                               |
| MP2/6-311+G(d,p)          | cis               | 3.78               | cis to trans          | 5.04               | 0.89                         | 0.24                          |
|                           | trans             | 0.00               | trans to cis          | 8.82               |                              |                               |
|                           | TS1               | 8.82               | cis to trans (higher) | 21.53              |                              |                               |
|                           | TS2               | 11.42              | trans to cis (higher) | 25.31              |                              |                               |
|                           | TS3               | 25.31              | cis to cis            | 7.64               |                              |                               |
| MP2/cc-pVDZ               | cis               | 3.54               | cis to trans          | 4.12               | 3.71                         | 0.01                          |
|                           | trans             | 0.00               | trans to cis          | 7.67               |                              |                               |
|                           | TS1               | 7.67               | cis to trans (higher) | 26.99              |                              |                               |
|                           | TS2               | 12.47              | trans to cis (higher) | 30.53              |                              |                               |
|                           | TS3               | 30.53              | cis to cis            | 8.93               |                              |                               |
| MP2/aug-cc-pVDZ           | cis               | 3.89               | cis to trans          | 4.52               | 2.15                         | 0.35                          |
|                           | trans             | 0.00               | trans to cis          | 8.41               |                              |                               |
|                           | TS1               | 8.41               | cis to trans (higher) | 24.31              |                              |                               |
|                           | TS2               | 10.97              | trans to cis (higher) | 28.20              |                              |                               |
|                           | TS3               | 28.20              | cis to cis            | 7.09               |                              |                               |
| MP2/cc-pVTZ               | cis               | 3.65               | cis to trans          | 3.78               | 0.31                         | 0.11                          |
|                           | trans             | 0.00               | trans to cis          | 7.43               |                              |                               |
|                           | TS1               | 7.43               | cis to trans (higher) | 21.58              |                              |                               |
|                           | TS2               | 10.82              | trans to cis (higher) | 25.23              |                              |                               |
|                           | TS3               | 25.23              | cis to cis            | 7.17               |                              |                               |
| MP2=full/cc-pVTZ          | cis               | 3.54               | cis to trans          | 3.83               | 0.00                         | 0.00                          |
|                           | trans             | 0.00               | trans to cis          | 7.37               |                              |                               |
|                           | TS1               | 7.37               | cis to trans (higher) | 21.22              |                              |                               |
|                           | TS2               | 11.03              | trans to cis (higher) | 24.75              |                              |                               |
|                           | TS3               | 24.75              | cis to cis            | 7.49               |                              |                               |
| M052X/6-311+G(d,p)        | cis               | 2.28               | cis to trans          | 4.70               | 1.58                         | 1.25                          |
|                           | trans             | 0.00               | trans to cis          | 6.98               |                              |                               |
|                           | TS1               | 6.98               | cis to trans (higher) | 19.59              |                              |                               |
|                           | TS2               | 10.58              | trans to cis (higher) | 21.87              |                              |                               |
|                           | TS3               | 21.87              | cis to cis            | 8.30               |                              |                               |
| M06/6-311+G(d,p)          | cis               | 2.49               | cis to trans          | 4.78               | 1.80                         | 1.04                          |
|                           | trans             | 0.00               | trans to cis          | 7.27               |                              |                               |
|                           | TS1               | 7.27               | cis to trans (higher) | 19.24              |                              |                               |
|                           | TS2               | 11.53              | trans to cis (higher) | 21.74              |                              |                               |
|                           | TS3               | 21.74              | cis to cis            | 9.03               |                              |                               |
| RB3LYP-GD3BJ/6-311+G(d,p) | cis               | 3.26               | cis to trans          | 3.60               | 1.97                         | 0.28                          |
|                           | trans             | 0.00               | trans to cis          | 6.85               |                              |                               |
|                           | TS1               | 6.85               | cis to trans (higher) | 18.33              |                              |                               |

|                                            |       |       |                       |       |      |      |
|--------------------------------------------|-------|-------|-----------------------|-------|------|------|
|                                            | TS2   | 9.92  | trans to cis (higher) | 21.58 |      |      |
|                                            | TS3   | 21.58 | cis to cis            | 6.67  |      |      |
| ωB97XD/6-311+G(d,p)                        | cis   | 2.68  | cis to trans          | 3.73  | 1.98 | 0.86 |
|                                            | trans | 0.00  | trans to cis          | 6.41  |      |      |
|                                            | TS1   | 6.41  | cis to trans (higher) | 18.64 |      |      |
|                                            | TS2   | 9.71  | trans to cis (higher) | 21.32 |      |      |
|                                            | TS3   | 21.32 | cis to cis            | 7.04  |      |      |
| B2PLYPD3/6-311+G(d,p)                      | cis   | 3.39  | cis to trans          | 4.04  | 0.94 | 0.15 |
|                                            | trans | 0.00  | trans to cis          | 7.43  |      |      |
|                                            | TS1   | 7.43  | cis to trans (higher) | 19.88 |      |      |
|                                            | TS2   | 10.29 | trans to cis (higher) | 23.26 |      |      |
|                                            | TS3   | 23.26 | cis to cis            | 6.91  |      |      |
| B2PLYP/6-311+G(d,p)                        | cis   | 3.57  | cis to trans          | 3.02  | 1.03 | 0.03 |
|                                            | trans | 0.00  | trans to cis          | 6.59  |      |      |
|                                            | TS1   | 6.59  | cis to trans (higher) | 20.09 |      |      |
|                                            | TS2   | 9.82  | trans to cis (higher) | 23.66 |      |      |
|                                            | TS3   | 23.66 | cis to cis            | 6.25  |      |      |
| B3LYP/6-311+G(d,p)                         | cis   | 3.15  | cis to trans          | 2.10  | 2.02 | 0.39 |
|                                            | trans | 0.00  | trans to cis          | 5.25  |      |      |
|                                            | TS1   | 5.25  | cis to trans (higher) | 19.14 |      |      |
|                                            | TS2   | 9.06  | trans to cis (higher) | 22.29 |      |      |
|                                            | TS3   | 22.29 | cis to cis            | 5.91  |      |      |
| MP2/cc-pvtz//<br>RB3LYP-GD3BJ/6-311+G(d,p) | cis   | 3.63  | cis to trans          | 3.70  | 0.19 | 0.09 |
|                                            | trans | 0.00  | trans to cis          | 7.33  |      |      |
|                                            | TS1   | 7.33  | cis to trans (higher) | 21.21 |      |      |
|                                            | TS2   | 10.74 | trans to cis (higher) | 24.84 |      |      |
|                                            | TS3   | 24.84 | cis to cis            | 7.11  |      |      |
| MP2/cc-pvtz//<br>M06 (reduced conv. crit)  | cis   | 3.49  | cis to trans          | 3.63  | 0.16 | 0.05 |
|                                            | trans | 0.00  | trans to cis          | 7.12  |      |      |
|                                            | TS1   | 7.12  | cis to trans (higher) | 21.20 |      |      |
|                                            | TS2   | 10.82 | trans to cis (higher) | 24.69 |      |      |
|                                            | TS3   | 24.69 | cis to cis            | 7.34  |      |      |
| MP2/cc-pvtz//<br>M06/6-311+G(d,p)          | cis   | 3.49  | cis to trans          | 3.63  | 0.16 | 0.05 |
|                                            | trans | 0.00  | trans to cis          | 7.12  |      |      |
|                                            | TS1   | 7.12  | cis to trans (higher) | 21.20 |      |      |
|                                            | TS2   | 10.82 | trans to cis (higher) | 24.69 |      |      |
|                                            | TS3   | 24.69 | cis to cis            | 7.34  |      |      |
| B3LYP-GD3BJ/6-311+G(d,p)<br>with SMD       | cis   | 3.52  | cis to trans          | 4.46  | 1.21 | 0.02 |
|                                            | trans | 0.00  | trans to cis          | 7.98  |      |      |
|                                            | TS1   | 7.98  | cis to trans (higher) | 20.98 |      |      |
|                                            | TS2   | 8.48  | trans to cis (higher) | 24.50 |      |      |
|                                            | TS3   | 24.50 | cis to cis            | 4.96  |      |      |
| M06-GD3/6-311+G(d,p)                       | cis   | 2.21  | cis to trans          | 5.18  | 1.93 | 1.33 |
|                                            | trans | 0.00  | trans to cis          | 7.39  |      |      |
|                                            | TS1   | 7.39  | cis to trans (higher) | 19.26 |      |      |
|                                            | TS2   | 11.15 | trans to cis (higher) | 21.47 |      |      |
|                                            | TS3   | 21.47 | cis to cis            | 8.94  |      |      |
| HF/6-311+G(d,p)                            | cis   | 1.64  | cis to trans          | 2.77  | 1.84 | 1.90 |



|                                                |       |       |                       |       |      |      |
|------------------------------------------------|-------|-------|-----------------------|-------|------|------|
|                                                | trans | 0.00  | trans to cis          | 4.41  |      |      |
|                                                | TS1   | 4.41  | cis to trans (higher) | 23.63 |      |      |
|                                                | TS2   | 10.13 | trans to cis (higher) | 25.27 |      |      |
|                                                | TS3   | 25.27 | cis to cis            | 8.49  |      |      |
| M06/aug-cc-pVTZ                                | cis   | 2.42  | cis to trans          | 4.27  | 2.32 | 1.12 |
|                                                | trans | 0.00  | trans to cis          | 6.69  |      |      |
|                                                | TS1   | 6.69  | cis to trans (higher) | 18.21 |      |      |
|                                                | TS2   | 10.31 | trans to cis (higher) | 20.63 |      |      |
|                                                | TS3   | 20.63 | cis to cis            | 7.89  |      |      |
| M06/aug-cc-pVDZ                                | cis   | 3.35  | cis to trans          | 4.55  | 0.70 | 0.18 |
|                                                | trans | 0.00  | trans to cis          | 7.90  |      |      |
|                                                | TS1   | 7.90  | cis to trans (higher) | 21.48 |      |      |
|                                                | TS2   | 12.11 | trans to cis (higher) | 24.83 |      |      |
|                                                | TS3   | 24.83 | cis to cis            | 8.76  |      |      |
| MP2/cc-pvtz//<br>M06/aug-cc-pVTZ               | cis   | 3.35  | cis to trans          | 3.75  | 0.19 | 0.18 |
|                                                | trans | 0.00  | trans to cis          | 7.10  |      |      |
|                                                | TS1   | 7.10  | cis to trans (higher) | 21.30 |      |      |
|                                                | TS2   | 10.55 | trans to cis (higher) | 24.65 |      |      |
|                                                | TS3   | 24.65 | cis to cis            | 7.19  |      |      |
| B3LYP-GD3BJ/6-311G(d,p)                        | cis   | 3.26  | cis to trans          | 5.04  | 1.08 | 0.28 |
|                                                | trans | 0.00  | trans to cis          | 8.29  |      |      |
|                                                | TS1   | 8.29  | cis to trans (higher) | 20.03 |      |      |
|                                                | TS2   | 10.72 | trans to cis (higher) | 23.28 |      |      |
|                                                | TS3   | 23.28 | cis to cis            | 7.47  |      |      |
| B3LYP-GD3BJ/6-31+G(d,p)                        | cis   | 3.51  | cis to trans          | 3.54  | 1.30 | 0.02 |
|                                                | trans | 0.00  | trans to cis          | 7.05  |      |      |
|                                                | TS1   | 7.05  | cis to trans (higher) | 19.39 |      |      |
|                                                | TS2   | 9.77  | trans to cis (higher) | 22.90 |      |      |
|                                                | TS3   | 22.90 | cis to cis            | 6.26  |      |      |
| MP2=full/cc-pVTZ//<br>B3LYP-GD3BJ/6-311+G(d,p) | cis   | 3.47  | cis to trans          | 3.66  | 0.28 | 0.07 |
|                                                | trans | 0.00  | trans to cis          | 7.13  |      |      |
|                                                | TS1   | 7.13  | cis to trans (higher) | 20.88 |      |      |
|                                                | TS2   | 10.81 | trans to cis (higher) | 24.35 |      |      |
|                                                | TS3   | 24.35 | cis to cis            | 7.34  |      |      |
| CCSD/cc-pVDZ                                   | cis   | 3.48  |                       |       |      | 0.06 |
|                                                | trans | 0.00  |                       |       |      |      |
| CCSD/cc-pvtz//<br>CCSD/cc-pVDZ                 | cis   | 3.44  |                       |       |      | 0.09 |
|                                                | trans | 0.00  |                       |       |      |      |
| CCSD(T)/cc-pVTZ//<br>CCSD/cc-pVDZ              | cis   | 3.44  |                       |       |      | 0.09 |
|                                                | trans | 0.00  |                       |       |      |      |
| CCSD(T)/cc-pVDZ//<br>CCSD/cc-pVDZ              | cis   | 3.48  |                       |       |      | 0.06 |
|                                                | trans | 0.00  |                       |       |      |      |

## 4.2 Geometry

Benchmark of different levels of theory for the geometries of the five stationary points of the  $[\text{N}(\text{Tf})_2]^-$  anion, Table 6.

Table 6: Benchmark of different levels of theory for the geometries (backbone dihedral angles) of the five stationary points of the  $[\text{N}(\text{Tf})_2]^-$  anion.

|                    | Name  | $\varphi^1 / ^\circ$ | $\Phi^2 / ^\circ$ | RMSD / $^\circ$ |
|--------------------|-------|----------------------|-------------------|-----------------|
| MP2/6-311+G(d,p)   | cis   | 83.3                 | -126.1            | 2.99            |
|                    | trans | 93.3                 | 93.3              |                 |
|                    | TS1   | 92.7                 | 159.4             |                 |
|                    | TS2   | 112.2                | -112.3            |                 |
|                    | TS3   | 99                   | -4.4              |                 |
| MP2/cc-pVDZ        | cis   | 85.4                 | -127.2            | 3.01            |
|                    | trans | 91.2                 | 91.2              |                 |
|                    | TS1   | 85.8                 | 150.5             |                 |
|                    | TS2   | 113.3                | -113.3            |                 |
|                    | TS3   | 97.1                 | -3.9              |                 |
| MP2/aug-cc-pVDZ    | cis   | 82.8                 | -123.5            | 4.02            |
|                    | trans | 91.2                 | 91.2              |                 |
|                    | TS1   | 82.8                 | 153.3             |                 |
|                    | TS2   | 107.4                | -107.4            |                 |
|                    | TS3   | 99.1                 | -6.1              |                 |
| MP2/cc-pVTZ        | cis   | 85.9                 | -128.4            | 0.44            |
|                    | trans | 92.5                 | 92.5              |                 |
|                    | TS1   | 89.5                 | 153.7             |                 |
|                    | TS2   | 112.6                | -112.6            |                 |
|                    | TS3   | 102.4                | -7.9              |                 |
| MP2=full/cc-pVTZ   | cis   | 85.9                 | -128.3            | 0.00            |
|                    | trans | 92.6                 | 92.6              |                 |
|                    | TS1   | 89.1                 | 154.2             |                 |
|                    | TS2   | 112.9                | -112.9            |                 |
|                    | TS3   | 103.3                | -8.6              |                 |
| M052X/6-311+G(d,p) | cis   | 84.1                 | -127.6            | 2.21            |
|                    | trans | 93                   | 93                |                 |
|                    | TS1   | 93.2                 | 154.2             |                 |
|                    | TS2   | 114.2                | -114.2            |                 |
|                    | TS3   | 100.1                | -4.8              |                 |
| M06/6-311+G(d,p)   | cis   | 83.4                 | -128.3            | 1.68            |

|                                   |       |       |        |      |
|-----------------------------------|-------|-------|--------|------|
|                                   | trans | 93.3  | 93.3   |      |
|                                   | TS1   | 92.5  | 155.3  |      |
|                                   | TS2   | 114.8 | -114.8 |      |
|                                   | TS3   | 102.6 | -9.4   |      |
| <hr/>                             |       |       |        |      |
| B3LYP-GD3BJ/6-311+G(d,p)          | cis   | 84    | -128.7 | 2.59 |
|                                   | trans | 92.4  | 92.4   |      |
|                                   | TS1   | 88.8  | 156    |      |
|                                   | TS2   | 109   | -109   |      |
|                                   | TS3   | 99    | -5.3   |      |
| <hr/>                             |       |       |        |      |
| $\omega$ B97XD/6-311+G(d,p)       | cis   | 87.2  | -134.5 | 2.70 |
|                                   | trans | 94.1  | 94.1   |      |
|                                   | TS1   | 92.3  | 155.8  |      |
|                                   | TS2   | 111.5 | -111.5 |      |
|                                   | TS3   | 101.4 | -5.8   |      |
| <hr/>                             |       |       |        |      |
| B2PLYPD3/6-311+G(d,p)             | cis   | 83.6  | -127.1 | 2.65 |
|                                   | trans | 92.6  | 92.6   |      |
|                                   | TS1   | 90.5  | 157.2  |      |
|                                   | TS2   | 110.3 | -110.3 |      |
|                                   | TS3   | 98.5  | -4.6   |      |
| <hr/>                             |       |       |        |      |
| B2PLYP/6-311+G(d,p)               | cis   | 85.7  | -130.8 | 2.68 |
|                                   | trans | 93.4  | 93.4   |      |
|                                   | TS1   | 92.1  | 155.9  |      |
|                                   | TS2   | 111.4 | -111.4 |      |
|                                   | TS3   | 98.4  | -3.7   |      |
| <hr/>                             |       |       |        |      |
| B3LYP/6-311+G(d,p)                | cis   | 93.7  | -155.1 | 9.16 |
|                                   | trans | 94.1  | 94.1   |      |
|                                   | TS1   | 92.7  | 152.9  |      |
|                                   | TS2   | 111.5 | -111.5 |      |
|                                   | TS3   | 99.5  | -3.9   |      |
| <hr/>                             |       |       |        |      |
| B3LYP-GD3BJ/6-311+G(d,p) with SMD | cis   | 83.4  | -121   | 6.15 |
|                                   | trans | 91.5  | 91.5   |      |
|                                   | TS1   | 86    | 155.6  |      |
|                                   | TS2   | 100.4 | -102.7 |      |
|                                   | TS3   | 97.8  | -4.8   |      |
| <hr/>                             |       |       |        |      |
| M06-GD3/6-311+G(d,p)              | cis   | 83.4  | -128.2 | 1.80 |
|                                   | trans | 94.4  | 94.4   |      |

|                         |       |       |        |       |
|-------------------------|-------|-------|--------|-------|
|                         | TS1   | 92.7  | 155.6  |       |
|                         | TS2   | 114.2 | -114.2 |       |
|                         | TS3   | 102.7 | -9.6   |       |
| <hr/>                   |       |       |        |       |
| HF/6-311+G(d,p)         | cis   | 100.6 | -169   | 14.86 |
|                         | trans | 95.2  | 95.2   |       |
|                         | TS1   | 98.3  | 144.3  |       |
|                         | TS2   | 120.4 | -120.4 |       |
|                         | TS3   | 102.7 | -3.4   |       |
| <hr/>                   |       |       |        |       |
| M06/aug-cc-pVTZ         | cis   | 84.3  | -128.6 | 1.82  |
|                         | trans | 94.3  | 94.3   |       |
|                         | TS1   | 89.5  | 153.6  |       |
|                         | TS2   | 114.2 | -114.5 |       |
|                         | TS3   | 105.5 | -12.5  |       |
| <hr/>                   |       |       |        |       |
| M06/aug-cc-pVDZ         | cis   | 82.3  | -126.8 | 2.11  |
|                         | trans | 93.7  | 93.7   |       |
|                         | TS1   | 84.2  | 154.1  |       |
|                         | TS2   | 112.7 | -112.8 |       |
|                         | TS3   | 102   | -9.6   |       |
| <hr/>                   |       |       |        |       |
| B3LYP-GD3BJ/6-311G(d,p) | cis   | 80.3  | -122.1 | 4.91  |
|                         | trans | 90.5  | 90.5   |       |
|                         | TS1   | 85.3  | 155.1  |       |
|                         | TS2   | 106.1 | -106.1 |       |
|                         | TS3   | 97.3  | -4.3   |       |
| <hr/>                   |       |       |        |       |
| B3LYP-GD3BJ/6-31+G(d,p) | cis   | 83    | -127   | 3.42  |
|                         | trans | 91.2  | 91.2   |       |
|                         | TS1   | 87.8  | 150.7  |       |
|                         | TS2   | 107.2 | -107.2 |       |
|                         | TS3   | 99.1  | -6.1   |       |
| <hr/>                   |       |       |        |       |
| CCSD/cc-pVDZ            | cis   | 85.4  | -129.4 | 1.22  |
|                         | trans | 91.1  | 91.1   |       |
| <hr/>                   |       |       |        |       |

## 5. Additional molecular orbitals

For  $O(\text{Tf})_2$  and  $[\text{CH}(\text{Tf})_2]^-$ , HOMO-8 and HOMO-18 directly correspond to the respective molecular orbitals in  $[\text{N}(\text{Tf})_2]^-$ , Figure 2.

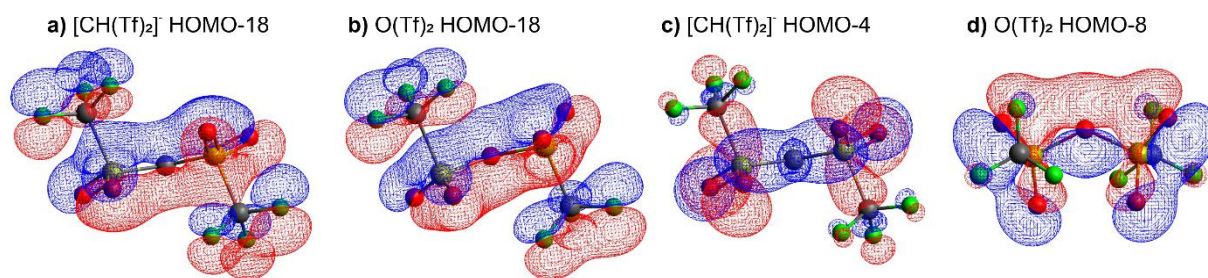

Figure 2: Molecular orbitals showing the delocalisation in  $[\text{CH}(\text{Tf})_2]^-$  and  $O(\text{Tf})_2$ .

## 6. Key structures

The  $[\text{N}(\text{Tf})(\text{TFA})]^-$  anion shows a flat structure as global minimum, from which other minima are obtained by tilting one of the end groups out of the paper plane, Figure 3.

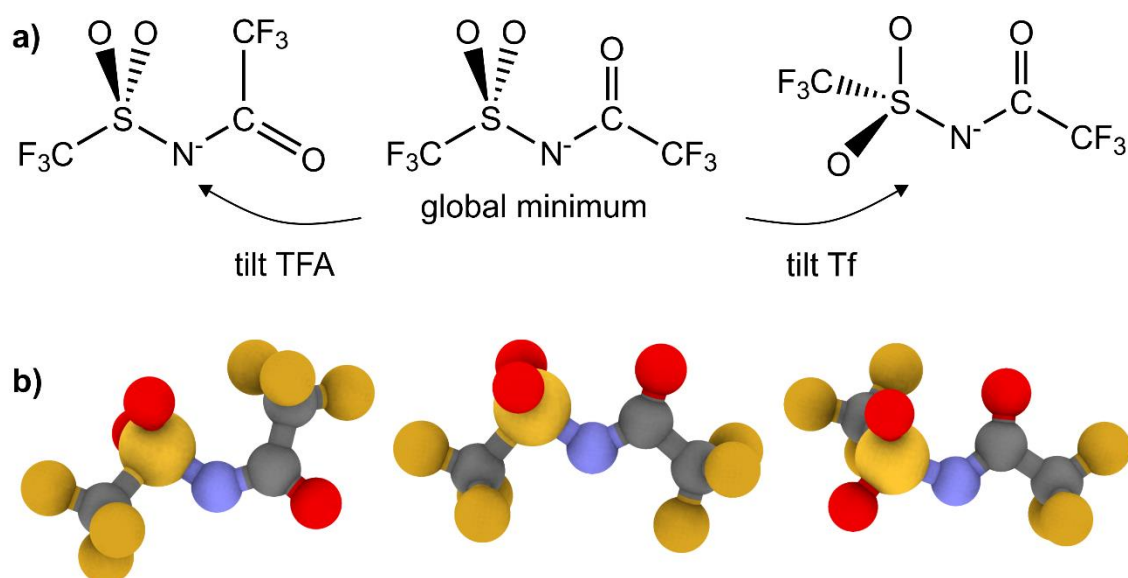

Figure 3: minimum structures of  $[\text{N}(\text{Tf})(\text{TFA})]^-$ : **a)** schematic representation of the tilted groups, **b)** optimised minimum geometries.

## 7. NBO charges

The delocalisation of negative charge over the fluorinated end groups in  $[\text{N}(\text{Tf})_2]^-$  is visible in the natural bond orbital analysis (NBO) charges of  $[\text{N}(\text{Tf})_2]^-$  in comparison with those of  $[\text{N}(\text{Ms})_2]^-$ , Table 7.

Table 7: Sum of the NBO charges for the central group (nitrogen atom), the sulfur atoms, the oxygen atoms and the end groups ( $\text{CH}_3$  for  $[\text{N}(\text{Ms})_2]^-$  and  $\text{CF}_3$  for  $[\text{N}(\text{Tf})_2]^-$ ).

|               | $[\text{N}(\text{Ms})_2]^-$ | $[\text{N}(\text{Tf})_2]^-$ |
|---------------|-----------------------------|-----------------------------|
| Central group | -1.20                       | -1.19                       |
| Sulfur        | 4.36                        | 4.26                        |
| Oxygen        | -3.90                       | -3.64                       |
| End groups    | -0.26                       | -0.42                       |

## 8. Stationary points

Below are given the stationary points for charged (Table 8) and neutral (Table 9) analogues.

Table 8: Equilibrium dihedral angles of the backbone, type of the stationary point (GS = ground state local minimum, TS = transition state), and energy referenced to the global minimum for the negatively charged structures. Xyz files of all structures can be found in the folder 'anion\_structures'.

| system                                 | type | $\varphi^1 / ^\circ$ | $\varphi^2 / ^\circ$ | kJ/mol | system                                | type | $\varphi^1 / ^\circ$ | $\varphi^2 / ^\circ$ | kJ/mol |
|----------------------------------------|------|----------------------|----------------------|--------|---------------------------------------|------|----------------------|----------------------|--------|
| $[\text{CH}(\text{Ac})_2]^-$           | GS   | 0                    | 180                  | 0.0    | $[\text{N}(\text{Sf})_2]^-$           | GS   | 63                   | 63                   | 0.0    |
| $[\text{CH}(\text{Ac})_2]^-$           | GS   | 0                    | 0                    | 20.9   | $[\text{N}(\text{Sf})_2]^-$           | GS   | 50                   | 215                  | 18.0   |
| $[\text{CH}(\text{Ac})_2]^-$           | GS   | 180                  | 180                  | 27.7   | $[\text{N}(\text{Sf})_2]^-$           | TS   | 113                  | 344                  | 18.3   |
| $[\text{CH}(\text{Ac})_2]^-$           | TS   | 89                   | 184                  | 90.3   | $[\text{N}(\text{Sf})_2]^-$           | TS   | 62                   | 298                  | 27.2   |
| $[\text{CH}(\text{Ac})_2]^-$           | TS   | 1                    | 90                   | 97.8   | $[\text{N}(\text{Sf})_2]^-$           | TS   | 52                   | 151                  | 29.9   |
| $[\text{CH}(\text{Fs})_2]^-$           | GS   | 75                   | 285                  | 0.0    | $[\text{N}(\text{Tf})_2]^-$           | GS   | 92                   | 92                   | 0.0    |
| $[\text{CH}(\text{Fs})_2]^-$           | GS   | 84                   | 84                   | 0.2    | $[\text{N}(\text{Tf})_2]^-$           | GS   | 84                   | 231                  | 3.5    |
| $[\text{CH}(\text{Fs})_2]^-$           | TS   | 79                   | 199                  | 27.3   | $[\text{N}(\text{Tf})_2]^-$           | TS   | 89                   | 156                  | 7.1    |
| $[\text{CH}(\text{Fs})_2]^-$           | TS   | 16                   | 64                   | 32.9   | $[\text{N}(\text{Tf})_2]^-$           | TS   | 109                  | 251                  | 10.8   |
| $[\text{CH}(\text{Ms})_2]^-$           | GS   | 65                   | 76                   | 0.0    | $[\text{N}(\text{Tf})_2]^-$           | TS   | 99                   | 355                  | 24.3   |
| $[\text{CH}(\text{Ms})_2]^-$           | GS   | 132                  | 293                  | 28.8   | $[\text{N}(\text{TFA})_2]^-$          | TS   | 180                  | 180                  | 0.0    |
| $[\text{CH}(\text{Ms})_2]^-$           | TS   | 73                   | 287                  | 29.3   | $[\text{N}(\text{TFA})_2]^-$          | GS   | 163                  | 163                  | 0.4    |
| $[\text{CH}(\text{Ms})_2]^-$           | TS   | 0                    | 77                   | 38.7   | $[\text{N}(\text{TFA})_2]^-$          | GS   | 44                   | 195                  | 4.3    |
| $[\text{CH}(\text{Ms})_2]^-$           | TS   | 61                   | 209                  | 43.5   | $[\text{N}(\text{TFA})_2]^-$          | GS   | 43                   | 43                   | 13.5   |
| $[\text{CH}(\text{Tf})_2]^-$           | GS   | 87                   | 87                   | 0.0    | $[\text{N}(\text{TFA})_2]^-$          | TS   | 96                   | 181                  | 13.7   |
| $[\text{CH}(\text{Tf})_2]^-$           | GS   | 101                  | 273                  | 7.5    | $[\text{N}(\text{TFA})_2]^-$          | TS   | 4                    | 93                   | 20.1   |
| $[\text{CH}(\text{Tf})_2]^-$           | TS   | 96                   | 264                  | 7.6    | $[\text{N}(\text{TFA})(\text{Ac})]^-$ | GS   | 191                  | 34                   | 0.0    |
| $[\text{CH}(\text{Tf})_2]^-$           | TS   | 84                   | 189                  | 41.0   | $[\text{N}(\text{TFA})(\text{Ac})]^-$ | TS   | 180                  | 0                    | 1.8    |
| $[\text{CH}(\text{Tf})_2]^-$           | TS   | 91                   | 359                  | 53.0   | $[\text{N}(\text{TFA})(\text{Ac})]^-$ | GS   | 167                  | 146                  | 13.0   |
| $[\text{CH}(\text{TFA})_2]^-$          | GS   | 180                  | 180                  | 0.0    | $[\text{N}(\text{TFA})(\text{Ac})]^-$ | TS   | 180                  | 180                  | 14.1   |
| $[\text{CH}(\text{TFA})_2]^-$          | GS   | 180                  | 0                    | 2.8    | $[\text{N}(\text{TFA})(\text{Ac})]^-$ | GS   | 40                   | 205                  | 16.5   |
| $[\text{CH}(\text{TFA})_2]^-$          | GS   | 22                   | 22                   | 30.9   | $[\text{N}(\text{TFA})(\text{Ac})]^-$ | GS   | 32                   | 46                   | 22.6   |
| $[\text{CH}(\text{TFA})_2]^-$          | TS   | 92                   | 181                  | 74.3   | $[\text{N}(\text{TFA})(\text{Ac})]^-$ | TS   | 5                    | 88                   | 27.3   |
| $[\text{CH}(\text{TFA})_2]^-$          | TS   | 95                   | 359                  | 83.5   | $[\text{N}(\text{TFA})(\text{Ac})]^-$ | TS   | 0                    | 180                  | 29.3   |
| $[\text{CH}(\text{Tf})(\text{TFA})]^-$ | GS   | 78                   | 179                  | 0.0    | $[\text{N}(\text{TFA})(\text{Ac})]^-$ | TS   | 98                   | 180                  | 31.2   |
| $[\text{CH}(\text{Tf})(\text{TFA})]^-$ | GS   | 92                   | 2                    | 11.8   | $[\text{N}(\text{TFA})(\text{Ac})]^-$ | TS   | 88                   | 6                    | 33.0   |

|                                    |    |     |     |      |                           |    |     |     |      |
|------------------------------------|----|-----|-----|------|---------------------------|----|-----|-----|------|
| [CH(Tf)(TFA)] <sup>-</sup>         | TS | 180 | 180 | 28.4 | [N(Tf)(Ac)] <sup>-</sup>  | GS | 89  | 5   | 0.0  |
| [CH(Tf)(TFA)] <sup>-</sup>         | TS | 0   | 180 | 34.3 | [N(Tf)(Ac)] <sup>-</sup>  | GS | 187 | 0   | 0.3  |
| [CH(Tf)(TFA)] <sup>-</sup>         | TS | 180 | 0   | 41.7 | [N(Tf)(Ac)] <sup>-</sup>  | TS | 110 | 13  | 1.5  |
| [CH(Tf)(TFA)] <sup>-</sup>         | TS | 80  | 104 | 90.9 | [N(Tf)(Ac)] <sup>-</sup>  | GS | 180 | 180 | 1.7  |
| [N(Ac) <sub>2</sub> ] <sup>-</sup> | GS | 29  | 193 | 0.0  | [N(Tf)(Ac)] <sup>-</sup>  | GS | 58  | 170 | 4.7  |
| [N(Ac) <sub>2</sub> ] <sup>-</sup> | GS | 153 | 153 | 15.5 | [N(Tf)(Ac)] <sup>-</sup>  | TS | 108 | 190 | 9.0  |
| [N(Ac) <sub>2</sub> ] <sup>-</sup> | TS | 173 | 109 | 20.0 | [N(Tf)(Ac)] <sup>-</sup>  | TS | 0   | 180 | 17.7 |
| [N(Ac) <sub>2</sub> ] <sup>-</sup> | GS | 37  | 37  | 20.2 | [N(Tf)(Ac)] <sup>-</sup>  | TS | 81  | 99  | 19.9 |
| [N(Ac) <sub>2</sub> ] <sup>-</sup> | TS | 5   | 87  | 27.5 | [N(Tf)(Ac)] <sup>-</sup>  | TS | 93  | 261 | 24.1 |
| [N(Fs) <sub>2</sub> ] <sup>-</sup> | GS | 76  | 76  | 0.0  | [N(TFA)(Ms)] <sup>-</sup> | GS | 179 | 50  | 0.0  |
| [N(Fs) <sub>2</sub> ] <sup>-</sup> | GS | 65  | 270 | 4.3  | [N(TFA)(Ms)] <sup>-</sup> | GS | 180 | 180 | 12.0 |
| [N(Fs) <sub>2</sub> ] <sup>-</sup> | TS | 77  | 283 | 4.6  | [N(TFA)(Ms)] <sup>-</sup> | TS | 185 | 113 | 22.5 |
| [N(Fs) <sub>2</sub> ] <sup>-</sup> | TS | 72  | 157 | 13.0 | [N(TFA)(Ms)] <sup>-</sup> | GS | 0   | 196 | 33.6 |
| [N(Fs) <sub>2</sub> ] <sup>-</sup> | TS | 2   | 69  | 17.2 | [N(TFA)(Ms)] <sup>-</sup> | TS | 8   | 107 | 40.7 |
| [N(Ms) <sub>2</sub> ] <sup>-</sup> | GS | 72  | 72  | 0.0  | [N(TFA)(Ms)] <sup>-</sup> | TS | 89  | 83  | 52.3 |
| [N(Ms) <sub>2</sub> ] <sup>-</sup> | GS | 70  | 200 | 22.2 | [N(TFA)(Ms)] <sup>-</sup> | TS | 87  | 267 | 56.8 |
| [N(Ms) <sub>2</sub> ] <sup>-</sup> | TS | 48  | 159 | 27.4 | [N(TFA)(Ms)] <sup>-</sup> | TS | 180 | 0   | 7.5  |
| [N(Ms) <sub>2</sub> ] <sup>-</sup> | TS | 90  | 350 | 33.7 | [N(Tf)(TFA)] <sup>-</sup> | GS | 180 | 180 | 0.0  |
| [N(Ms) <sub>2</sub> ] <sup>-</sup> | TS | 82  | 278 | 39.1 | [N(Tf)(TFA)] <sup>-</sup> | GS | 74  | 173 | 2.3  |
| [N(Ms)(Ac)] <sup>-</sup>           | GS | 51  | 174 | 0.0  | [N(Tf)(TFA)] <sup>-</sup> | TS | 108 | 186 | 6.9  |
| [N(Ms)(Ac)] <sup>-</sup>           | GS | 180 | 0   | 8.5  | [N(Tf)(TFA)] <sup>-</sup> | TS | 0   | 180 | 15.7 |
| [N(Ms)(Ac)] <sup>-</sup>           | TS | 0   | 180 | 8.6  | [N(Tf)(TFA)] <sup>-</sup> | GS | 202 | 355 | 18.9 |
| [N(Ms)(Ac)] <sup>-</sup>           | GS | 180 | 180 | 15.1 | [N(Tf)(TFA)] <sup>-</sup> | TS | 94  | 90  | 32.3 |
| [N(Ms)(Ac)] <sup>-</sup>           | TS | 116 | 182 | 27.1 | [N(Tf)(TFA)] <sup>-</sup> | TS | 265 | 75  | 39.0 |
| [N(Ms)(Ac)] <sup>-</sup>           | TS | 74  | 91  | 33.6 |                           |    |     |     |      |
| [N(Ms)(Ac)] <sup>-</sup>           | TS | 95  | 261 | 53.2 |                           |    |     |     |      |

Table 9: Equilibrium dihedral angles of the backbone, type of the stationary point (GS = local minimum, TS = transition state), and energy referenced to the global minimum for the neutral structures. Xyz files of all structures can be found in the folder 'neutral\_structures'.

| system              | type | $\varphi^1 / ^\circ$ | $\varphi^2 / ^\circ$ | kJ/mol | system              | type | $\varphi^1 / ^\circ$ | $\varphi^2 / ^\circ$ | kJ/mol |
|---------------------|------|----------------------|----------------------|--------|---------------------|------|----------------------|----------------------|--------|
| NH(Tf) <sub>2</sub> | GS   | 88                   | 88                   | 0.0    | O(Sf) <sub>2</sub>  | GS   | 66                   | 66                   | 0.0    |
| NH(Tf) <sub>2</sub> | GS   | 121                  | 271                  | 7.4    | O(Sf) <sub>2</sub>  | GS   | 58                   | 211                  | 11.8   |
| NH(Tf) <sub>2</sub> | TS   | 106                  | 254                  | 9.8    | O(Sf) <sub>2</sub>  | TS   | 114                  | 351                  | 16.9   |
| NH(Tf) <sub>2</sub> | TS   | 84                   | 193                  | 33.9   | O(Sf) <sub>2</sub>  | TS   | 65                   | 150                  | 21.9   |
| NH(Tf) <sub>2</sub> | TS   | 105                  | 348                  | 46.1   | O(Sf) <sub>2</sub>  | TS   | 89                   | 271                  | 27.4   |
| O(Fs) <sub>2</sub>  | GS   | 76                   | 76                   | 0.0    | O(Tf) <sub>2</sub>  | GS   | 94                   | 94                   | 0.0    |
| O(Fs) <sub>2</sub>  | GS   | 80                   | 202                  | 4.8    | O(Tf) <sub>2</sub>  | GS   | 98                   | 203                  | 3.5    |
| O(Fs) <sub>2</sub>  | GS   | 60                   | 271                  | 4.9    | O(Tf) <sub>2</sub>  | TS   | 94                   | 151                  | 6.8    |
| O(Fs) <sub>2</sub>  | TS   | 74                   | 219                  | 5.9    | O(Tf) <sub>2</sub>  | TS   | 120                  | 240                  | 11.7   |
| O(Fs) <sub>2</sub>  | TS   | 74                   | 286                  | 6.1    | O(Tf) <sub>2</sub>  | TS   | 101                  | 356                  | 27.6   |
| O(Fs) <sub>2</sub>  | TS   | 65                   | 159                  | 10.5   | NH(Fs) <sub>2</sub> | GS   | 81                   | 81                   | 0.0    |
| O(Fs) <sub>2</sub>  | TS   | 5                    | 62                   | 16.3   | NH(Fs) <sub>2</sub> | GS   | 71                   | 289                  | 2.3    |
| O(Fs) <sub>2</sub>  | TS   | 0                    | 180                  | 19.8   | NH(Fs) <sub>2</sub> | TS   | 76                   | 207                  | 18.6   |
| O(Ms) <sub>2</sub>  | GS   | 75                   | 75                   | 0.0    | NH(Fs) <sub>2</sub> | TS   | 15                   | 58                   | 23.9   |
| O(Ms) <sub>2</sub>  | GS   | 77                   | 194                  | 15.1   | NH(Ms) <sub>2</sub> | GS   | 68                   | 78                   | 0.0    |
| O(Ms) <sub>2</sub>  | TS   | 58                   | 166                  | 19.0   | NH(Ms) <sub>2</sub> | GS   | 147                  | 283                  | 23.3   |
| O(Ms) <sub>2</sub>  | TS   | 0                    | 180                  | 24.5   | NH(Ms) <sub>2</sub> | TS   | 92                   | 268                  | 33.7   |
| O(Ms) <sub>2</sub>  | TS   | 97                   | 263                  | 37.9   | NH(Ms) <sub>2</sub> | TS   | 15                   | 261                  | 41.0   |

## 9. Potential energy surfaces

The energies of 2D scans in this work are given in the folder 'scan\_results' as POSIX text files. In these files, the first column corresponds to the dihedral from the group which is mentioned first. E.g. in 'MP2RESULTS\_ENERGIES\_NMsTFA', the first column corresponds to the C-S-N-C dihedral angle from the methanesulfonyl group, and the second column corresponds to the C-C-N-S dihedral angle from the trifluoroacetyl group. The third column contains the respective energies, given in Hartree. All angles are given in degrees, using the 0-360° convention. Additionally, 2D plots of all scanned surfaces are shown below, Figure 4 to Figure 27. Legend: red crosses = transition states, black crosses = local minima, dashed line = 15 kJ/mol threshold, red pluses = dihedral angles from crystal structures.



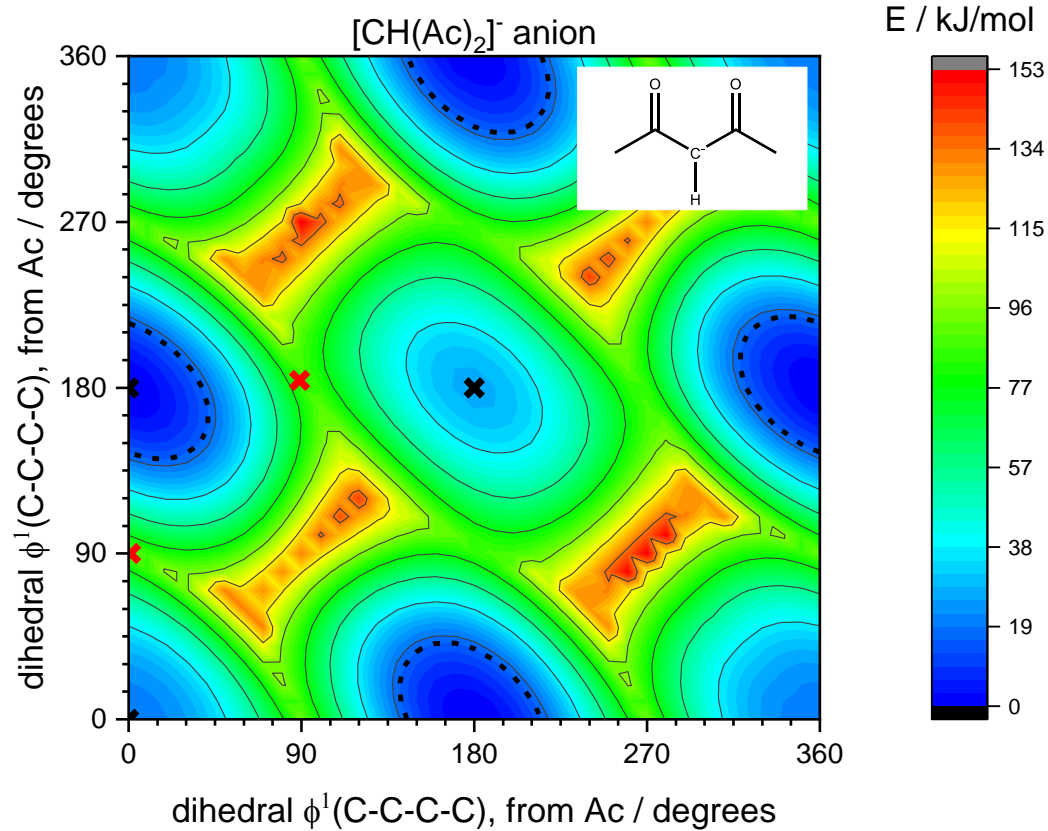

Figure 4: Potential Energy Surface of the  $[\text{CH}(\text{Ac})_2]^-$  anion.

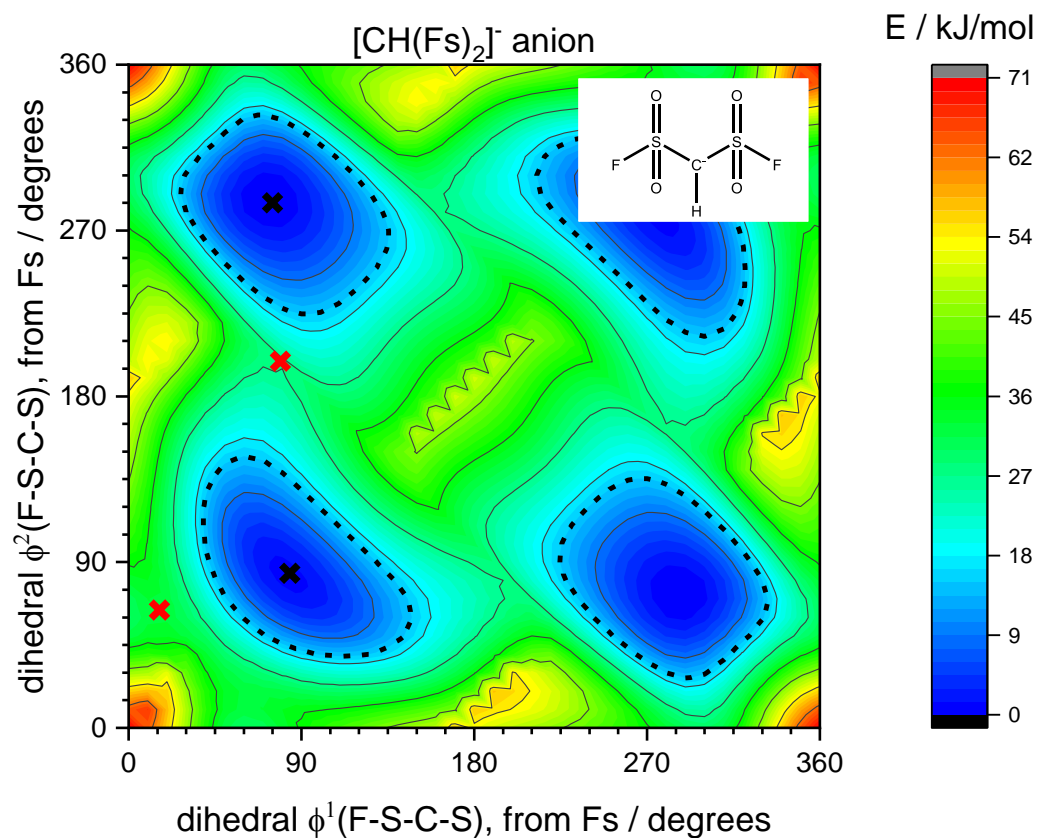

Figure 5: Potential Energy Surface of the  $[\text{CH}(\text{Fs})_2]^-$  anion.

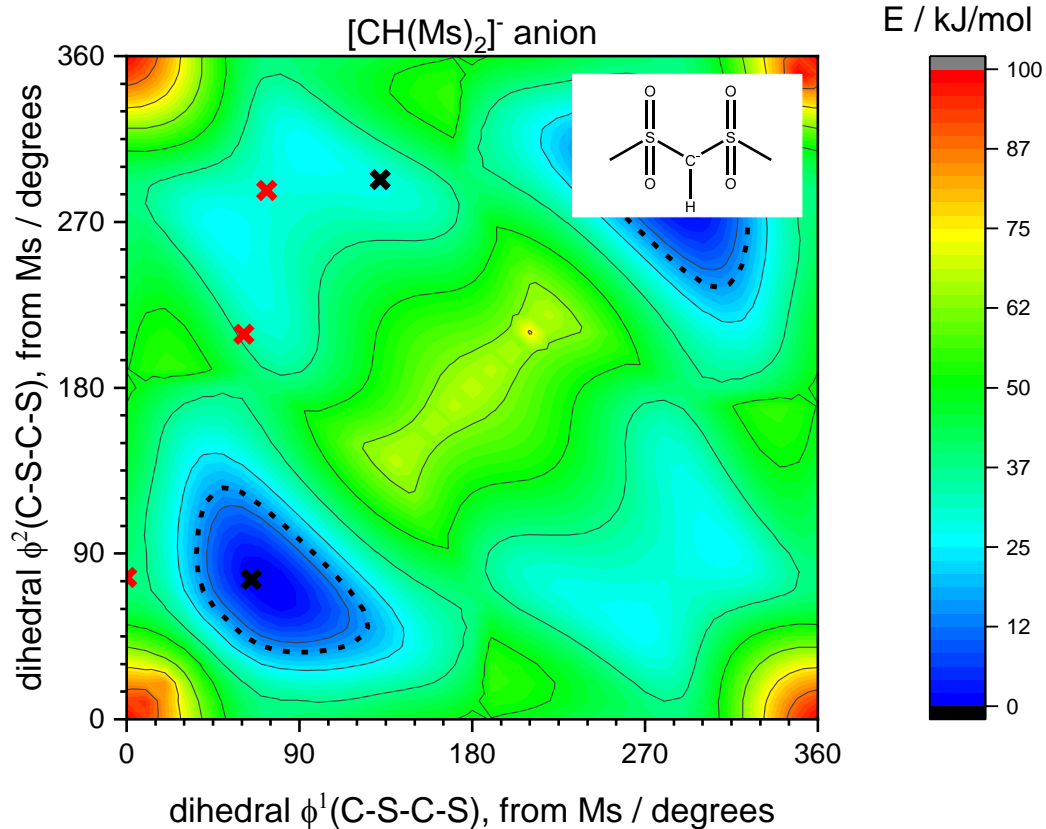

Figure 6: Potential Energy Surface of the [CH(Ms)<sub>2</sub>]<sup>-</sup> anion.

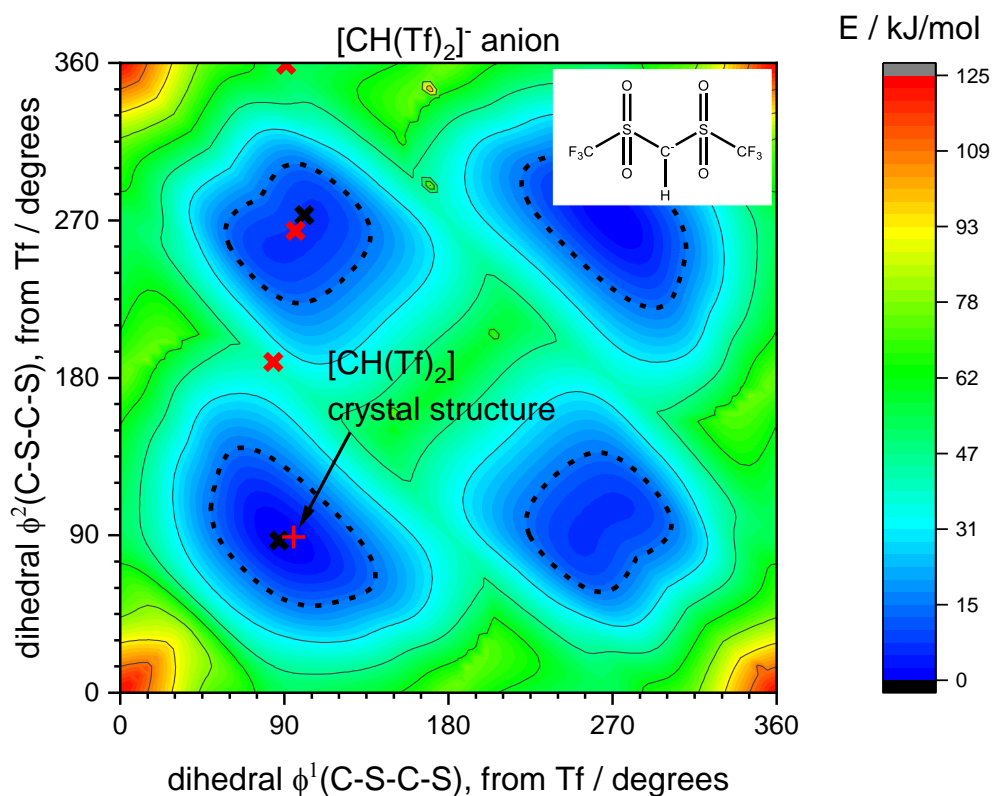

Figure 7: Potential Energy Surface of the [CH(Tf)<sub>2</sub>]<sup>-</sup> anion.

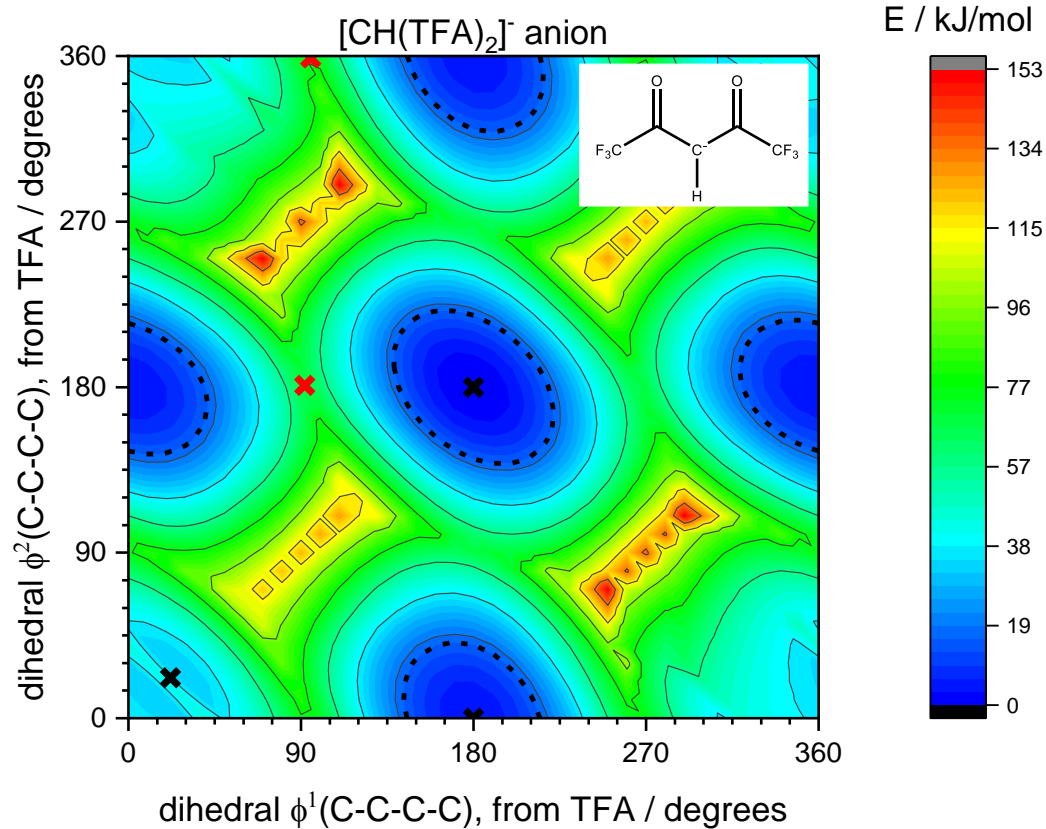

Figure 8: Potential Energy Surface of the [CH(TFA)<sub>2</sub>]<sup>-</sup> anion.

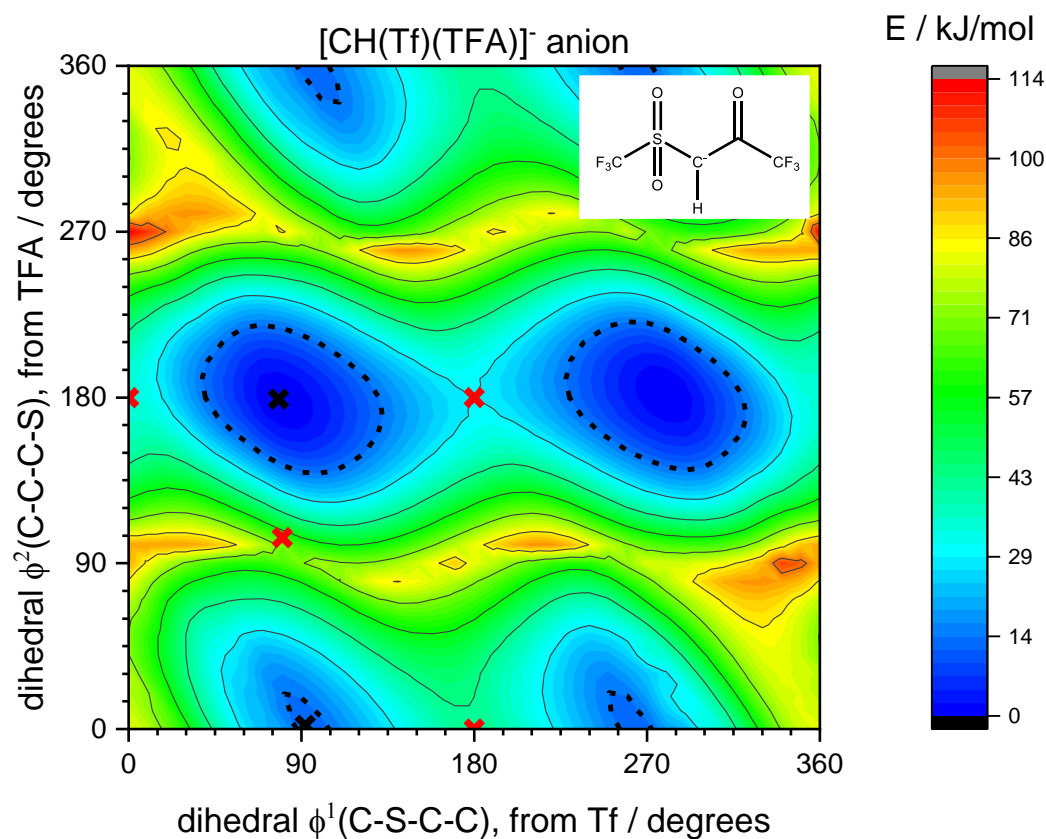

Figure 9: Potential Energy Surface of the [CH(Tf)(TFA)]<sup>-</sup> anion.

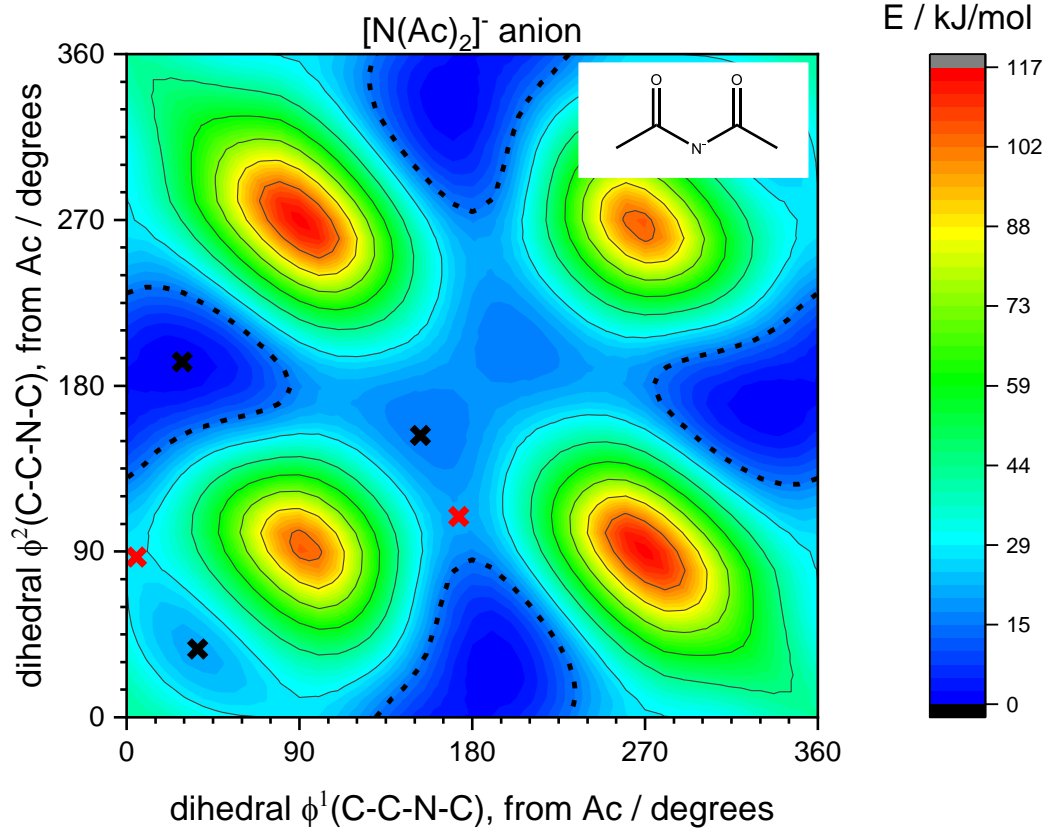

Figure 10: Potential Energy Surface of the [N(Ac)<sub>2</sub>]<sup>-</sup> anion.

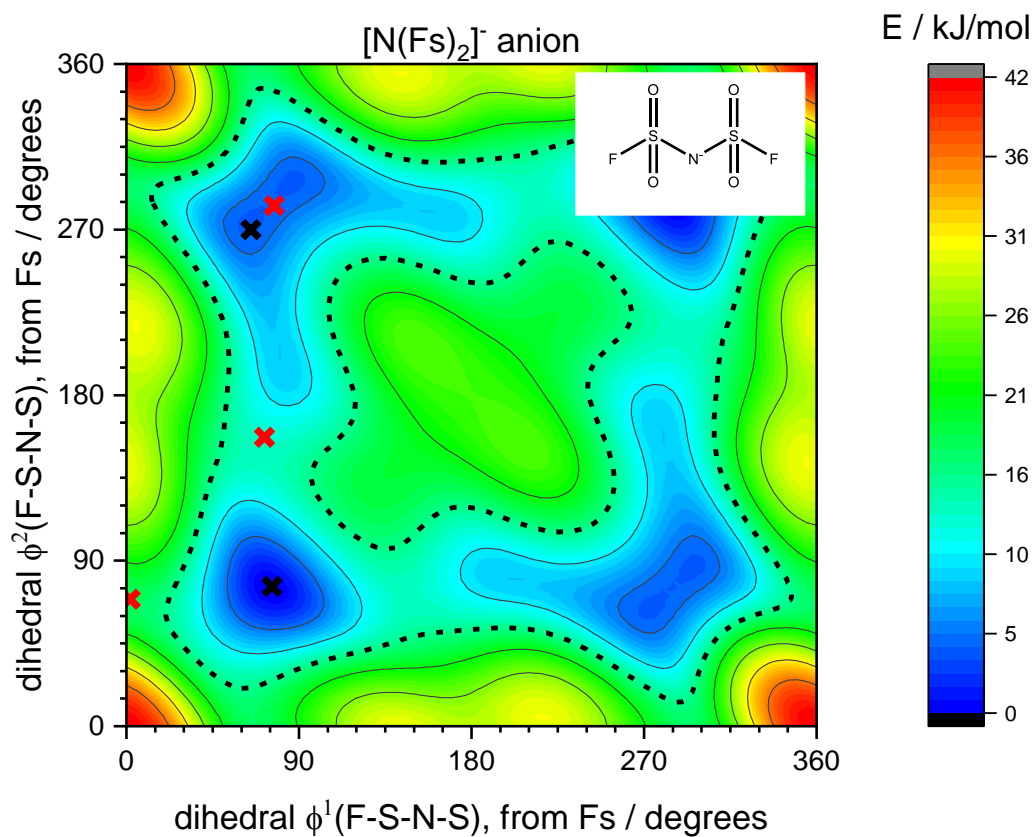

Figure 11: Potential Energy Surface of the [N(Fs)<sub>2</sub>]<sup>-</sup> anion.

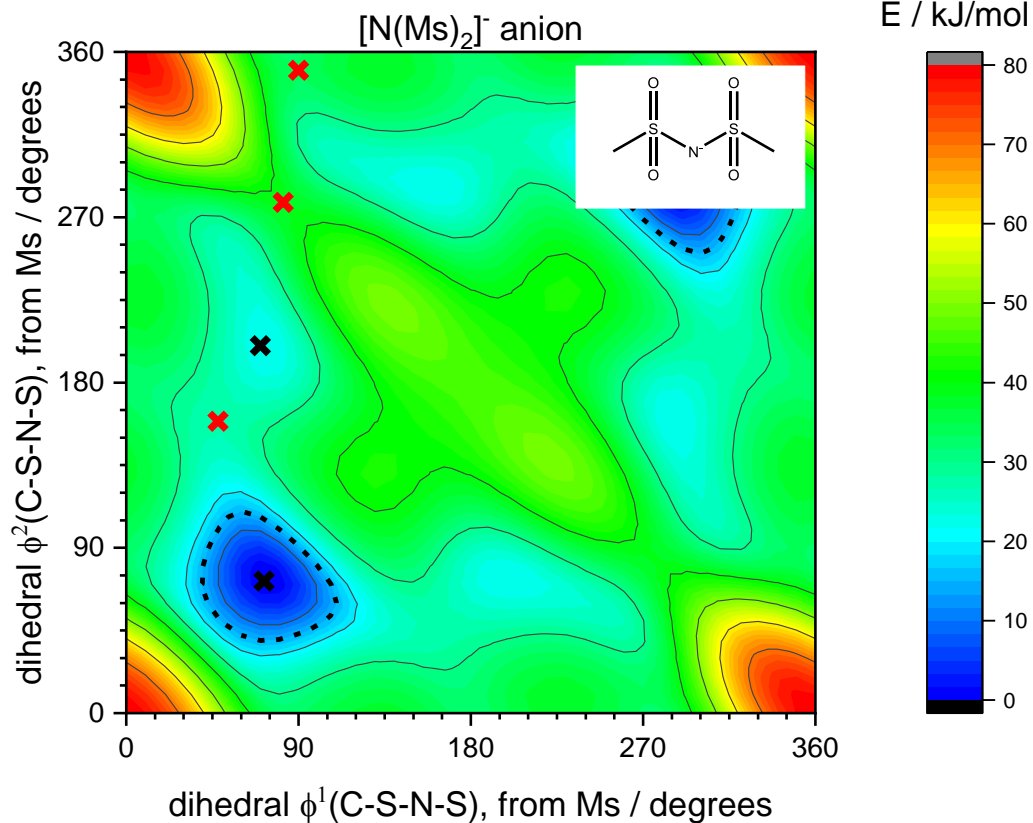

Figure 12: Potential Energy Surface of the  $[\text{N}(\text{Ms})_2]^-$  anion.

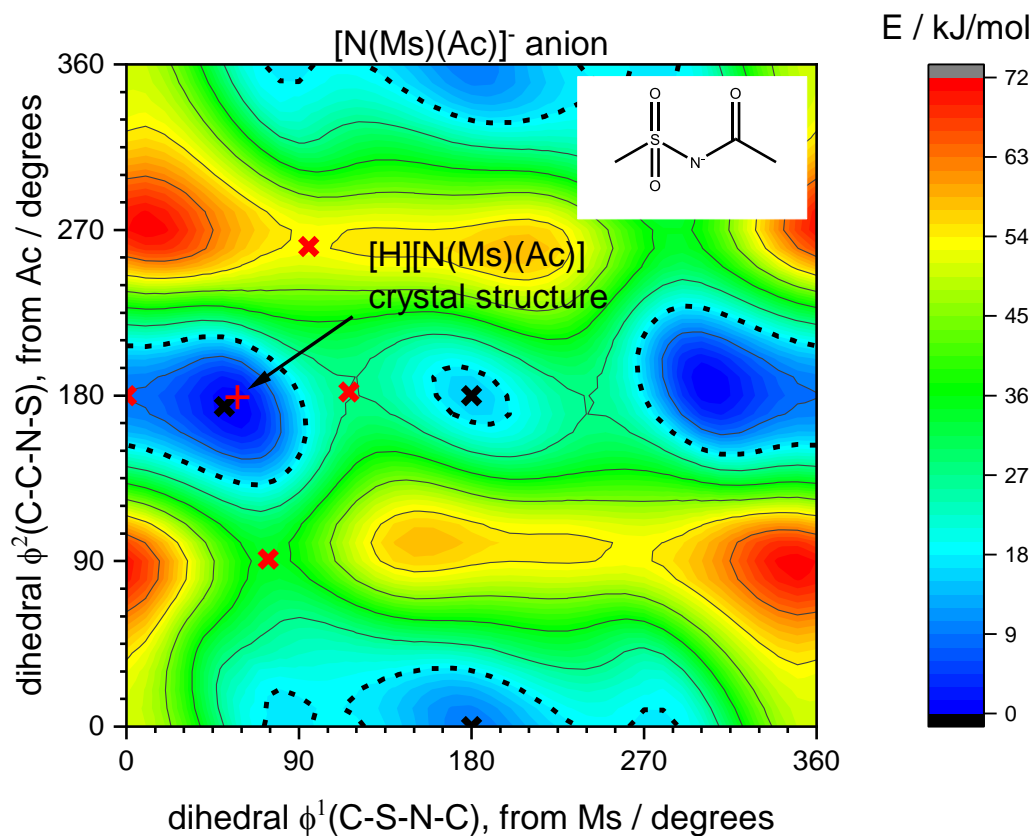

Figure 13: Potential Energy Surface of the  $[\text{N}(\text{Ms})(\text{Ac})]^-$  anion.

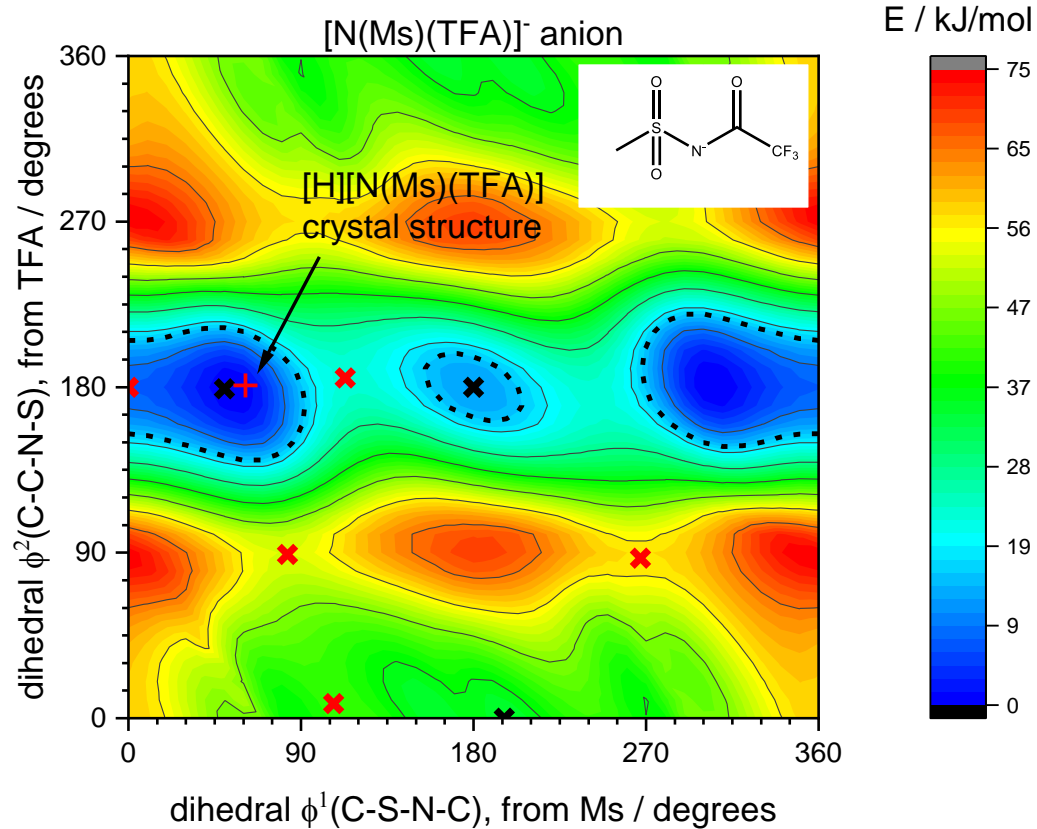

Figure 14: Potential Energy Surface of the [N(Ms)(TFA)]<sup>-</sup> anion.

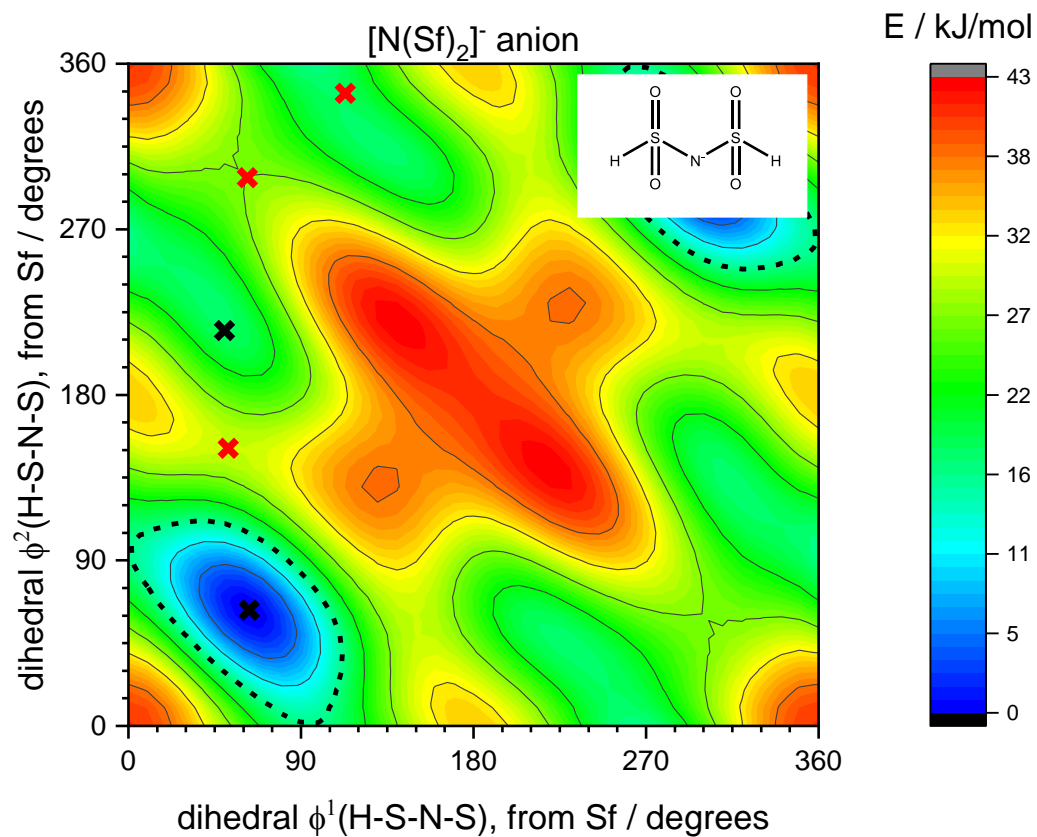

Figure 15: Potential Energy Surface of the [N(Sf)<sub>2</sub>]<sup>-</sup> anion.

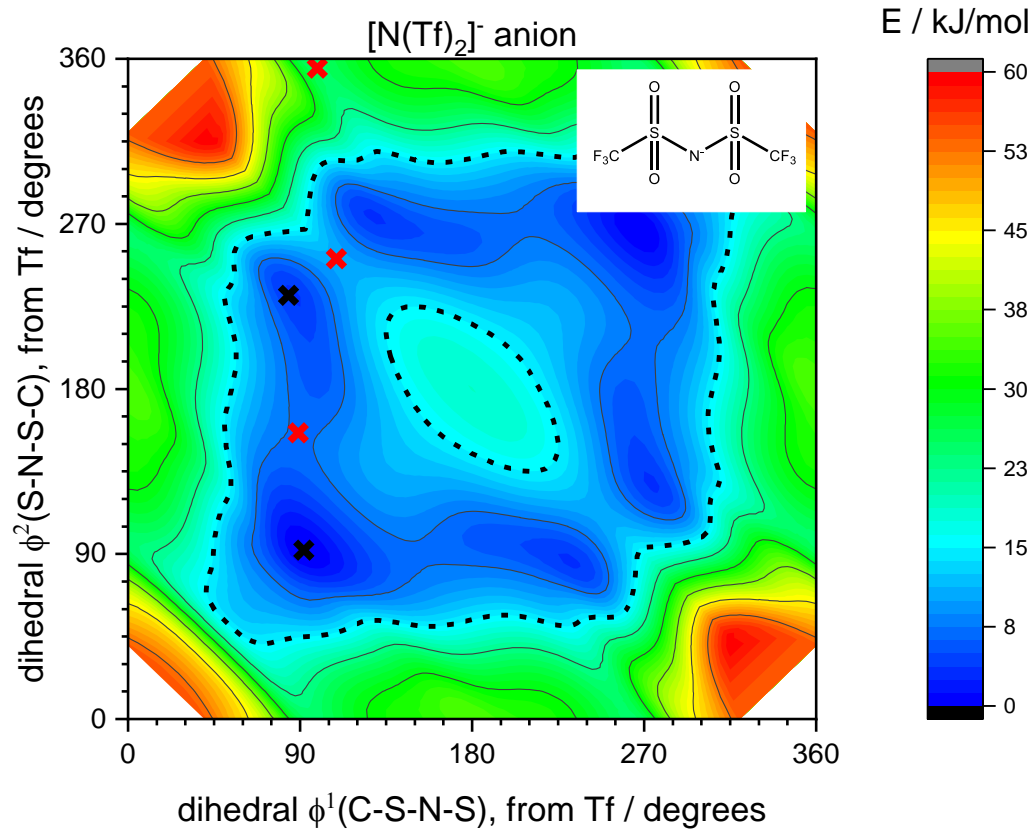

Figure 16: Potential Energy Surface of the  $[N(\text{Tf})_2]^-$  anion.

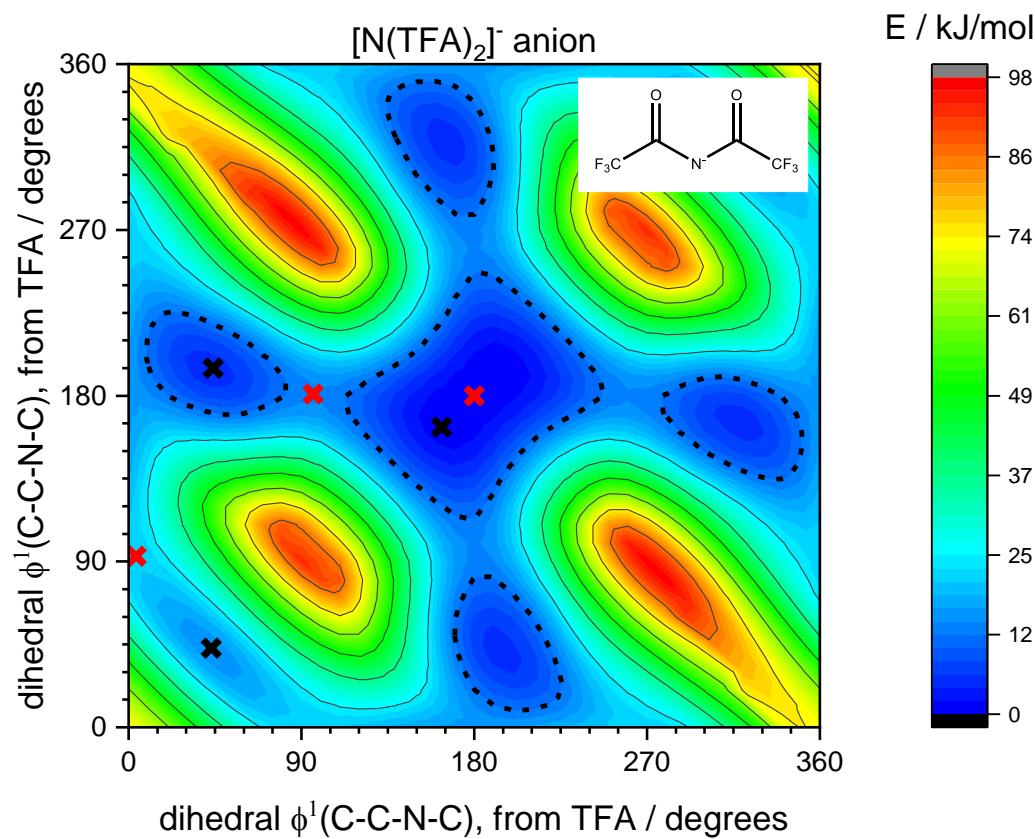

Figure 17: Potential Energy Surface of the  $[N(\text{TFA})_2]^-$  anion.

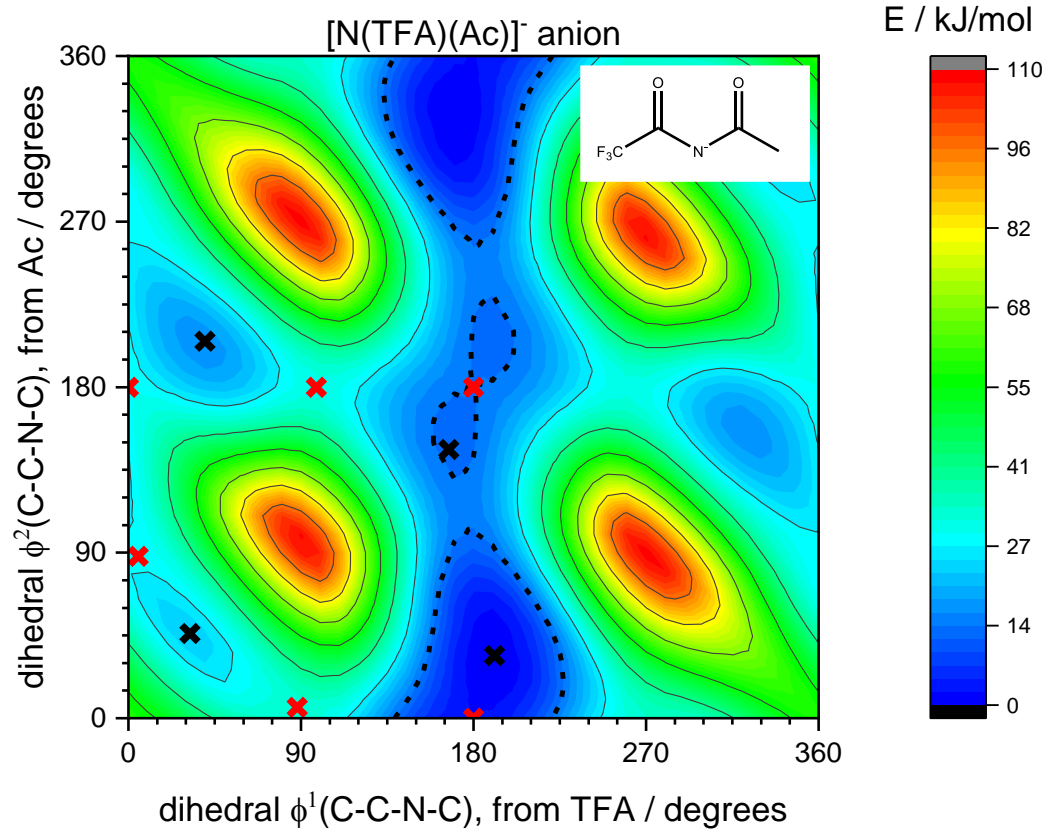

Figure 18: Potential Energy Surface of the [N(TFA)(Ac)]<sup>-</sup> anion.

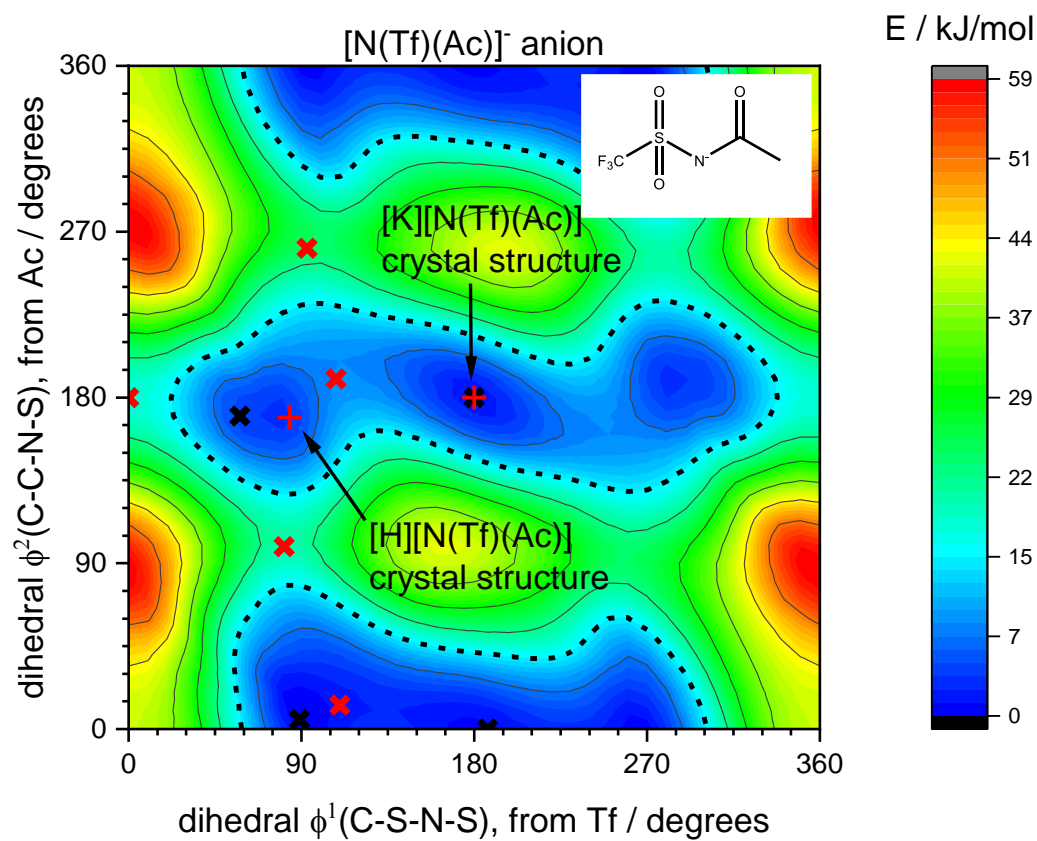

Figure 19: Potential Energy Surface of the [N(Tf)(Ac)]<sup>-</sup> anion.



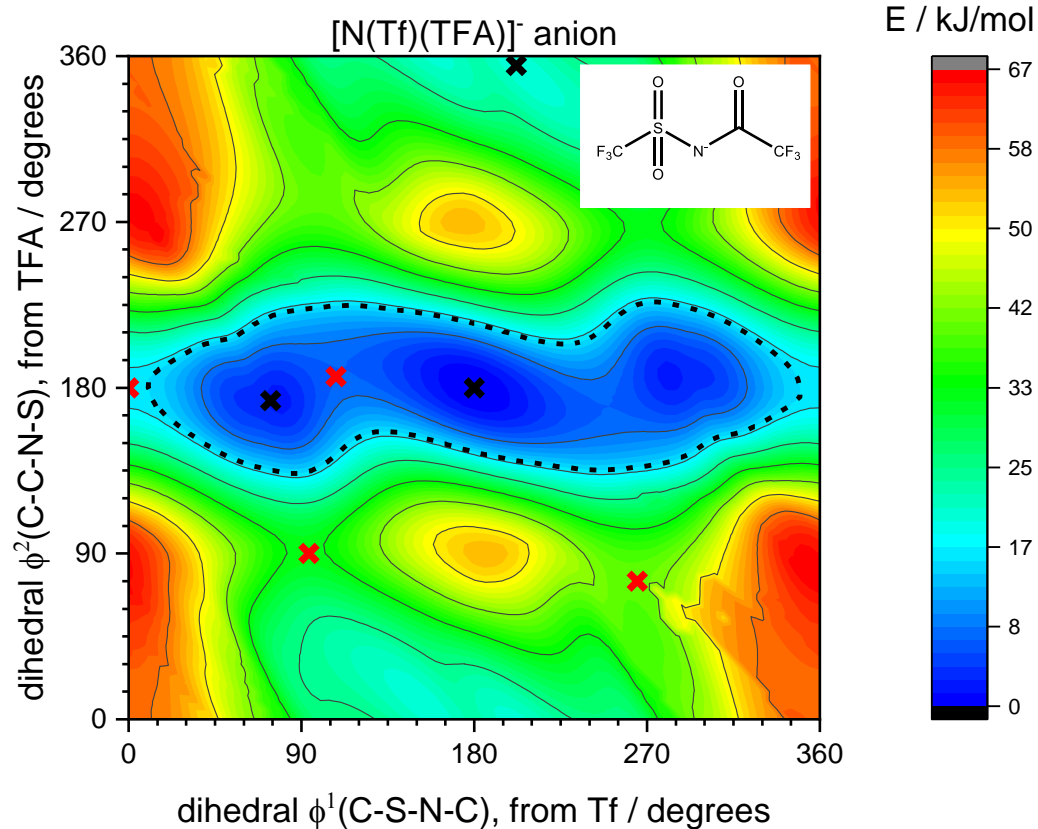

Figure 20: Potential Energy Surface of the [N(Tf)(TFA)]<sup>-</sup> anion.

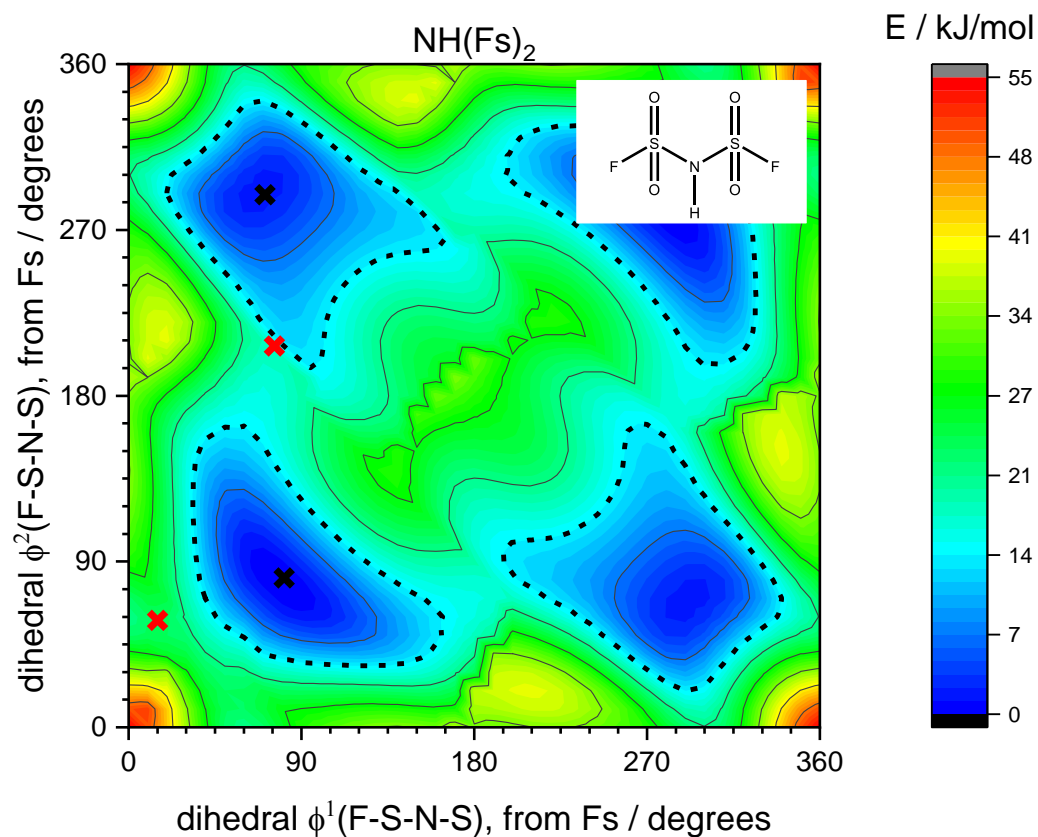

Figure 21: Potential Energy Surface of the NH(Fs)<sub>2</sub> neutral analogue.

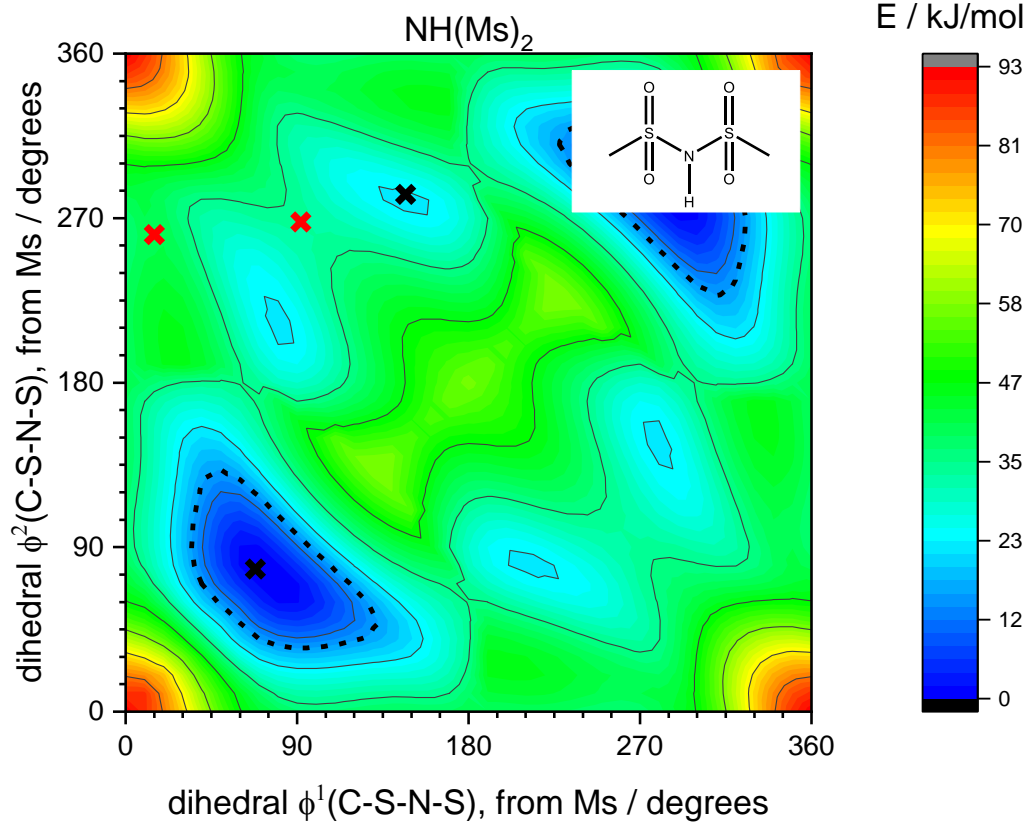

Figure 22: Potential Energy Surface of the NH(Ms)<sub>2</sub> neutral analogue.

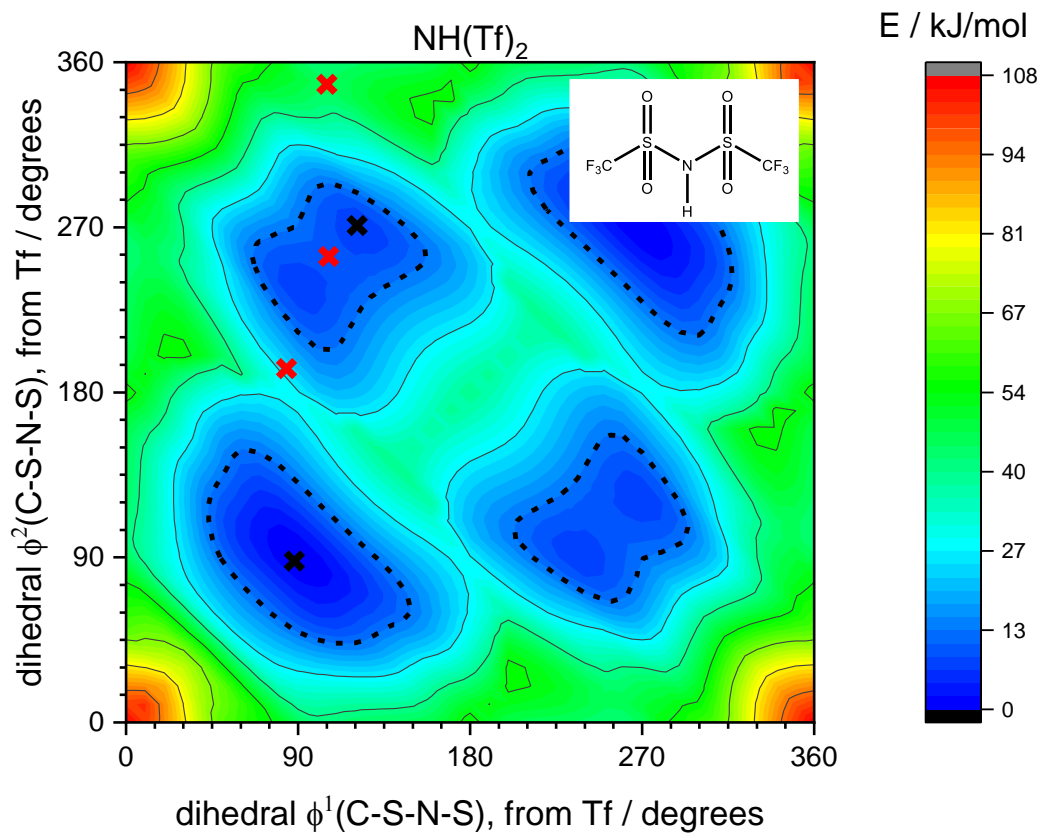

Figure 23: Potential Energy Surface of the NH(Tf)<sub>2</sub> neutral analogue.

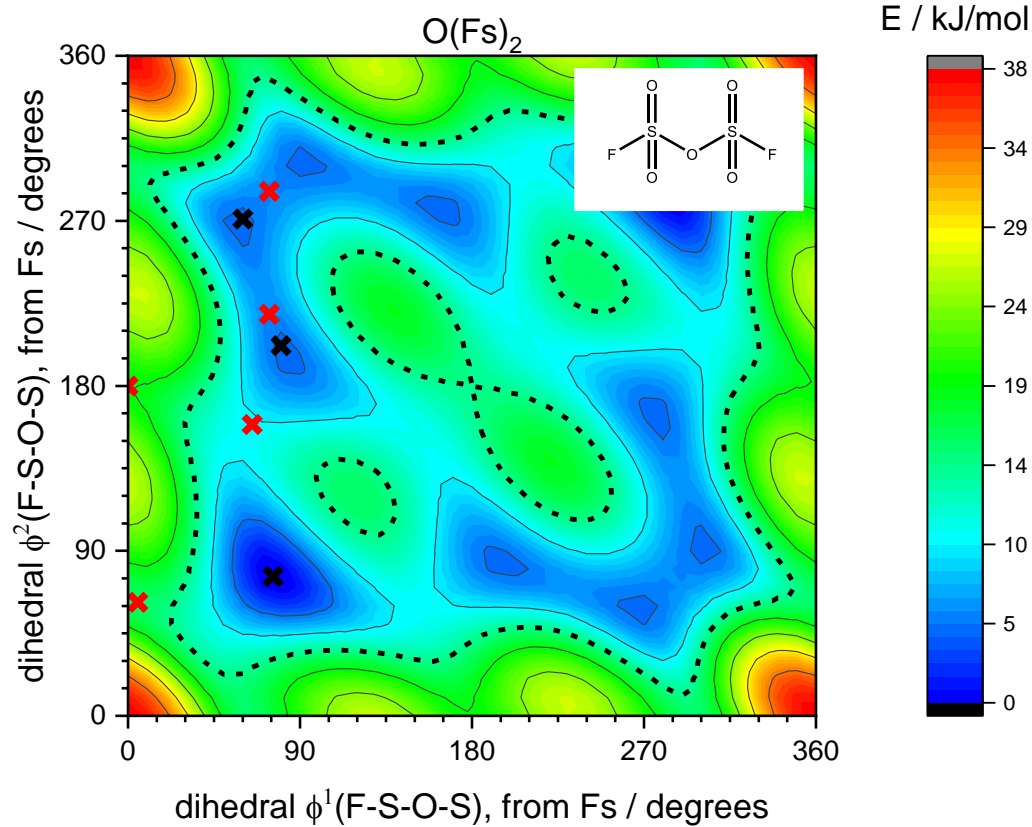

Figure 24: Potential Energy Surface of the  $O(Fs)_2$  neutral analogue.

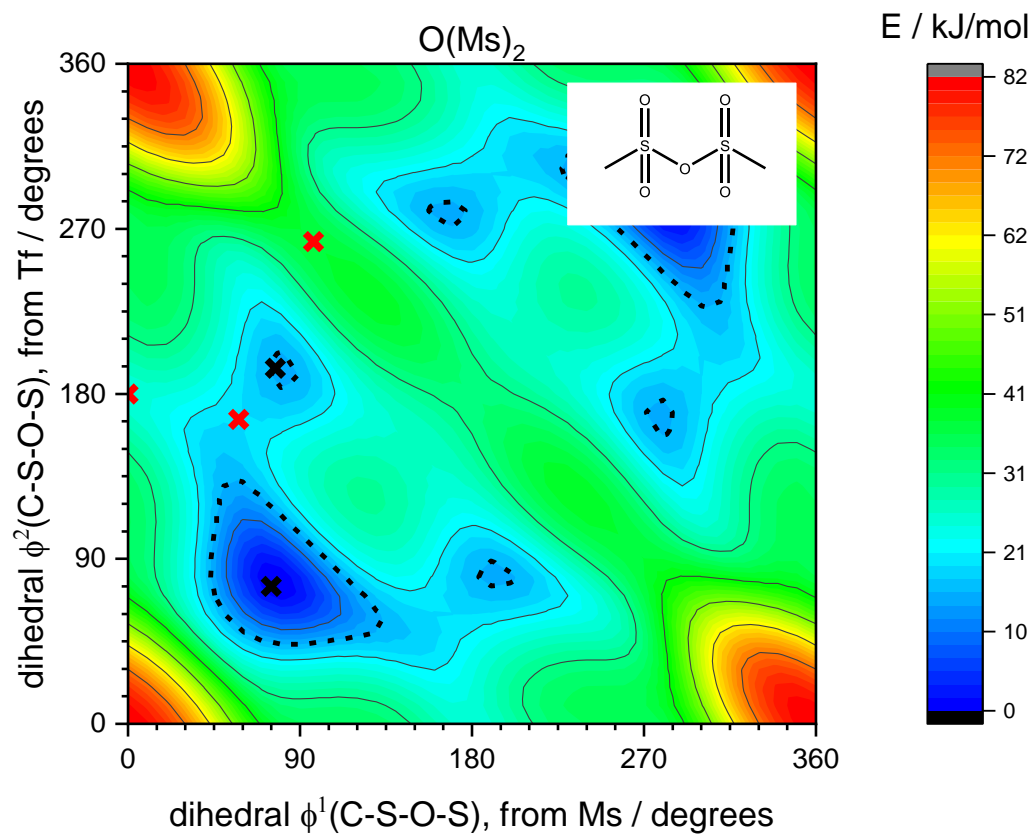

Figure 25: Potential Energy Surface of the  $O(Ms)_2$  neutral analogue.

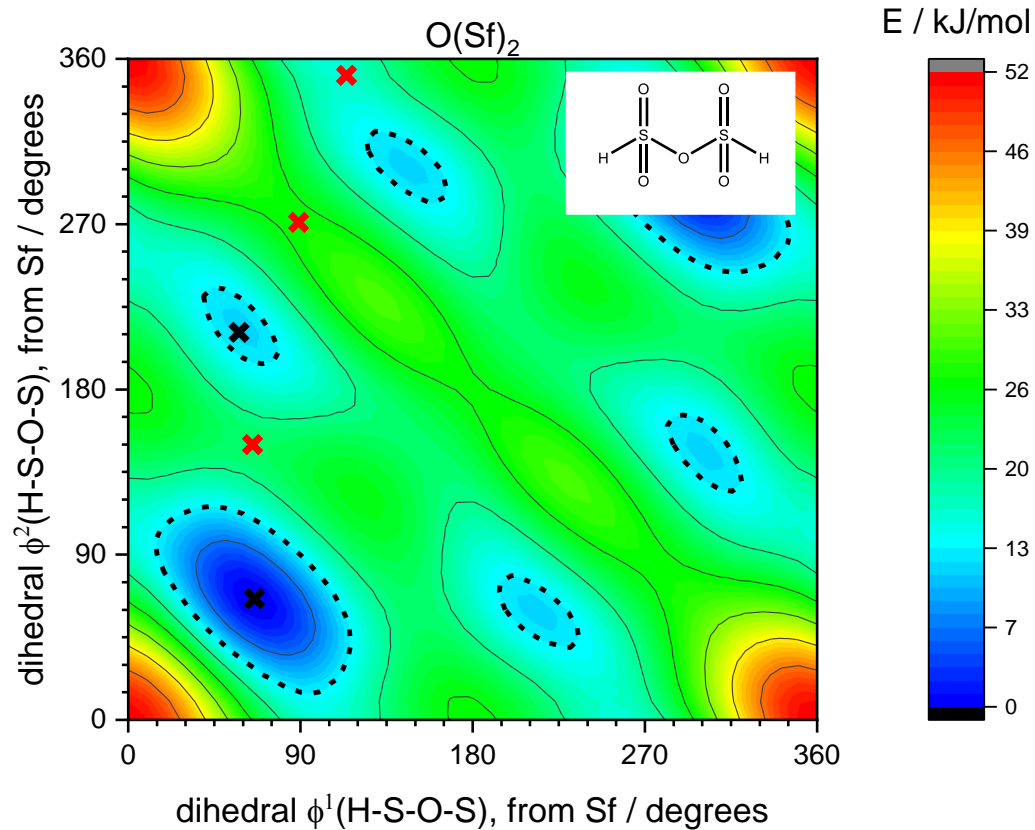

Figure 26: Potential Energy Surface of the  $O(Sf)_2$  neutral analogue.

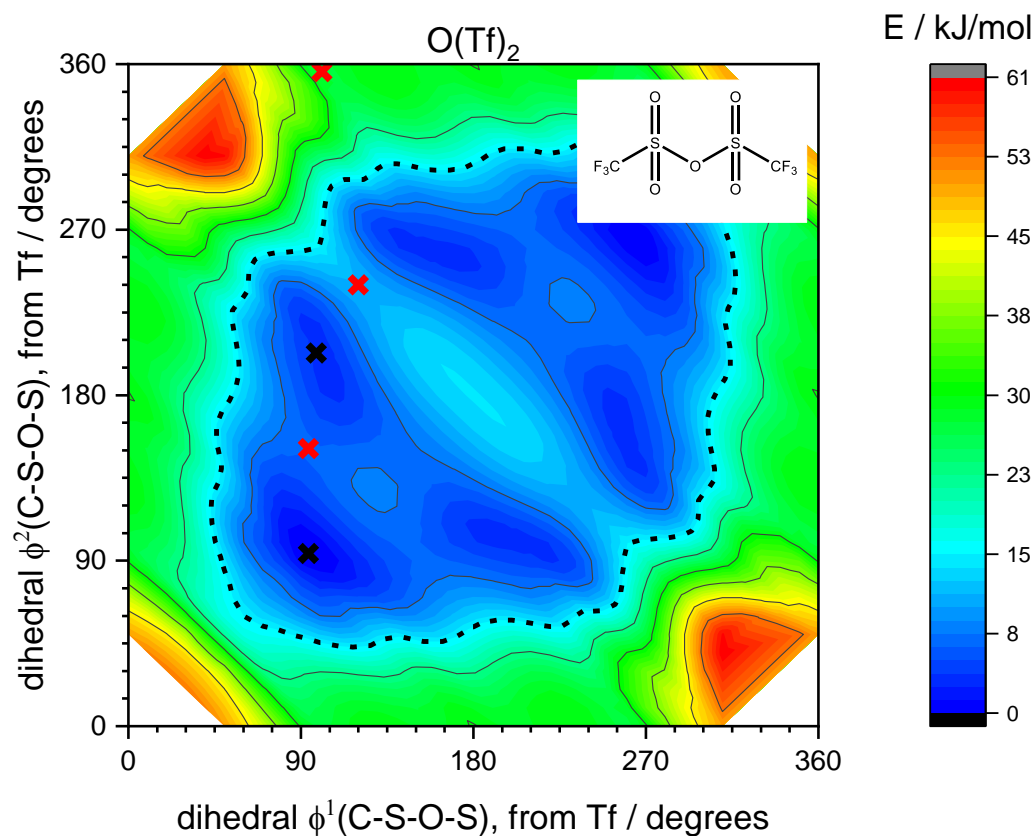

Figure 27: Potential Energy Surface of the  $O(Tf)_2$  neutral analogue.

## 10. NMR spectra of neat ILs

NMR diffusometry was performed on neat, dried samples with external reference. The recorded NMR spectra, Figure 28-33, are thus very sensitive to impurities. Furthermore, we provide the raw data for these samples in the folders 'BMIMMsNTFA' and 'BMIMTfNAC' accompanying this supporting information.

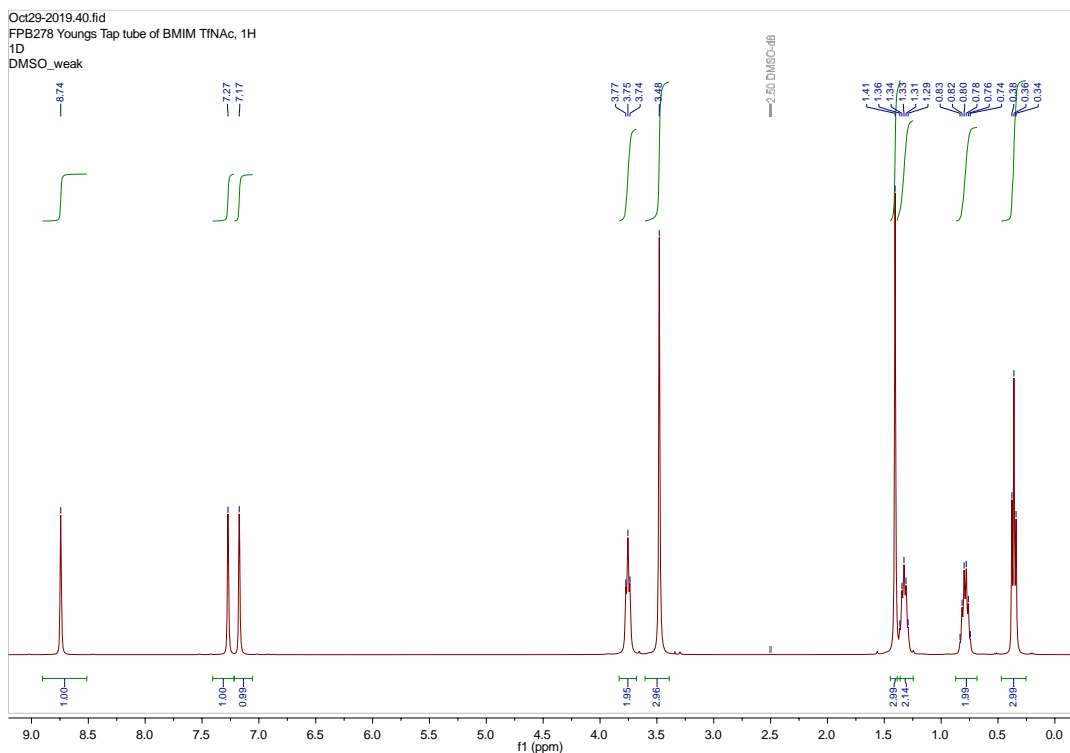

Figure 28: Proton NMR spectrum of neat  $[C_4C_1Im][N(Tf)(Ac)]$

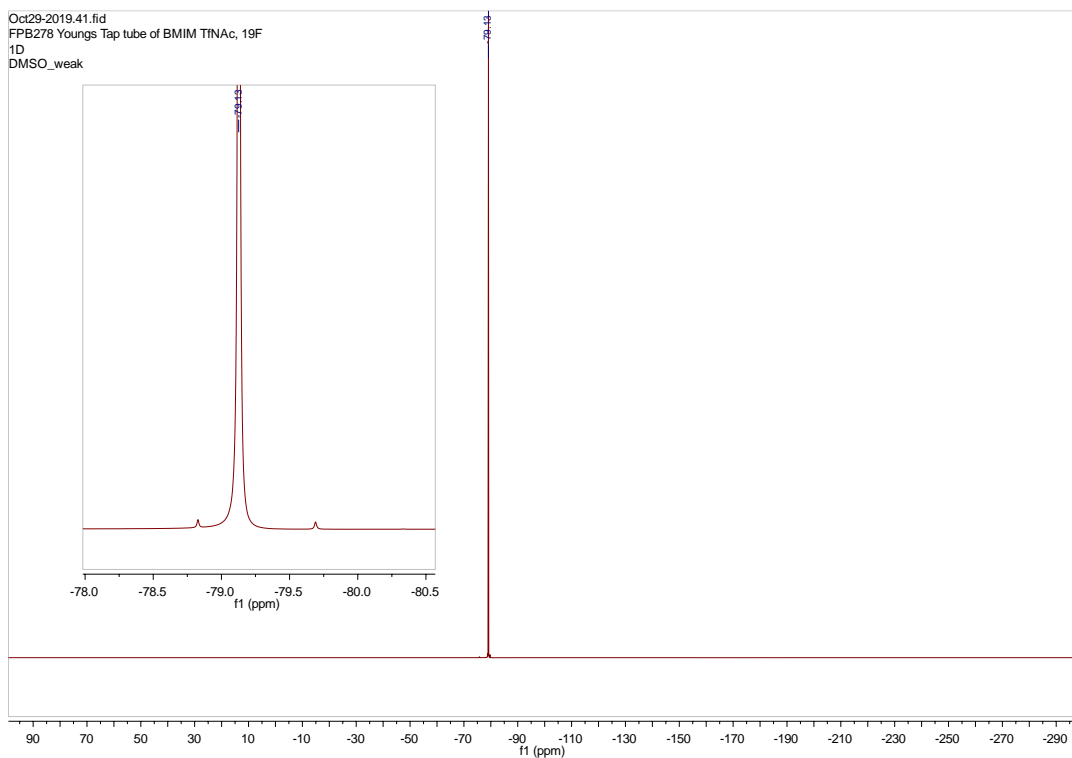

Figure 29: Fluorine NMR spectrum of neat  $[C_4C_1Im][N(Tf)(Ac)]$

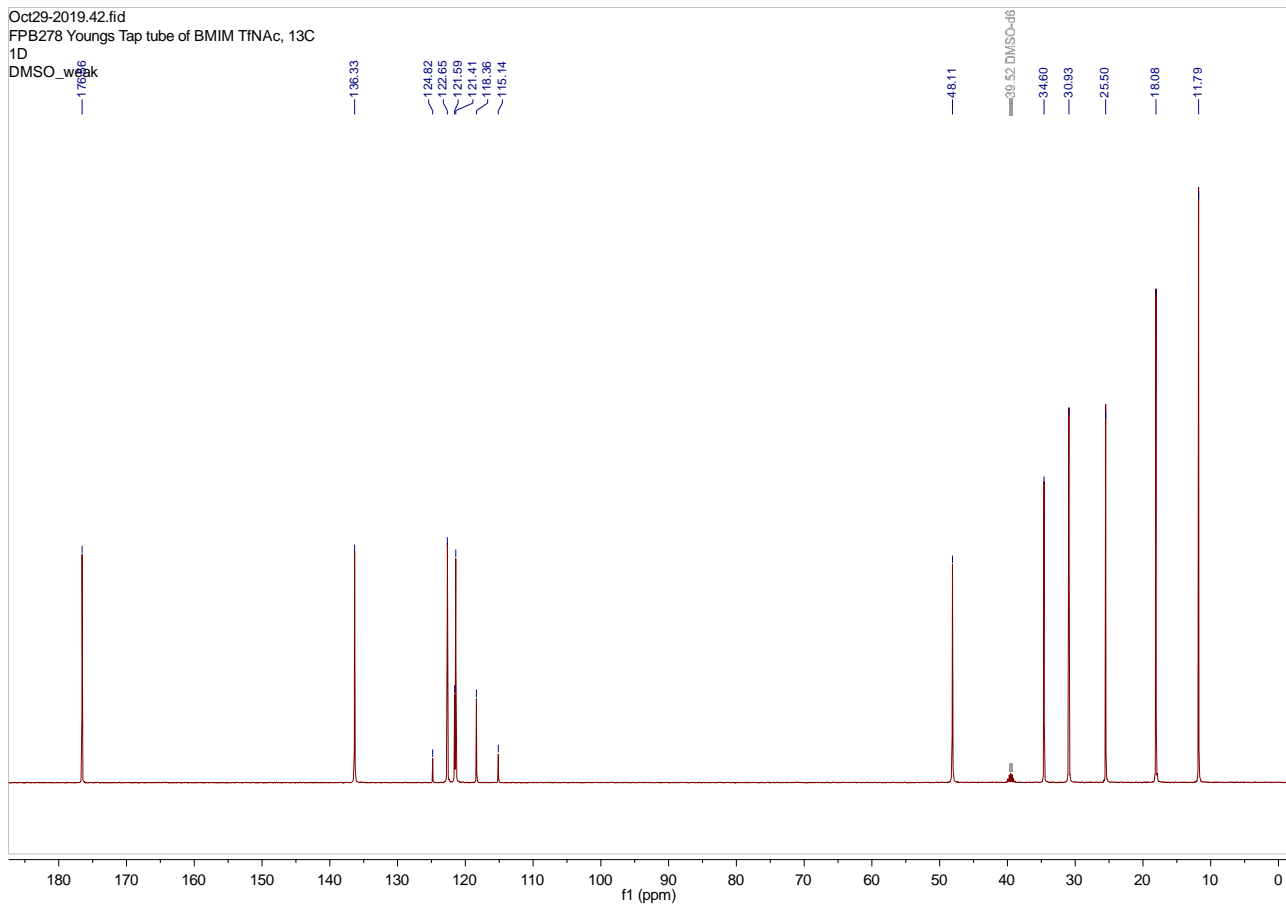

Figure 30: Carbon NMR spectrum of neat  $[C_4C_1Im][N(Tf)(Ac)]$

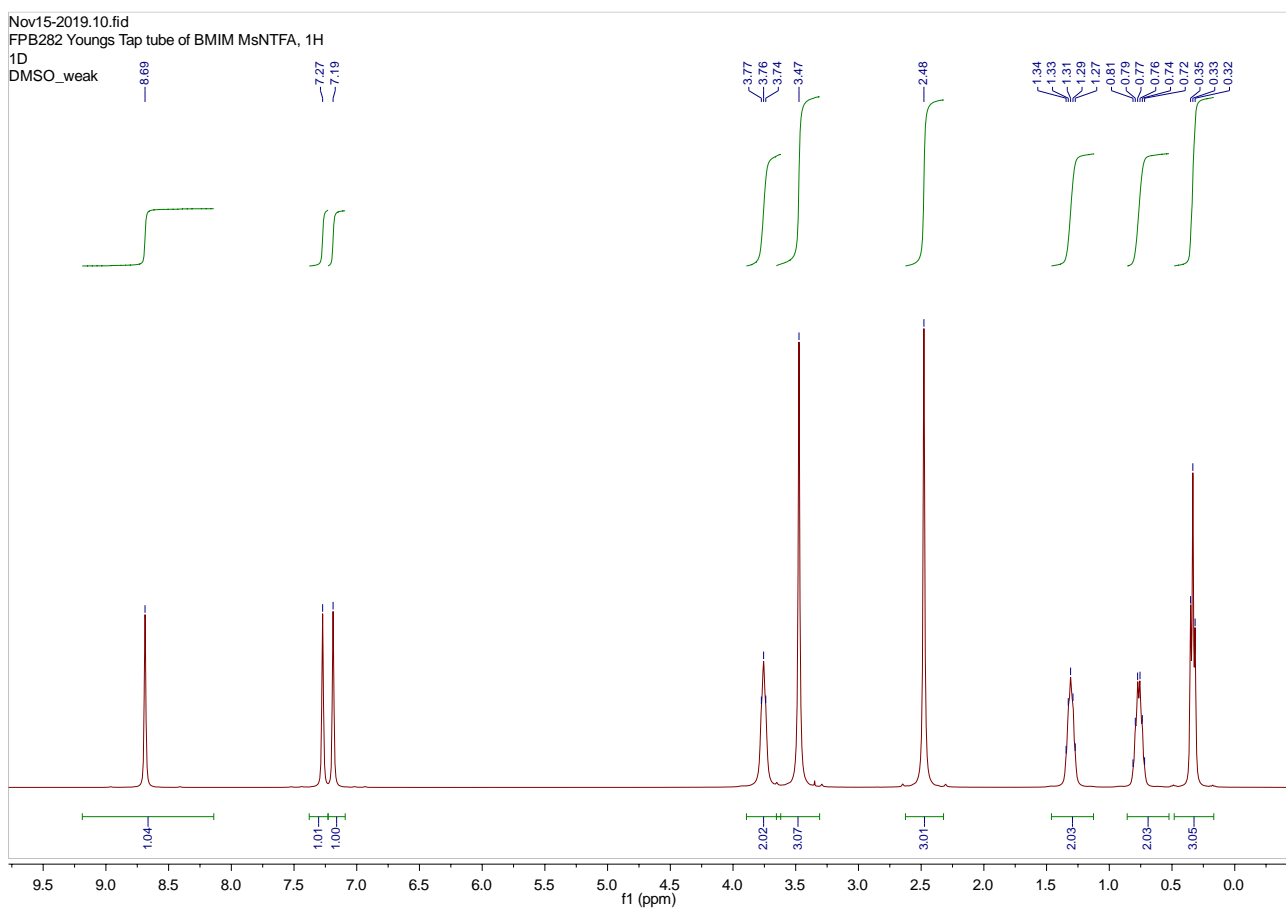

Figure 31: Proton NMR spectrum of neat  $[C_4C_1Im][N(Ms)(TFA)]$

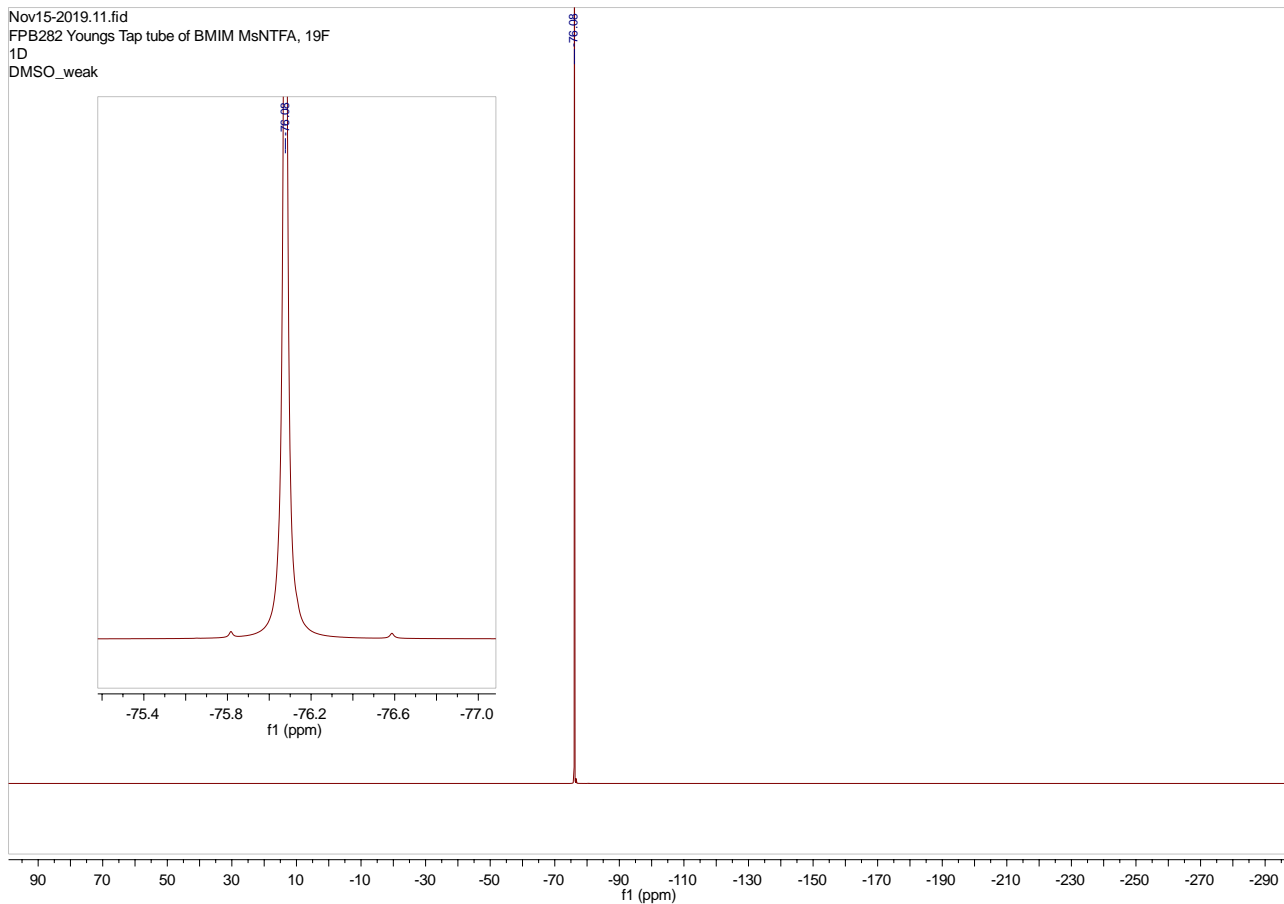

Figure 32: Fluorine NMR spectrum of neat  $[C_4C_1Im][N(Ms)(TFA)]$

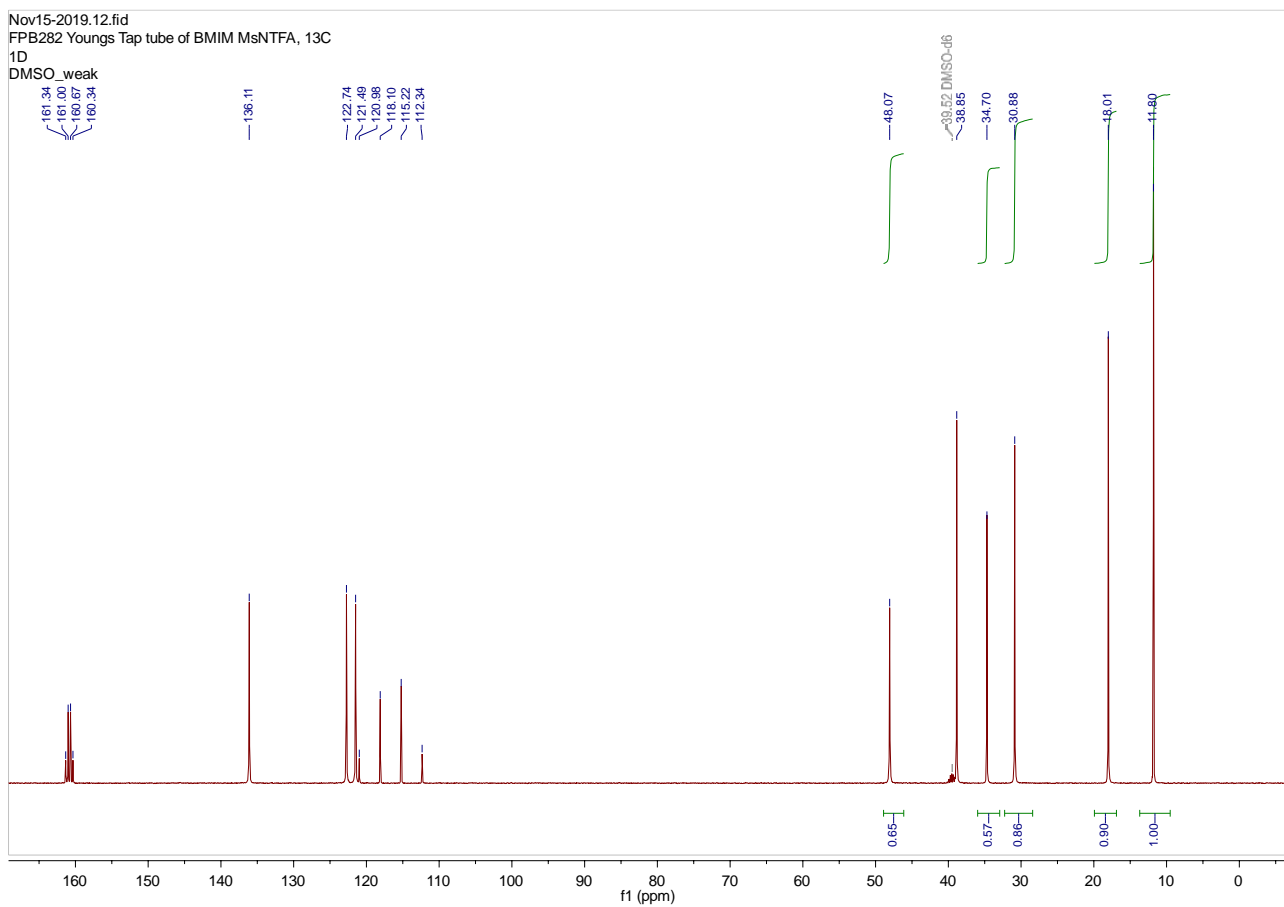

Figure 33: Carbon NMR spectrum of neat  $[C_4C_1Im][N(Ms)(TFA)]$

## 11. NMR spectra of precursors

NMR spectra of the precursors [H][N(Tf)(Ac)] (Figure 34 – Figure 36), [Na][N(Tf)(Ac)] (Figure 37 – Figure 39), [H][N(Ms)(TFA)] (Figure 40 – Figure 42) and [Na][N(Ms)(TFA)] (Figure 43 – Figure 45) are given below.

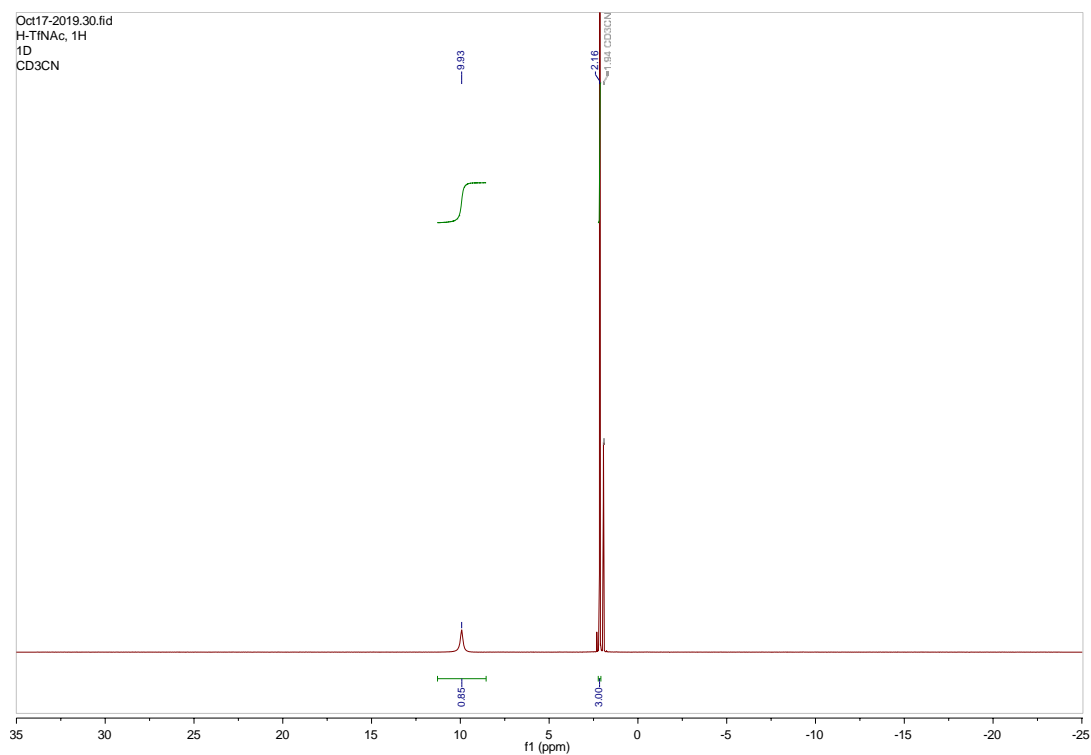

Figure 34: Proton NMR spectrum of [H][N(Tf)(Ac)].

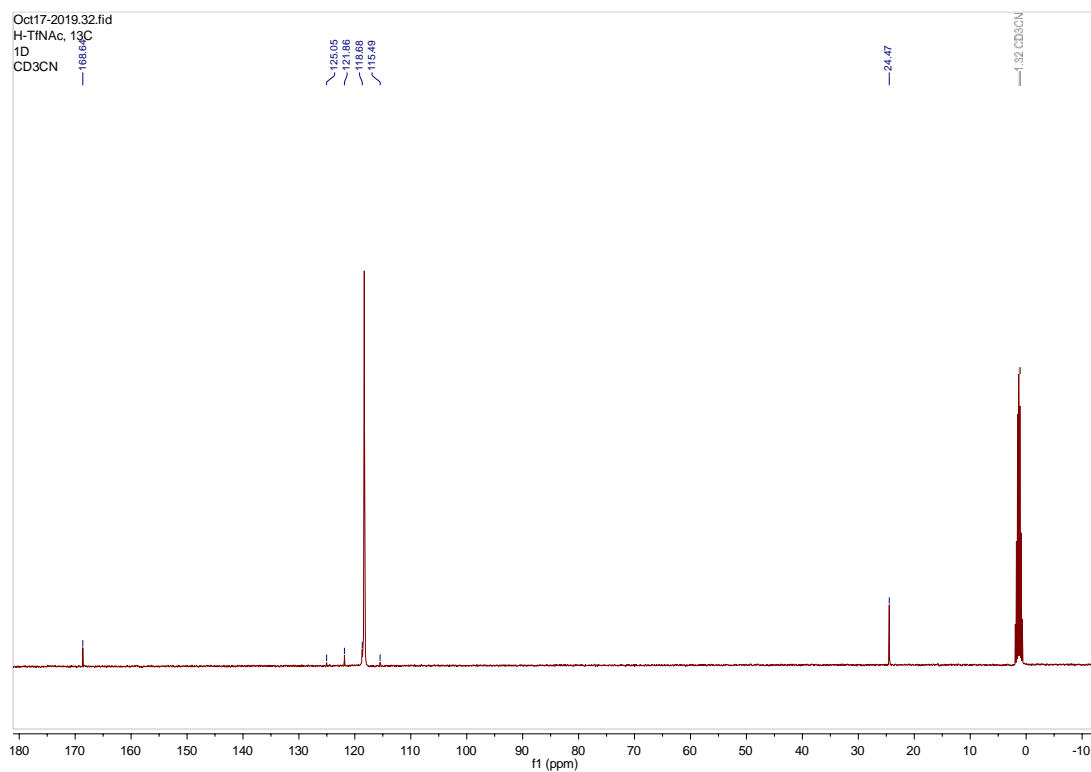

Figure 35: Carbon NMR spectrum of [H][N(Tf)(Ac)].



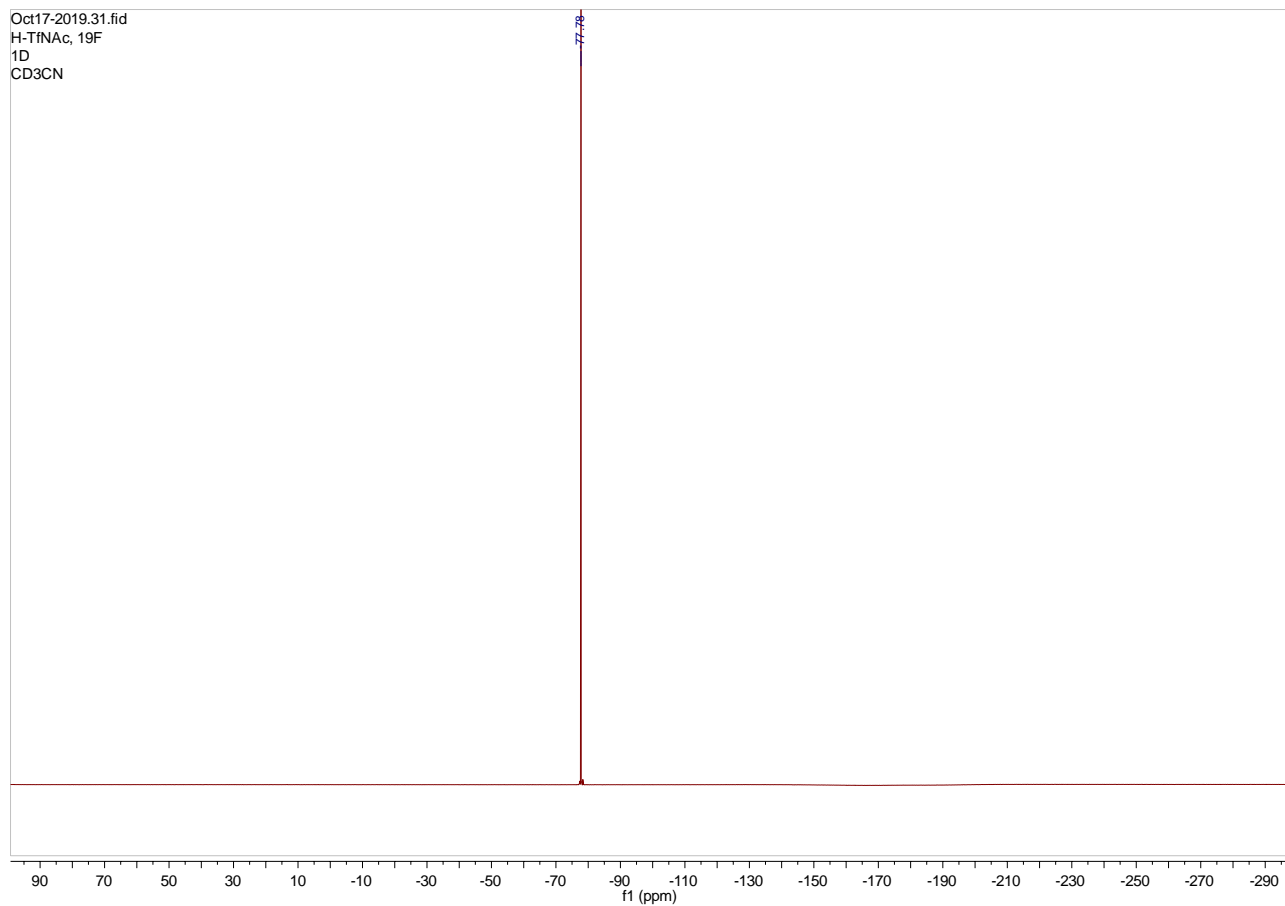

Figure 36: Fluorine NMR spectrum of  $[H][N(Tf)(Ac)]$ .

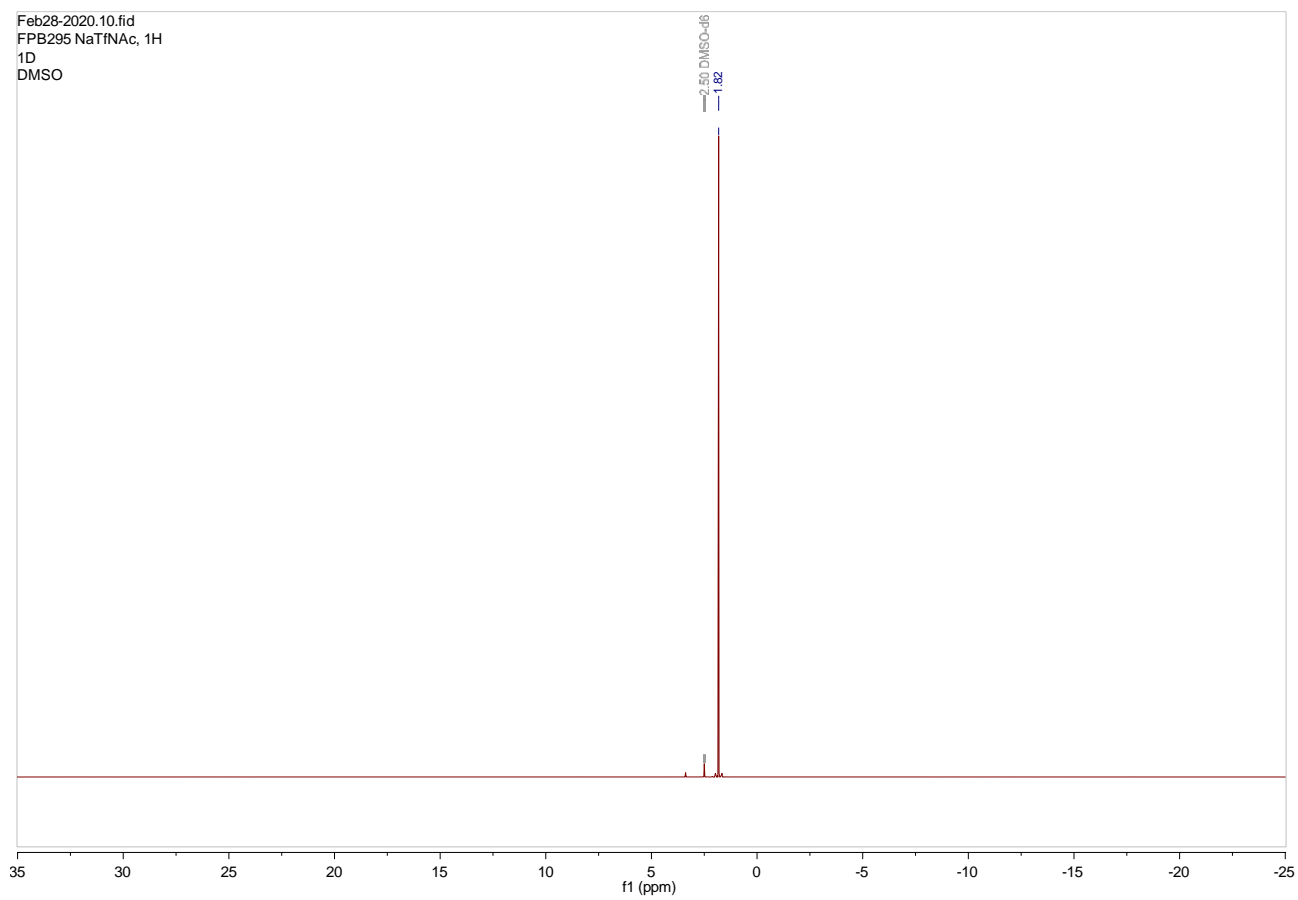

Figure 37: Proton NMR spectrum of  $[Na][N(Tf)(Ac)]$ .

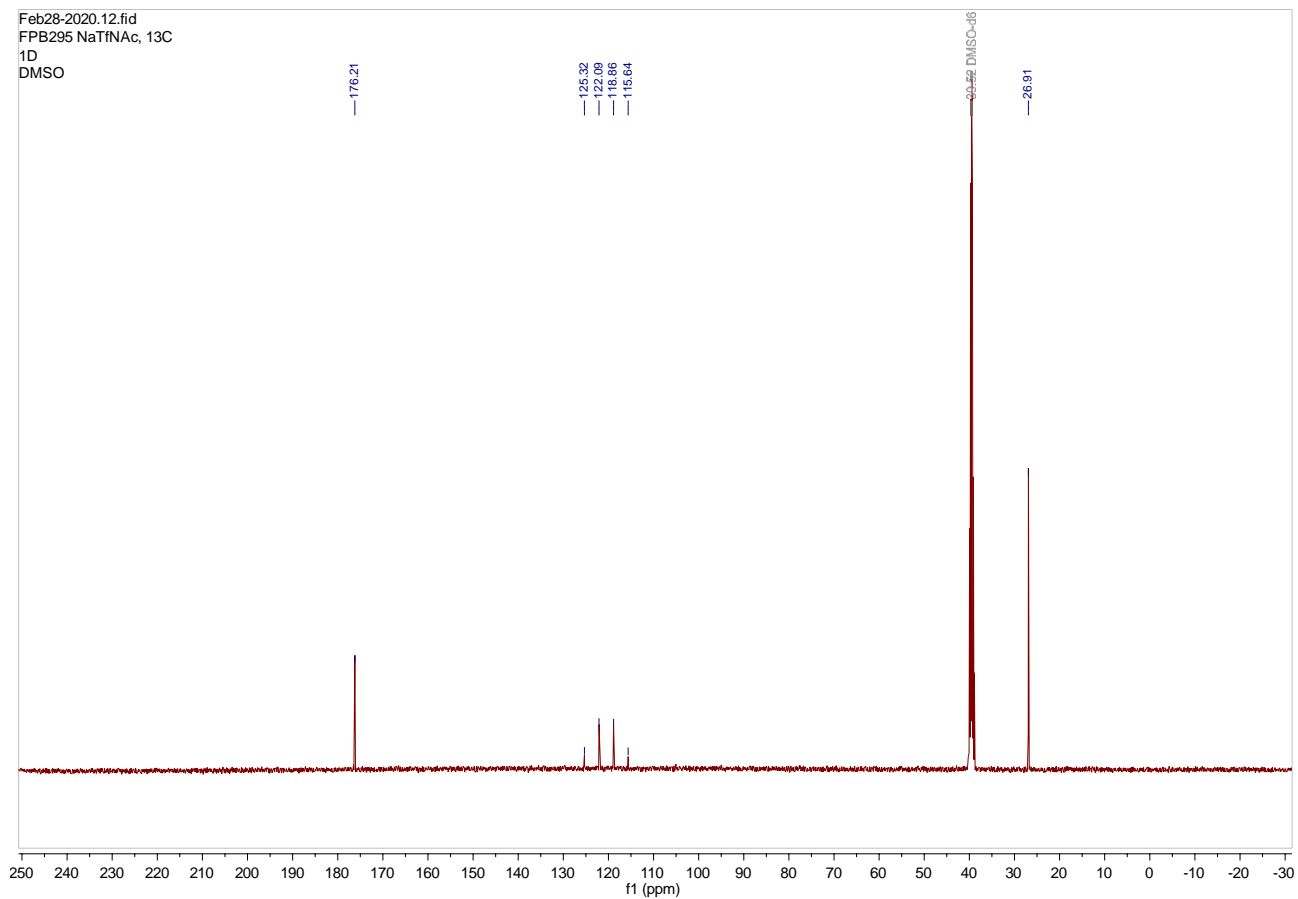

Figure 38: Carbon NMR spectrum of  $[Na][N(Tf)(Ac)]$ .

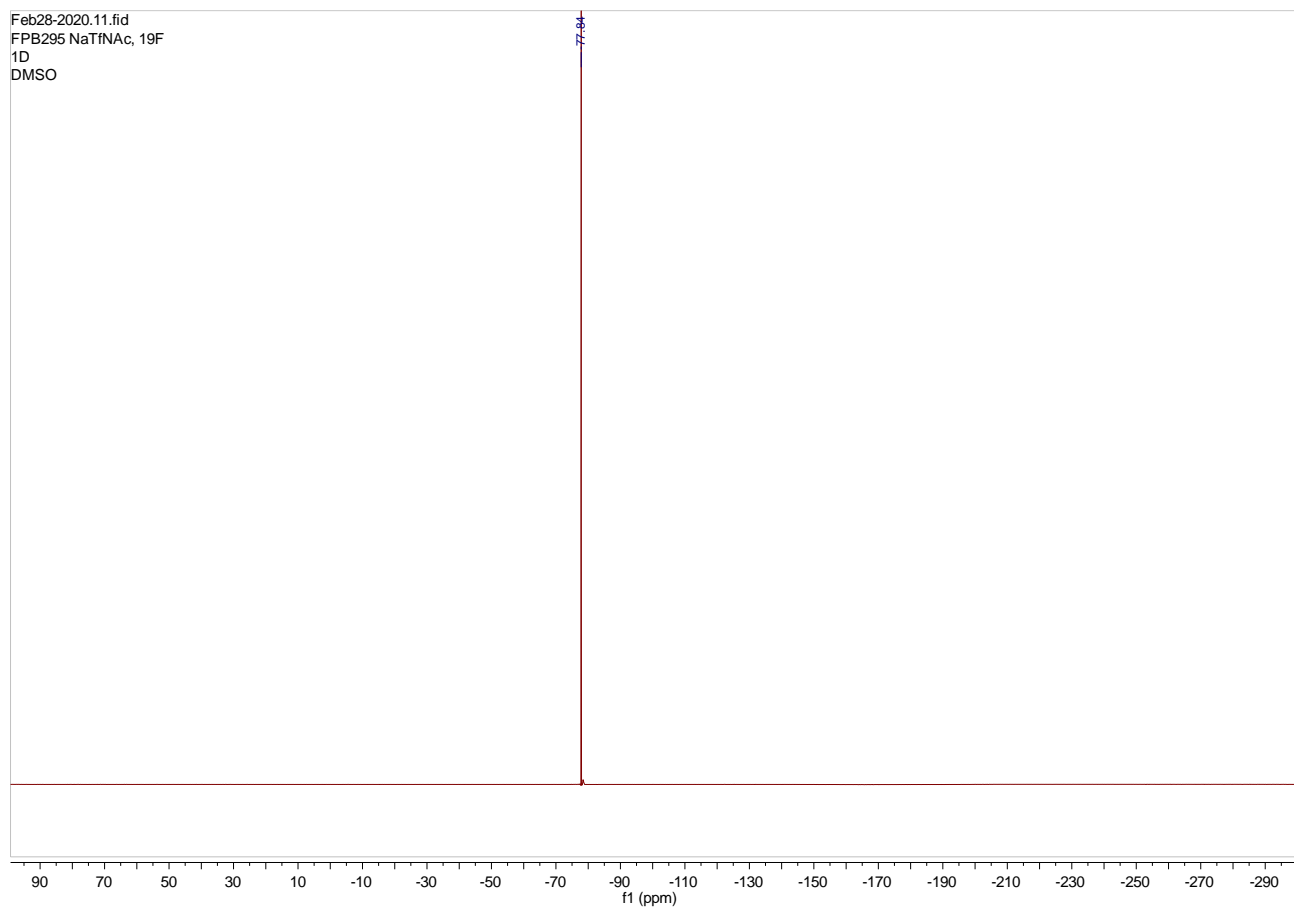

Figure 39: Fluorine NMR spectrum of  $[Na][N(Tf)(Ac)]$ .

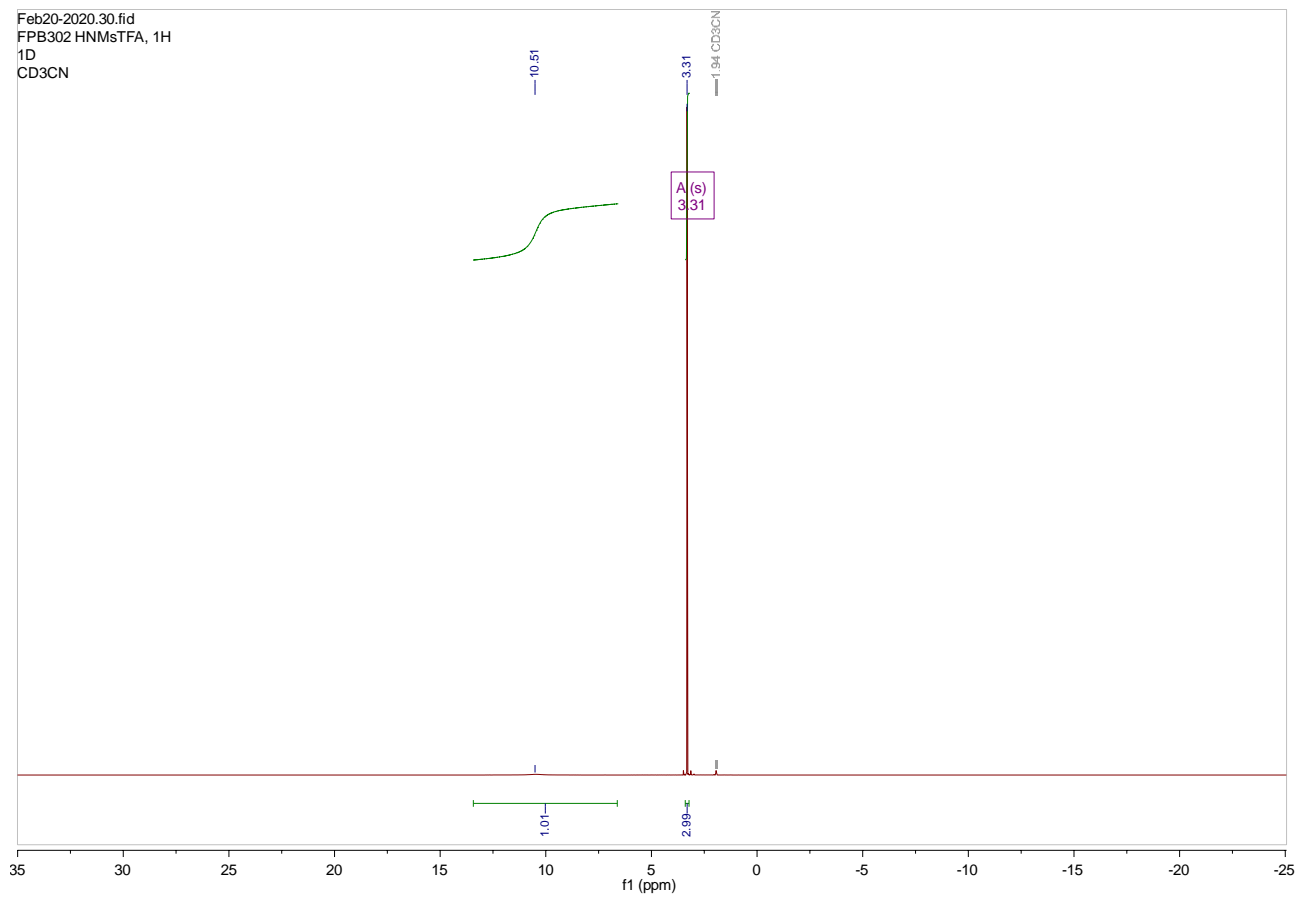

Figure 40: Proton NMR spectrum of  $[H][N(Ms)(TFA)]$ .

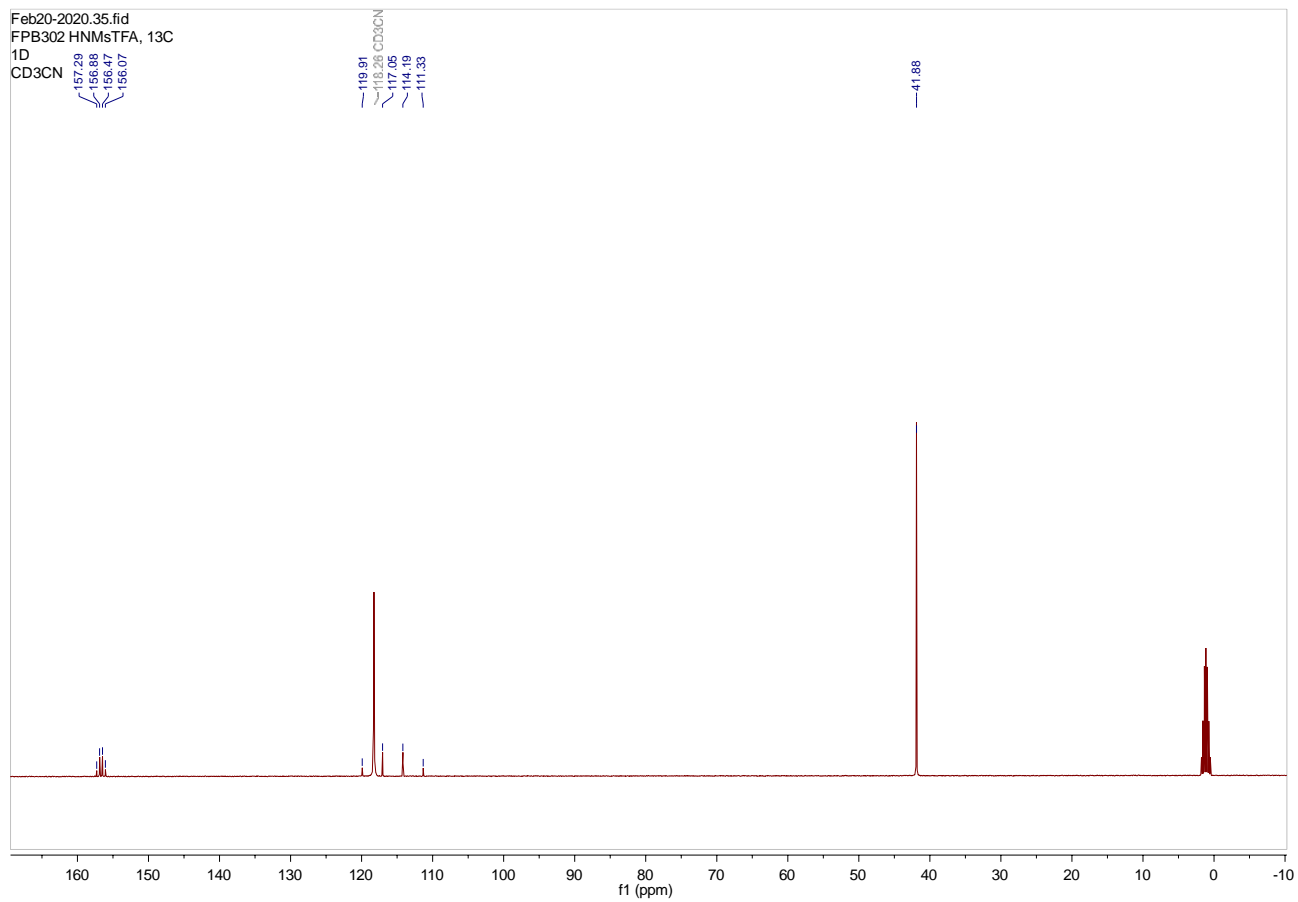

Figure 41: Carbon NMR spectrum of  $[H][N(Ms)(TFA)]$ .

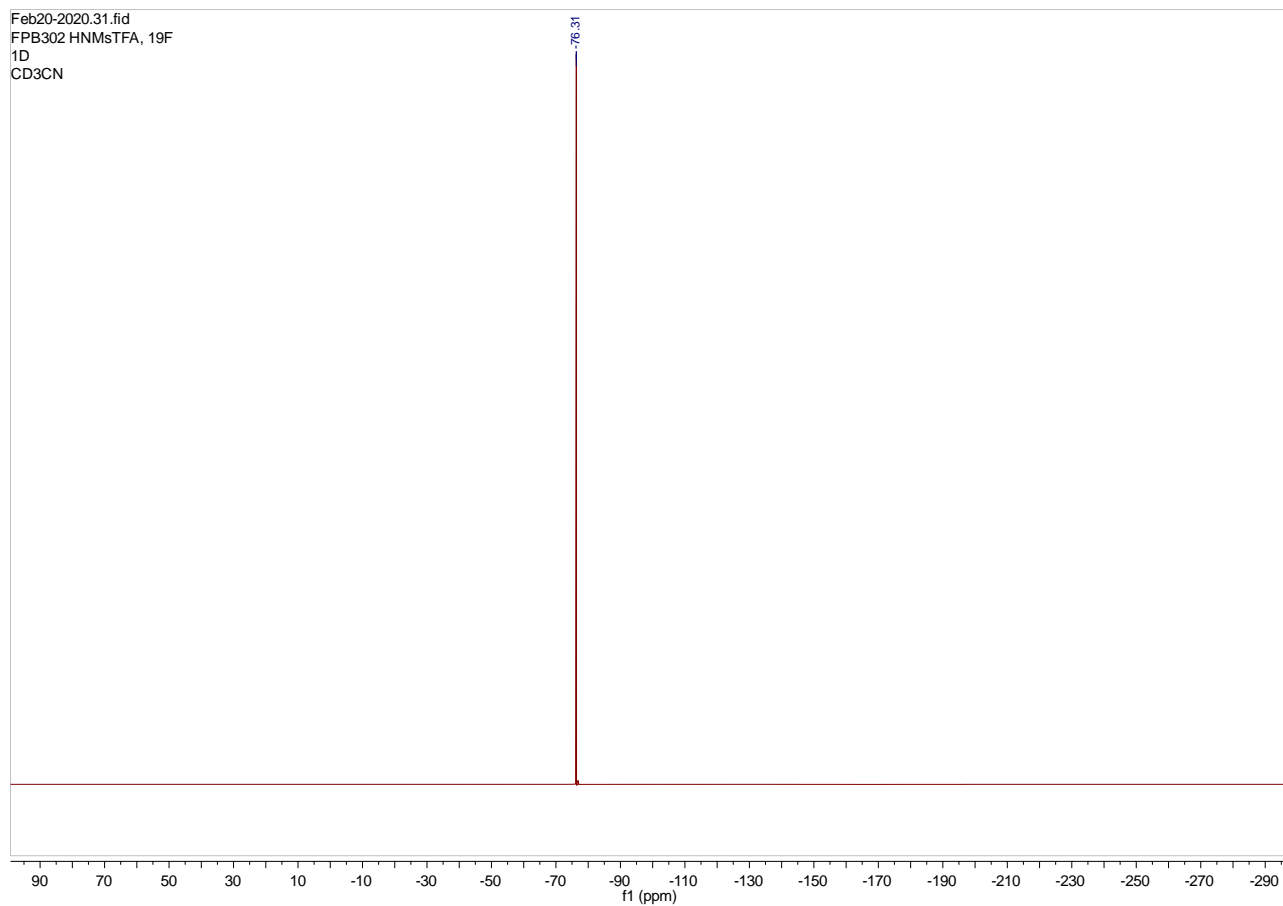

Figure 42: Fluorine NMR spectrum of  $[H][N(Ms)(TFA)]$ .

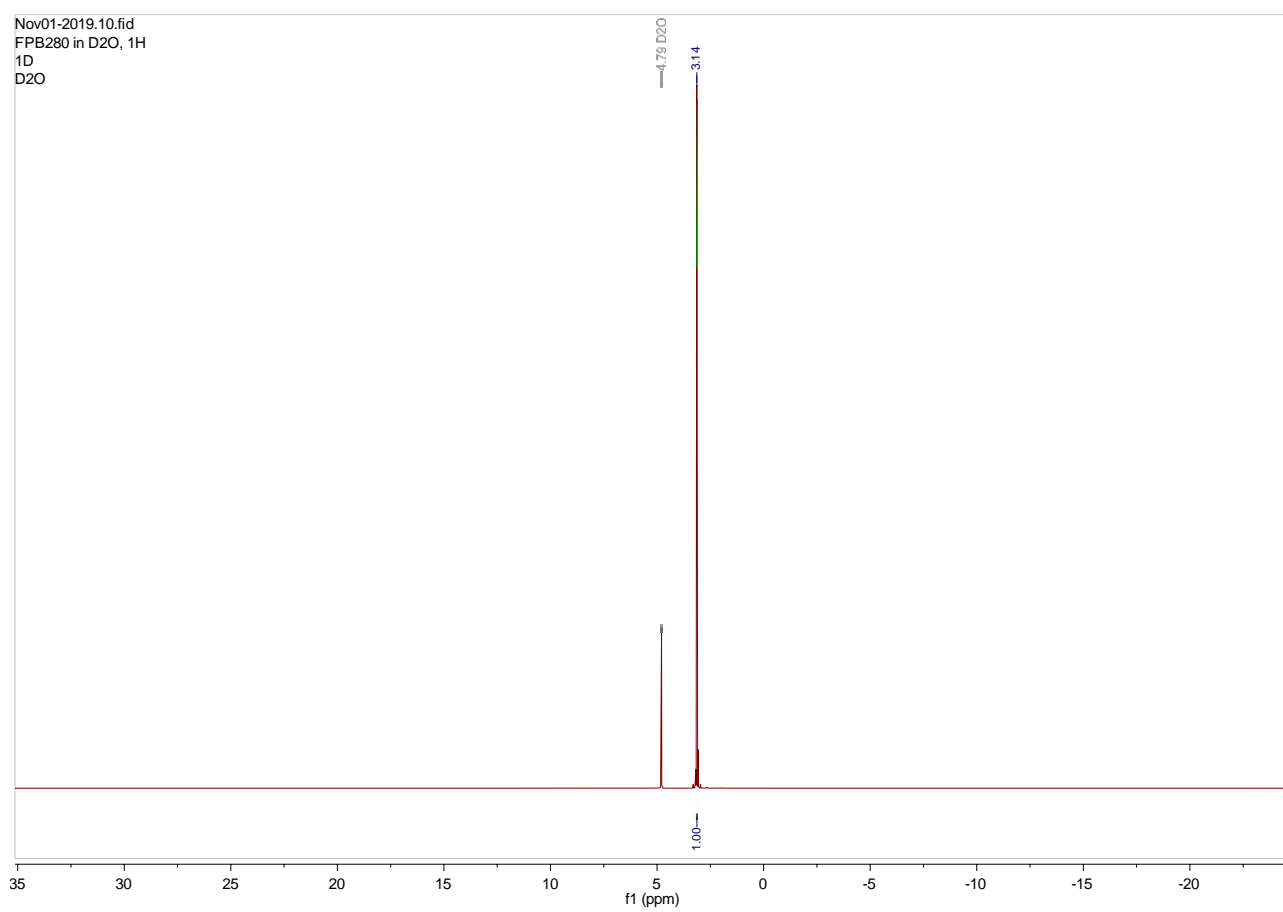

Figure 43: Proton NMR spectrum of  $[Na][N(Ms)(TFA)]$ .

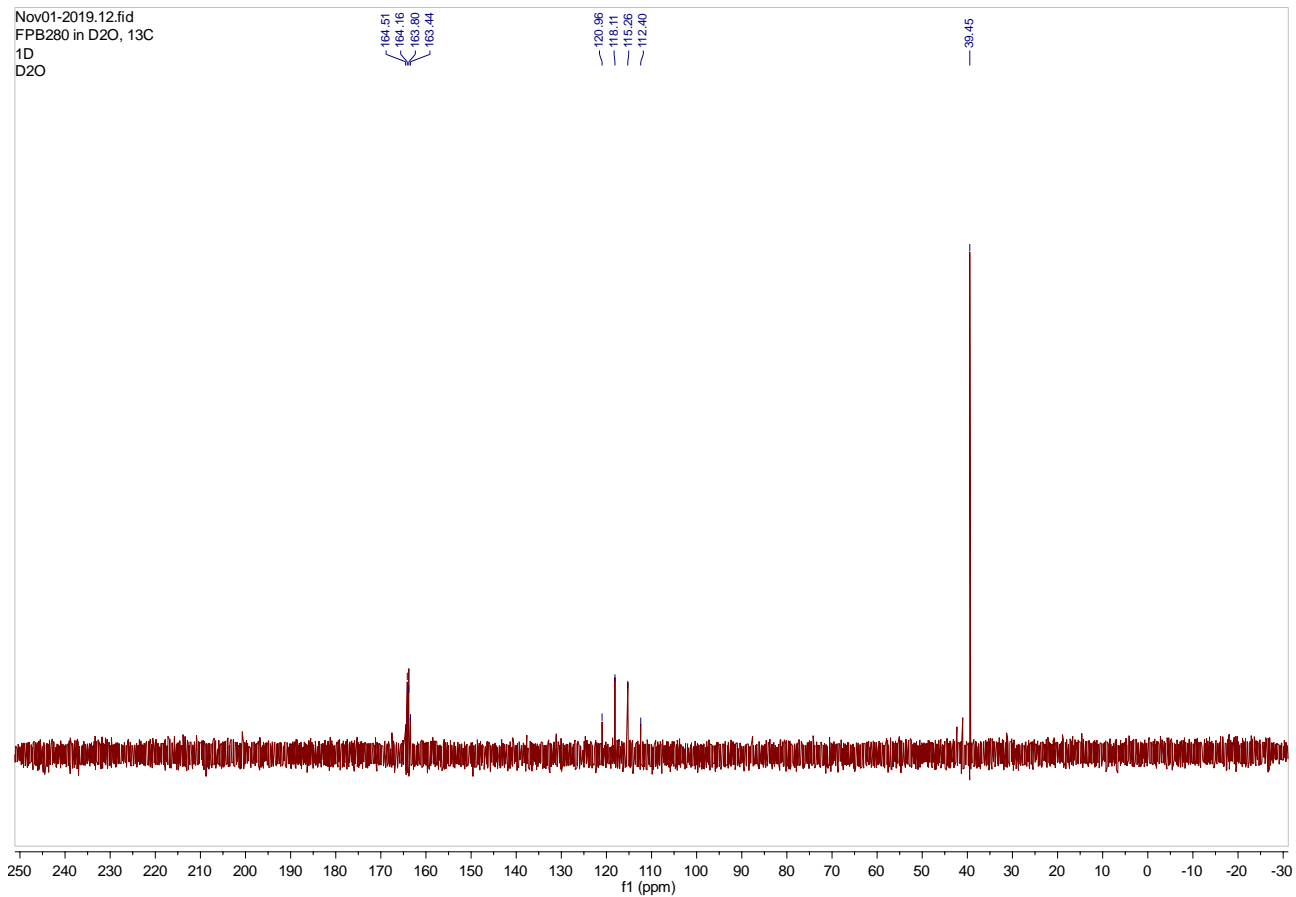

Figure 44: Carbon NMR spectrum of  $[Na][N(Ms)(TFA)]$ .

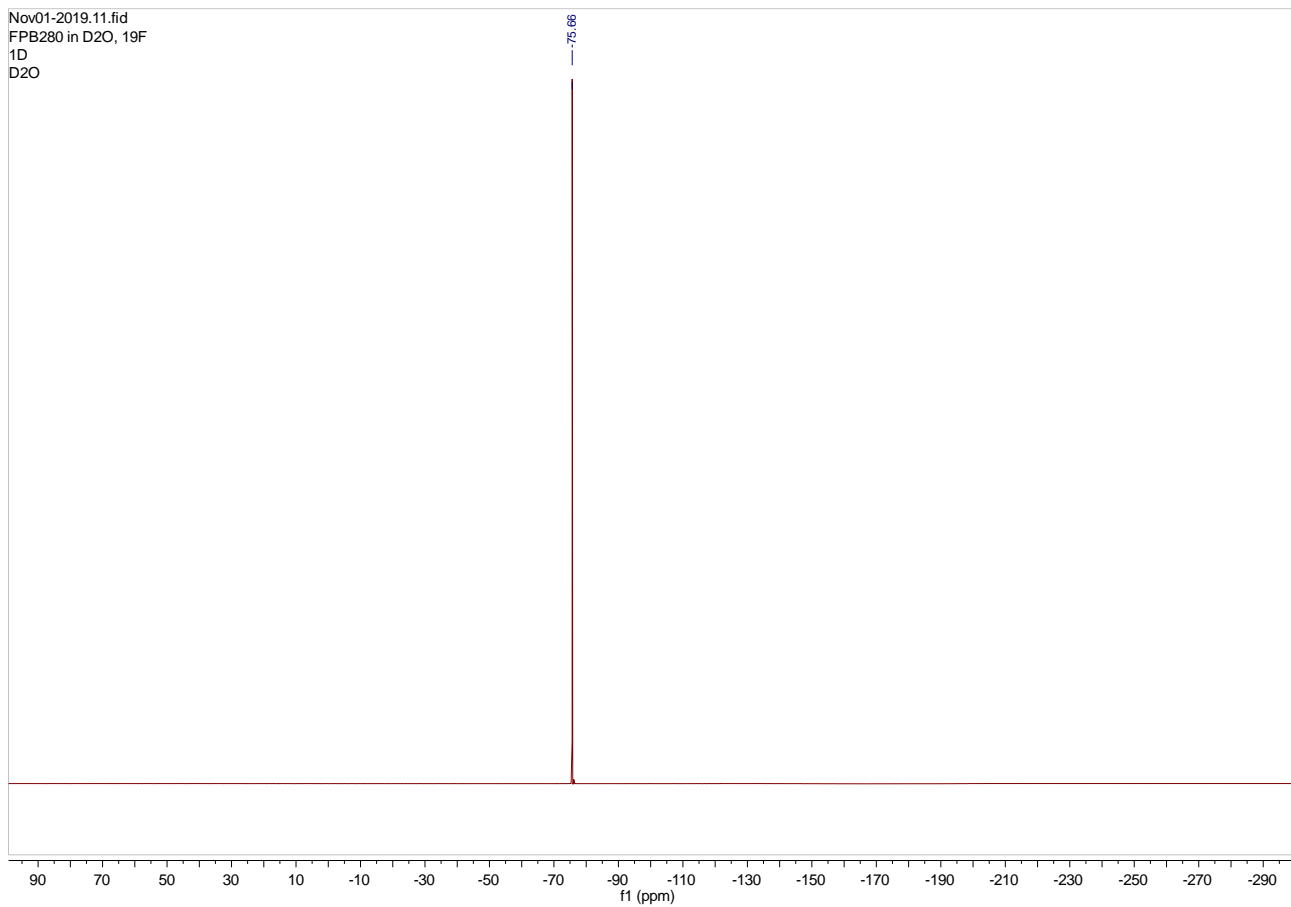

Figure 45: Fluorine NMR spectrum of  $[Na][N(Ms)(TFA)]$ .

## 12. References

- 1) Martin, M. T.; Roschinger, F.; Eaddy, J. F. Practical acid-catalyzed acylation of sulfonamides with carboxylic acid anhydrides. *Tetrahedron Lett.*, **2003**, *44*, 5461-5463.
- 2) CrysAlis Pro: Agilent, **2014**, Agilent Technologies Ltd, Yarnton, Oxfordshire, UK.
- 3) Sheldrick, G. M. A short history of SHELX. *Acta Crystallogr. Sect. A*, **2008**, *64*, 112.
- 4) Dolomanov, O. V.; Bourhis, L. J.; Gildea, R. J.; Howard, J. A. K.; Puschmann, H. OLEX2: a complete structure solution, refinement and analysis program. *J. Appl. Cryst.*, **2009**, *42*, 339.
- 5) Farrugia, L. J. WinGX and ORTEP for Windows: an update. *J. Appl. Cryst.*, **2012**, *45*, 849.
- 6) G. S. Fulcher, ANALYSIS OF RECENT MEASUREMENTS OF THE VISCOSITY OF GLASSES, *J. Am. Ceram. Soc.*, **1925**, *8*, 339-355.
- 7) G. Tammann, W. Hesse, Die Abhängigkeit der Viscosität von der Temperatur bei unterkühlten Flüssigkeiten, *Zeitschrift für Anorg. und Allg. Chemie.*, **1926**, *156*, 245-257.
- 8) H. Tokuda, K. Hayamizu, K. Ishii, M. A. B. H. Susan, M. Watanabe, Physicochemical Properties and Structures of Room Temperature Ionic Liquids. 1. Variation of Anionic Species, *J. Phys. Chem. B.*, **2004**, *108*, 16593-16600.
- 9) O. Zech, A. Stoppa, R. Buchner, W. Kunz, The Conductivity of Imidazolium-Based Ionic Liquids from (248 to 468) K. B. Variation of the Anion †, *J. Chem. Eng. Data.*, **2010**, *55*, 1774-1778.
- 10) H. Tokuda, K. Hayamizu, K. Ishii, M. A. B. H. Susan, M. Watanabe, Physicochemical Properties and Structures of Room Temperature Ionic Liquids. 2. Variation of Alkyl Chain Length in Imidazolium Cation, *J. Phys. Chem. B.*, **2005**, *109*, 6103-6110.
